# Supplementary material for: Nationwide survey of physicians’ familiarity and awareness of diabetes guidelines in China: a cross-sectional study
Source: PubMed Central journal article supplement — BMJ Open. 2023 Dec 21;13(12):e074301. doi: 10.1136/bmjopen-2023-074301 (PMC10749004; doi:10.1136/bmjopen-2023-074301), 2023-12-21
Supplement: bmjopen-2023-074301.draft_revisions.pdf [file bmjopen-2023-074301.draft_revisions.pdf]

# BMJ Open

BMJ Open is committed to open peer review. As part of this commitment we make the peer review history of every article we publish publicly available.

When an article is published we post the peer reviewers' comments and the authors' responses online. We also post the versions of the paper that were used during peer review. These are the versions that the peer review comments apply to.

The versions of the paper that follow are the versions that were submitted during the peer review process. They are not the versions of record or the final published versions. They should not be cited or distributed as the published version of this manuscript.

BMJ Open is an open access journal and the full, final, typeset and author-corrected version of record of the manuscript is available on our site with no access controls, subscription charges or pay-per-view fees (<http://bmjopen.bmj.com>).

If you have any questions on BMJ Open's open peer review process please email [info.bmjopen@bmj.com](mailto:info.bmjopen@bmj.com)

# BMJ Open

## Nationwide Survey of Physicians Awareness and Adherence to Diabetes Guidelines in China

|                               |                                                                                                                                                                                                                                                                                                                                                                                                                                                                                                                                                                                                                                                                                                                                                                                                                                                                                                                                                                        |
|-------------------------------|------------------------------------------------------------------------------------------------------------------------------------------------------------------------------------------------------------------------------------------------------------------------------------------------------------------------------------------------------------------------------------------------------------------------------------------------------------------------------------------------------------------------------------------------------------------------------------------------------------------------------------------------------------------------------------------------------------------------------------------------------------------------------------------------------------------------------------------------------------------------------------------------------------------------------------------------------------------------|
| Journal:                      | <i>BMJ Open</i>                                                                                                                                                                                                                                                                                                                                                                                                                                                                                                                                                                                                                                                                                                                                                                                                                                                                                                                                                        |
| Manuscript ID                 | bmjopen-2023-074301                                                                                                                                                                                                                                                                                                                                                                                                                                                                                                                                                                                                                                                                                                                                                                                                                                                                                                                                                    |
| Article Type:                 | Original research                                                                                                                                                                                                                                                                                                                                                                                                                                                                                                                                                                                                                                                                                                                                                                                                                                                                                                                                                      |
| Date Submitted by the Author: | 04-Apr-2023                                                                                                                                                                                                                                                                                                                                                                                                                                                                                                                                                                                                                                                                                                                                                                                                                                                                                                                                                            |
| Complete List of Authors:     | Jia, Liyan; The First Affiliated Hospital of Xiamen University,<br>Zhao, Neng-jiang; First Affiliated Hospital of Xiamen University<br>Lai, Bao-yong; Beijing University of Chinese Medicine Xiamen Hospital<br>Huang, Caoxin; The First Affiliated Hospital of Xiamen University, Xiamen Diabetes Institute<br>Zhang, Zhi-hai; First Affiliated Hospital of Xiamen University<br>Li, Le; First Affiliated Hospital of Xiamen University<br>Zhan, Na; Fujian University of Traditional Chinese Medicine<br>Yuan-bing, Lin; Fujian University of Traditional Chinese Medicine<br>Cai, Miao-na; First Affiliated Hospital of Xiamen University<br>Wang, Shunqin ; Beijing University of Chinese Medicine Xiamen Hospital<br>Yan, Bing; Xiamen Diabetes Institute,<br>Liu, Jianping; Beijing University of Traditional Chinese Medicine, ;<br>NAFKAM, Department of Community Medicine<br>Yang, Shu-yu; First Affiliated Hospital of Xiamen University; Xiamen University |
| Keywords:                     | General diabetes < DIABETES & ENDOCRINOLOGY, Physicians, Protocols & guidelines < HEALTH SERVICES ADMINISTRATION & MANAGEMENT                                                                                                                                                                                                                                                                                                                                                                                                                                                                                                                                                                                                                                                                                                                                                                                                                                          |
|                               |                                                                                                                                                                                                                                                                                                                                                                                                                                                                                                                                                                                                                                                                                                                                                                                                                                                                                                                                                                        |

SCHOLARONE™  
Manuscripts

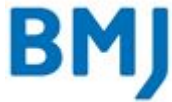

I, the Submitting Author has the right to grant and does grant on behalf of all authors of the Work (as defined in the below author licence), an exclusive licence and/or a non-exclusive licence for contributions from authors who are: i) UK Crown employees; ii) where BMJ has agreed a CC-BY licence shall apply, and/or iii) in accordance with the terms applicable for US Federal Government officers or employees acting as part of their official duties; on a worldwide, perpetual, irrevocable, royalty-free basis to BMJ Publishing Group Ltd ("BMJ") its licensees and where the relevant Journal is co-owned by BMJ to the co-owners of the Journal, to publish the Work in this journal and any other BMJ products and to exploit all rights, as set out in our [licence](#).

The Submitting Author accepts and understands that any supply made under these terms is made by BMJ to the Submitting Author unless you are acting as an employee on behalf of your employer or a postgraduate student of an affiliated institution which is paying any applicable article publishing charge ("APC") for Open Access articles. Where the Submitting Author wishes to make the Work available on an Open Access basis (and intends to pay the relevant APC), the terms of reuse of such Open Access shall be governed by a Creative Commons licence – details of these licences and which [Creative Commons](#) licence will apply to this Work are set out in our licence referred to above.

Other than as permitted in any relevant BMJ Author's Self Archiving Policies, I confirm this Work has not been accepted for publication elsewhere, is not being considered for publication elsewhere and does not duplicate material already published. I confirm all authors consent to publication of this Work and authorise the granting of this licence.

## Nationwide Survey of Physicians Awareness and Adherence to Diabetes Guidelines in China

Li-yan Jia<sup>1</sup>, Neng-jiang Zhao<sup>1</sup>, Bao-yong Lai<sup>2</sup>, Cao-xin Huang<sup>3</sup>, Zhi-hai Zhang<sup>1</sup>, Le Li<sup>1</sup>, Na Zhan<sup>4</sup>, Yuan-bing Lin<sup>4</sup>, Miao-na Cai<sup>1</sup>, Shun-qin Wang<sup>2</sup>, Bing Yan<sup>1</sup>, Jian-ping Liu<sup>5</sup>, Shu-yu Yang<sup>1,6</sup>

1. The First Affiliated Hospital of Xiamen University, Xiamen, China.
2. Beijing University of Chinese Medicine Xiamen Hospital, Xiamen, China.
3. Xiamen Diabetes Institute, Department of Endocrinology and Metabolism, The First Affiliated Hospital of Xiamen University, Xiamen, China.
4. Graduate school, Fujian University of traditional Chinese Medicine, Xiamen, China.
5. Centre for evidence-based Chinese medicine, Beijing University of Chinese Medicine, Beijing, China.
6. Medical School, Xiamen University, Xiamen, China.

### Corresponding author:

Shu-yu Yang, MD, PhD, Professor (ORCID: <https://orcid.org/0000-0003-2950-0861>)

The First Affiliated Hospital of Xiamen University; Medical School of Xiamen University

Xiamen 361003, China

Email: [xmyangshuyu@xmu.edu.com](mailto:xmyangshuyu@xmu.edu.com)

Tel: +86 13950062003

**ABSTRACT**

Objective: To explore physicians' familiarity with four diabetes guidelines and their practice of specific recommendations from diabetes guidelines.

Design: Cross-sectional survey study.

Setting: A questionnaire survey was conducted online among physicians in the Specialist Committee for Primary Diabetes Care of China Association of Chinese Medicine, and snowball sampling method was used to reach more physicians.

Participants: 1150 physicians (461 tertiary care physicians (TCPs), 307 secondary care physicians (SCPs), and 382 primary care practitioners (PCPs)) from 192 cities in 30 provinces in China with complete data.

Results: The TCPs had the highest familiarity with the type 2 diabetes mellitus guideline (91.33%), followed by the national primary care diabetes guideline (76.79%), the American Diabetes Association standards guideline (72.24%) and the traditional Chinese medicine (TCM) diabetes guideline (63.77%). The overall result of physicians' self-reported reference to western diabetes guidelines (73.22%) was twice of that for TCM diabetes guidelines (33.83%). The PCPs' familiarity with the four guidelines is about 50% or less. Less than 40% of physicians chose the option of "hand over to a special nutritionist or professional nutrition team" involving dietary or physical exercise management for diabetics. About 90% of physicians from different groups had instructed diabetics with self-monitoring blood glucose. As for health education management, 75.70% of the TCPs reported they had the diabetes health management team, followed by SCPs (57.00%) and PCPs (27.49%). Moreover, about 40% of physicians didn't grasp the guideline recommendations about hypoglycemia well enough.

Conclusions: The level of familiarity and adherence to the screening guidelines varied among physicians in different level hospitals. Of note, there have significant discrepancies between physicians' awareness and adherence to western medicine guidelines and TCM guidelines. In addition, there is a gap between clinical practice and guidelines in terms of physicians' awareness and practice of diabetes guidelines.

**KEY WORDS:** Diabetes Mellitus; Guidelines; Physician Awareness

## 1. INTRODUCTION

Diabetes is a metabolic disorder caused by genetic and environmental factors, which had become a critical health concern worldwide owing to its high prevalence and related disability and mortality<sup>[1,2]</sup>. From 1980 to 2014, the increasing prevalence had nearly quadrupled the number of adult diabetes patients worldwide<sup>[3]</sup>. A nationally-representative epidemiological survey has demonstrated that the overall prevalence of diabetes in mainland China was 12.8%<sup>[4]</sup>. However, according to the monitoring report on chronic diseases and their risk factors in China, the national diabetes awareness rate, treatment rate, and control rate were 38.0%, 34.1% and 33.1%, respectively<sup>[5]</sup>. Moreover, another large sample survey found that only 12.42% patients achieved glycemic control<sup>[6]</sup>. Therefore, it is necessary to address this important public health issue so that the improved national diabetes awareness rate, treatment rate and control rate are expected.

Clinical practice guidelines are statements that assist health professionals and patients in achieving optimal management of diseases. At the same time, the physicians' standardized mastery and active application of the practice guidelines are important for ensuring the health professionals to achieve optimal management of patients<sup>[7]</sup>. Previous studies have pointed out that successful adoption of clinical practice guidelines was related to physician awareness<sup>[8-10]</sup>. Additionally, a systematic review identified physicians' lack of awareness of a guideline's existence and lack of familiarity with the guideline as the leading causes of deviation from recommended therapy<sup>[11]</sup>. Significantly, a cross-sectional study found that physicians' lack of knowledge and patients' lack of awareness to type 2 diabetes guidelines could account for about 70% of non-adherence<sup>[12]</sup>. Therefore, it is critical and necessary to emphasize physician awareness and adherence to clinical guidelines.

For the prevention and standardized management of diabetes mellitus, a series of clinical guidance documents have been released successively, such as the type 2 diabetes mellitus (T2DM) guideline issued by Chinese Diabetes Society (CDS)<sup>[13]</sup>, the national primary care diabetes guideline issued by CDS<sup>[14]</sup>, the traditional Chinese medicine (TCM) diabetes guideline issued by China Association of Chinese Medicine (CACM)<sup>[15]</sup>, and the standards of medical care in diabetes issued by the American Diabetes Association

(ADA)<sup>[16]</sup>. However, it remains unclear whether physicians follow these guidelines, and particularly whether different physicians have different awareness and adherence to the guidelines. To provide nationally representative evidence of physicians' awareness and adherence to diabetes guidelines in China, we conducted a national survey to compare physicians' awareness, adherence and practice of different diabetes guidelines, as well as the comparison among different physician groups from tertiary to primary. Furthermore, to ensure the implementation of diabetes guidelines into current practice, the facilitators and barriers to diabetes guidelines implementation by different physician groups were identified as well.

## 2. RESEARCH DESIGN AND METHODS

### 2.1 Survey design

This is an investigator-initiated, non-commercial survey of physicians in different level hospitals in China. This work was carried out by the Specialist Committee for Primary Diabetes Care of China Association of Chinese Medicine, which is a national academic institution, majority of physicians as members of the Specialist Committee have participated in the survey questionnaire. The questionnaire was distributed electronically to the participants, electronically written informed consent was showed to respondents before proceeding with the survey. These participants were also asked to help forward the questionnaire to additional general practitioners, physicians, and experts using the snowball sampling method. In the overall design of this survey, we try to ensure that the respondents are physicians from different grades of hospitals in China, including physicians from tertiary to primary medical institutions. Besides, considering the purpose of this study, the endocrinology diabetes specialists, general practitioners, and TCM physicians were mainly enrolled.

### 2.2 Questionnaire and pretest

A questionnaire with 42 items was established, which was consisted of four sections. Section I assessed participants' clinical background and basic demographic data. Section II assessed participants' familiarity and self-reported reference to different diabetes guidelines. These questions were set as single-choice questions in the form of Likert scales. Section III assessed participants' practice and application of specific measures in

1 diabetes guidelines, the list of guideline-based recommendations was shown in Appendix 1. We reworded the  
2  
3 guideline action statements into options so that respondents could choose the most appropriate answers to these  
4  
5 questions. These questions were set as single-choice questions or multiple-choice questions respectively.  
6  
7

8 Section IV investigated the facilitating factors and barriers in the process of guideline implementation.  
9

10 The questionnaire was pilot tested in 24 physicians from Fujian and Gansu provinces in China from Aug  
11  
12 20, 2021 to Aug 27, 2021 to determine whether the questions were clear, understandable and logical.  
13  
14

15 Additionally, experts who are familiar with the diabetes guidelines were invited to criticize the contents of the  
16  
17 questionnaire. Finally, we optimized the questionnaire items based on the results of the pilot survey and expert  
18  
19 consultation meeting.  
20  
21  
22

### 23 **2.3 Sample and administration**

24 The sample size was calculated according to the cross-sectional survey sample size estimation formula  $N =$   
25  
26  $(Z_{\alpha}^2 * pq) / (d^2)^{[17]}$ . In this study, we calculated the sample size by taking  $\alpha = 0.05$ ,  $Z_{\alpha} = 1.96$ ,  $q = 1 - p$ , and  $d$  as the  
27  
28 allowable error (usually set at  $d = 0.1 * p$ ). In this estimation formula,  $p$  represents the proportion of Chinese  
29  
30 physicians very familiar with diabetes guidelines according to literature search, which is about 26.2%. By  
31  
32 plugging in the values, the final sample size was determined to be 1082 cases. The formal investigation was  
33  
34 performed from Sep 22, 2021 to Oct 29, 2021, a total of 1 162 participants completed the survey. After the  
35  
36 logical verification of these collected samples, if there are any discrepancies in the questionnaires, it was  
37  
38 confirmed through telephone.  
39  
40  
41  
42  
43  
44  
45  
46

### 47 **2.4 Statistical analysis**

48 Statistics analysis was performed using SAS Version 9.4. Analysis was primarily descriptive, but  
49  
50 appropriate inferential statistics were performed where comparisons between groups were indicated. Pearson  
51  
52 Chi-square test was used to compare categorical variables as appropriate. Wilcoxon rank-sum tests were used  
53  
54 when the numerical variables didn't meet the normal distribution. In addition, Cochran-Mantel-Haenszel  
55  
56 (CMH) tests were used when the variables were ordinal categorical variables. The differences among different  
57  
58  
59  
60



1 physician groups regarding guidelines awareness and adherence were analyzed, including tertiary care  
2  
3 physicians (TCPs), secondary care physicians (SCPs), and primary care practitioners (PCPs). Then a  
4  
5 comparison among endocrinologists, general practitioners, and other physicians was also performed. In this  
6  
7 study, the differences across each group were reported as percentage differences. A *P*-value less than 0.05 is  
8  
9 statistically significant.  
10

### 13 3. RESULTS

#### 16 3.1 Sample characteristics

17  
18 1 162 questionnaires were finally collected, we included 1 150 (98.97%) questionnaires from physicians  
19  
20 after excluding 12 questionnaires (7 from nurses, 2 from pharmacists and 3 from medical teachers). 461  
21  
22 questionnaires (40.09%) were from TCPs, 307 questionnaires (26.70%) from SCPs, and 382 questionnaires  
23  
24 (33.22%) from PCPs. There were no significant differences among the three groups of physicians in age, but  
25  
26 there are differences in gender, education level, professional category, years in practice, technical title, diabetes  
27  
28 practice setting, and treatment number of diabetics per week. Full characteristics of the physicians are shown in  
29  
30 supplemental appendix 1.  
31  
32  
33  
34  
35

#### 36 3.2 Physicians' familiarity with diabetes guidelines

37  
38  
39 Physicians' familiarity with diabetes guidelines is illustrated in Figure 1. The results suggested that the  
40  
41 TCPs had the highest familiarity (including very familiar and relatively familiar) with the CDS T2DM  
42  
43 guideline (91.33%), followed by the CDS national primary care guideline (76.79%), the ADA diabetes  
44  
45 guideline (72.24%) and the CACM TCM diabetes guideline (63.77%). The result from the SCPs' familiarity  
46  
47 with four guidelines generated similar results. The PCPs' familiarity with four guidelines followed by the CDS  
48  
49 national primary care guideline (51.05%), the CDS T2DM guideline (51.04%), the CACM TCM diabetes  
50  
51 guideline (35.34%), and the ADA diabetes guideline (22.25%).  
52  
53  
54  
55  
56

57  
58 Additional analysis was performed by using different professional physicians, which demonstrated that the  
59  
60 endocrinologists had the highest familiarity with the CDS T2DM guideline (95.48%), followed by the CDS

1 national primary care guideline (80.15%), the ADA diabetes guideline (74.86%) and the CACM TCM diabetes  
2 guideline (62.47%). In addition, the general practitioners had the best familiarity with the CDS national primary  
3 care guideline (55.23%), followed by the CDS T2DM guideline (53.97%), the CACM TCM diabetes guideline  
4 (32.64%) and the ADA diabetes guideline (26.78%). The result from the other physicians' familiarity of all  
5 guidelines generated similar results.  
6  
7  
8  
9  
10  
11

12  
13  
14  
15  
16 Insert "Figure1. Physicians' familiarity with four diabetes guidelines (the CDS T2DM guideline, the CDS  
17 national primary care diabetes guideline, the CACM TCM diabetes guideline, the ADA diabetes guideline). (A)  
18 Analysis based on the groups of physicians in different level hospitals. (B) Analysis based on the groups of  
19 physicians with different majors. *Note.* ADA, the American Diabetes Association; CDS, the Chinese Diabetes  
20 Society; TCM, traditional Chinese medicine; CACM, the China Association of Chinese Medicine."  
21  
22  
23  
24  
25  
26  
27  
28  
29  
30

### 31 **3.3 Physicians' self-reported reference to diabetes guidelines**

32  
33  
34 Physicians' self-reported reference to diabetes guidelines illustrated in Table1. As for modern medicine  
35 guidelines, the results suggested that the "frequent reference" rates of TCPs, SCPs and PCPs were 80.91%,  
36 77.20% and 60.73% respectively. While, the "frequent reference" rates of TCPs, SCPs and PCPs for TCM  
37 guidelines were 36.23%, 36.48% and 28.80% respectively. Similarly, the "frequent reference" rates of  
38 endocrinologists, general practitioners and other physicians for modern medicine guidelines were 86.84%,  
39 62.76% and 62.19%. The "frequent reference" rates of endocrinologists, general practitioners and other  
40 physicians for TCM guidelines were 36.74%, 25.52% and 35.07%.  
41  
42  
43  
44  
45  
46  
47  
48  
49  
50  
51  
52  
53  
54  
55  
56  
57  
58  
59  
60

Table 1. Physicians self-reported reference to Diabetes Guidelines [n(%)]

|                                               |                        | Physicians in different level hospitals |                         |                         |                            | Physicians in different departments |                  |                            |                         |                 |
|-----------------------------------------------|------------------------|-----------------------------------------|-------------------------|-------------------------|----------------------------|-------------------------------------|------------------|----------------------------|-------------------------|-----------------|
| Categories                                    |                        | Overall                                 | Tertiary care           | Secondary care          | Primary care               | <i>P</i> -value                     | Endocrinologists | General                    | Other                   | <i>P</i> -value |
|                                               |                        | (n = 1150)                              | physicians<br>(n = 461) | physicians<br>(n = 307) | practitioners<br>(n = 382) |                                     | (n = 509)        | practitioners<br>(n = 239) | physicians<br>(n = 402) |                 |
| Modern<br>medicine<br>guidelines <sup>a</sup> | Frequent reference     | 842 (73.22)                             | 373 (80.91)             | 237 (77.20)             | 232 (60.73)                |                                     | 442 (86.84)      | 150 (62.76)                | 250 (62.19)             |                 |
|                                               | Sometimes reference    | 236 (20.52)                             | 75 (16.27)              | 59 (19.22)              | 102 (26.70)                |                                     | 56 (11.00)       | 60 (25.10)                 | 120 (29.85)             |                 |
|                                               | Occasionally reference | 53 (4.61)                               | 9 (1.95)                | 8 (2.61)                | 36 (9.42)                  | < 0.001                             | 9 (1.77)         | 24 (10.04)                 | 20 (4.98)               | < 0.001         |
|                                               | Basically no reference | 17 (1.48)                               | 4 (0.87)                | 3 (0.98)                | 10 (2.62)                  |                                     | 2 (0.39)         | 4 (1.67)                   | 11 (2.74)               |                 |
|                                               | No reference           | 2 (0.17)                                | 0 (0.00)                | 0 (0.00)                | 2 (0.52)                   |                                     | 0 (0.00)         | 1 (0.42)                   | 1 (0.25)                |                 |
| TCM<br>guidelines <sup>b</sup>                | Frequent reference     | 389 (33.83)                             | 167 (36.23)             | 112 (36.48)             | 110 (28.80)                |                                     | 187 (36.74)      | 61 (25.52)                 | 141 (35.07)             |                 |
|                                               | Sometimes reference    | 459 (39.91)                             | 182 (39.48)             | 127 (41.37)             | 150 (39.27)                |                                     | 204 (40.08)      | 93 (38.91)                 | 162 (40.30)             |                 |
|                                               | Occasionally reference | 186 (16.17)                             | 66 (14.32)              | 41 (13.36)              | 79 (20.68)                 | 0.071                               | 69 (13.56)       | 52 (21.76)                 | 65 (16.17)              | 0.716           |
|                                               | Basically no reference | 89 (7.74)                               | 34 (7.38)               | 25 (8.14)               | 30 (7.85)                  |                                     | 39 (7.66)        | 25 (10.46)                 | 25 (6.22)               |                 |
|                                               | No reference           | 27 (2.35)                               | 12 (2.60)               | 2 (0.65)                | 13 (3.40)                  |                                     | 10 (1.96)        | 8 (3.35)                   | 9 (2.24)                |                 |

a. Modern medicine guidelines including the standards of medical care in diabetes issued by American Diabetes Association, the T2DM guideline issued by Chinese Diabetes Society, and the national primary care guideline issued by Chinese Diabetes Society.

b. TCM guidelines including the TCM diabetes guideline issued by China Association of Chinese Medicine.

### 3.4 Physicians' awareness and practice of content from diabetes guidelines

The goal of this section is to evaluate physicians' awareness and practice of the relevant contents in the diabetes guidelines, including dietary management, physical exercise management, self-monitoring of blood glucose (SMBG) instruction, health education, hypoglycemia, and treatment according to TCM differentiation.

Detailed information for specific recommendation in the guidelines is shown in supplemental appendix 2.

#### (1) Dietary and physical exercise management

In terms of dietary management for patients with diabetes, the proportion of TCPs, SCPs and PCPs choosing the option of "Hand over to a special nutritionist or professional nutrition team" were 39.48%, 25.73% and 22.77% respectively. Similarly, the proportion of endocrinologists, general practitioners and other physicians for this option were 34.77%, 22.59% and 29.10% respectively. The proportion of TCPs, SCPs and PCPs choosing the option of "Personally evaluate the nutritional status of patients and give detailed nutritional suggestions" were 61.39%, 61.56% and 43.98% respectively. In addition, 54.43% of respondents chose the option of "Recommend specific dietary patterns for patients, such as Mediterranean diet, low-fat and low-energy diet, etc". It should be noted that the PCPs (54.03%) had the highest rate of choosing the option of "Due to the limited time, only given the oral instruction of paying attention to diet" compared with TCPs (27.98%) and SCPs (24.43%).

As for physical exercise management, the proportion of TCPs, SCPs and PCPs choosing the option of "Hand over to a special health manager or professional manager team" were 29.28%, 21.17% and 20.16% respectively. This option reported by different professional physicians also indicated a similar trend. The proportion of TCPs, SCPs and PCPs choosing the option of "Personally evaluate the athletic ability of patients and give detailed physical exercise suggestions" were 66.59%, 69.71% and 52.88% respectively. Similarly, this option reported by endocrinologists, general practitioners and other physicians were 71.12%, 53.14% and 58.21% respectively. Additionally, another result we noted by physicians from different groups was that there were more than one-third (39.39%) of physicians chose the option of "Increase exercise and improve physical fitness for the patients with frequent hypoglycemia". Detailed results are illustrated in Table 2.

Table 2. Physicians practice of dietary recommendations and exercise recommendations according to diabetes guidelines [n(%)]

| Categories                                                                                                     | Physicians in different level hospitals                            |                                          |                                           |                                            |                 | Physicians in different departments |                                       |                                  |                 |
|----------------------------------------------------------------------------------------------------------------|--------------------------------------------------------------------|------------------------------------------|-------------------------------------------|--------------------------------------------|-----------------|-------------------------------------|---------------------------------------|----------------------------------|-----------------|
|                                                                                                                | Overall<br>(n = 1150)                                              | Tertiary care<br>physicians<br>(n = 461) | Secondary care<br>physicians<br>(n = 307) | Primary care<br>practitioners<br>(n = 382) | <i>P</i> -value | Endocrinologists<br>(n = 509)       | General<br>practitioners<br>(n = 239) | Other<br>physicians<br>(n = 402) | <i>P</i> -value |
|                                                                                                                | Hand over to a special nutritionist or professional nutrition team | 348 (30.26)                              | 182 (39.48)                               | 79 (25.73)                                 | 87 (22.77)      | < 0.001                             | 177 (34.77)                           | 54 (22.59)                       | 117 (29.10)     |
| Personally evaluate the nutritional status of patients and give detailed nutritional suggestions               | 640 (55.65)                                                        | 283 (61.39)                              | 189 (61.56)                               | 168 (43.98)                                | < 0.001         | 339 (66.60)                         | 105 (43.93)                           | 196 (48.76)                      | < 0.001         |
| Recommend specific dietary patterns for patients, such as Mediterranean diet, low-fat and low-energy diet, etc | 626 (54.43)                                                        | 263 (57.05)                              | 163 (53.09)                               | 200 (52.36)                                | 0.340           | 278 (54.62)                         | 130 (54.39)                           | 218 (54.23)                      | 0.993           |
| Distribute brochures                                                                                           | 701 (60.96)                                                        | 265 (57.48)                              | 199 (64.82)                               | 237 (62.04)                                | 0.108           | 314 (61.69)                         | 165 (69.04)                           | 222 (55.22)                      | 0.002           |
| Dietary guidance based on TCM                                                                                  | 546 (47.48)                                                        | 208 (45.12)                              | 147 (47.88)                               | 191 (50.00)                                | 0.364           | 231 (45.38)                         | 99 (41.42)                            | 216 (53.73)                      | 0.005           |
| Due to the limited time, only given the orders of paying attention to diet simply                              | 334 (29.04)                                                        | 129 (27.98)                              | 75 (24.43)                                | 130 (54.03)                                | 0.018           | 135 (26.52)                         | 81 (33.89)                            | 118 (29.35)                      | 0.116           |
| Hand over to a special health manager or professional manager team                                             | 277 (24.09)                                                        | 135 (29.28)                              | 65 (21.17)                                | 77 (20.16)                                 | 0.003           | 137 (26.92)                         | 49 (20.50)                            | 91 (22.64)                       | 0.113           |

|    |                                  |             |             |             |             |         |             |             |             |         |
|----|----------------------------------|-------------|-------------|-------------|-------------|---------|-------------|-------------|-------------|---------|
| 1  | Personally evaluate the          |             |             |             |             |         |             |             |             |         |
| 2  | athletic ability of patients and |             |             |             |             |         |             |             |             |         |
| 3  | give detailed physical exercise  | 723 (62.87) | 307 (66.59) | 214 (69.71) | 202 (52.88) | < 0.001 | 362 (71.12) | 127 (53.14) | 234 (58.21) | < 0.001 |
| 4  | suggestions                      |             |             |             |             |         |             |             |             |         |
| 5  | Increase exercise and improve    |             |             |             |             |         |             |             |             |         |
| 6  | physical fitness for patients    | 453 (39.39) | 161 (34.92) | 120 (39.09) | 172 (45.03) | 0.011   | 171 (33.60) | 105 (43.93) | 177 (44.03) | 0.002   |
| 7  | with frequent hypoglycemia       |             |             |             |             |         |             |             |             |         |
| 8  | Distribute brochures             | 716 (62.26) | 258 (55.97) | 208 (67.75) | 250 (65.45) | 0.001   | 314 (61.69) | 169 (70.71) | 233 (57.96) | 0.005   |
| 9  | Physical exercises of TCM,       |             |             |             |             |         |             |             |             |         |
| 10 | such as Tai Chi and Baduanjin    | 539 (46.87) | 207 (44.90) | 152 (49.51) | 180 (47.12) | 0.452   | 222 (43.61) | 109 (45.61) | 208 (51.74) | 0.046   |
| 11 | Due to the limited time, only    |             |             |             |             |         |             |             |             |         |
| 12 | regular exercise orders were     | 389 (33.83) | 158 (34.27) | 97 (31.60)  | 134 (35.08) | 0.609   | 167 (32.81) | 82 (34.31)  | 140 (34.83) | 0.803   |
| 13 | given                            |             |             |             |             |         |             |             |             |         |

## (2) Instruction of SMBG and health education management

The results showed that the TCPs had the highest SMBG instruction rate based on "all guidance and regular guidance" (96.53%), followed by SCPs (94.47%) and PCPs (87.96%). Meanwhile, in this exploratory analysis, we found that endocrinologists had the highest SMBG instruction rate on both "all guidance" and "regular guidance" (97.05%), followed by other physicians (90.80%) and general practitioners (88.70%). Finally, as for health education management, 75.70% of the TCPs reported they have equipped the diabetes health management team, followed by SCPs (57.00%) and PCPs (27.49%). A similar trend was reported by the groups of physicians with different majors (endocrinologists (77.21%), general practitioners (31.80%), and other physicians (39.80%)). Detailed results are illustrated in Table 3.

Table 3. Physicians' practice of self-monitoring blood glucose and the availability of diabetes health management teams in their affiliated units [n(%)]

| Categories                                      | Overall<br>(n = 1150) | Physicians in different level hospitals  |                                           |                                            | <i>P</i> -value | Physicians in different departments |                                       |                                  | <i>P</i> -value |
|-------------------------------------------------|-----------------------|------------------------------------------|-------------------------------------------|--------------------------------------------|-----------------|-------------------------------------|---------------------------------------|----------------------------------|-----------------|
|                                                 |                       | Tertiary care<br>physicians<br>(n = 461) | Secondary care<br>physicians<br>(n = 307) | Primary care<br>practitioners<br>(n = 382) |                 | Endocrinologists<br>(n = 509)       | General<br>practitioners<br>(n = 239) | Other<br>physicians<br>(n = 402) |                 |
| Instruction of self-monitoring<br>blood glucose |                       |                                          |                                           |                                            |                 |                                     |                                       |                                  |                 |
| All guidance                                    | 475 (41.30)           | 237 (51.41)                              | 139 (45.28)                               | 99 (25.92)                                 |                 | 269 (52.85)                         | 60 (25.10)                            | 146 (36.32)                      |                 |
| Frequent guidance                               | 596 (51.83)           | 208 (45.12)                              | 151 (49.19)                               | 237 (62.04)                                |                 | 225 (44.20)                         | 152 (63.60)                           | 219 (54.48)                      |                 |
| Occasional guidance                             | 59 (5.13)             | 12 (2.60)                                | 13 (4.23)                                 | 34 (8.90)                                  | < 0.001         | 13 (2.55)                           | 21 (8.79)                             | 25 (6.22)                        | < 0.001         |
| Rare guidance                                   | 12 (1.04)             | 2 (0.43)                                 | 2 (0.65)                                  | 8 (2.09)                                   |                 | 0 (0)                               | 5 (2.09)                              | 7 (1.74)                         |                 |
| Never guidance                                  | 8 (0.70)              | 2 (0.43)                                 | 2 (0.65)                                  | 4 (1.05)                                   |                 | 2 (0.39)                            | 1 (0.42)                              | 5 (1.24)                         |                 |
| Have diabetes health management<br>team         |                       |                                          |                                           |                                            |                 |                                     |                                       |                                  |                 |
| Yes                                             | 629 (54.70)           | 349 (75.70)                              | 175 (57.00)                               | 105 (27.49)                                | < 0.001         | 393 (77.21)                         | 76 (31.80)                            | 160 (39.80)                      | < 0.001         |
| No                                              | 521 (45.30)           | 112 (24.30)                              | 132 (43.00)                               | 277 (72.51)                                |                 | 116 (22.79)                         | 163 (68.20)                           | 242 (60.20)                      |                 |

### (3) Knowledge identification of hypoglycemia and TCM differentiation treatment

According to the definition of the hypoglycemia characteristics in the guidelines (supplemental appendix2), the accurate characteristics of hypoglycemia included all options (a, b, c and d) of contents in Table 4. However, TCPs, SCPs, and PCPs choosing the option of “a, b, c and d” in our exploratory analysis were 63.56%, 65.15% and 49.48% respectively. This result suggested that about 40% of physicians may not know the guideline recommendations about hypoglycemia

well enough. A similar result trend was reported by endocrinologists (68.57%), general practitioners (46.03%) and other physicians (55.47%).

According to the recommended prescription for diabetes based on TCM syndrome differentiation in the guidelines (supplemental appendix2), prescriptions for diabetes with Qi-Yin deficiency syndrome included options a, b and c in Table 4. TCPs, SCPs and PCPs choosing the option of “a, b or c” without “d or e”, in other words, the accuracy rate were 86.12%, 86.32% and 83.51% respectively. As for diabetic neuropathy with Qi-deficiency and collateral-obstruction syndrome, prescriptions or interventions for this syndrome differentiation included the options a, b and c in Table 5 based on the guidelines. The accuracy rate of TCPs, SCPs and PCPs were 68.55%, 65.80% and 54.97% respectively. The similar results were reported by endocrinologists (70.33%), general practitioners (58.16%) and other physicians (57.46%).

Table4. Knowledge identification and the accuracy rate based on contents of diabetes guidelines [n(%)]

| Categories                                                                                                                                                   | Overall<br>(n = 1150) | Physicians in different level hospitals  |                                           |                                            | <i>P</i> -value | Physicians in different departments |                                       |                                  | <i>P</i> -value |
|--------------------------------------------------------------------------------------------------------------------------------------------------------------|-----------------------|------------------------------------------|-------------------------------------------|--------------------------------------------|-----------------|-------------------------------------|---------------------------------------|----------------------------------|-----------------|
|                                                                                                                                                              |                       | Tertiary care<br>physicians<br>(n = 461) | Secondary care<br>physicians<br>(n = 307) | Primary care<br>practitioners<br>(n = 382) |                 | Endocrinologists<br>(n = 509)       | General<br>practitioners<br>(n = 239) | Other<br>physicians<br>(n = 402) |                 |
| The characteristics of hypoglycemia including:                                                                                                               |                       |                                          |                                           |                                            |                 |                                     |                                       |                                  |                 |
| a. Blood glucose < 3.9 mmol/l                                                                                                                                | 1045 (90.87)          | 409 (88.72)                              | 282 (91.86)                               | 354 (92.67)                                | 0.110           | 465 (91.36)                         | 221 (92.47)                           | 359 (89.30)                      | 0.355           |
| b. Hypoglycemia with no specific blood glucose limit, accompanied by serious events of consciousness and/or physical changes, and requiring help from others | 788 (68.52)           | 336 (72.89)                              | 223 (72.64)                               | 229 (59.95)                                | < 0.001         | 383 (75.25)                         | 134 (56.07)                           | 271 (67.41)                      | < 0.001         |
| c. sympathetic excitement (such as palpitations, anxiety, sweating, dizziness,                                                                               | 1124 (97.74)          | 453 (98.26)                              | 304 (99.02)                               | 367 (96.07)                                | 0.022           | 507 (99.61)                         | 229 (95.82)                           | 388 (96.52)                      | 0.001           |



handshaking, hunger sensation, etc.)

d. central nervous symptoms (such as

mental changes, cognitive impairment,

convulsions, and coma)

Accuracy rate (All above option)

Prescriptions for diabetes with Qi-Yin

deficiency syndrome

a. Shenqi Jiangtang granule

b. Jinlida granule

c. Shengmai Powder

d. Gegen Qinlian decoction

e. Dachaihu decoction

Accuracy rate (choosing “a, b or c” without

“d or e”)

Prescriptions or interventions for diabetic

neuropathy with Qi-deficiency and

collateral-obstruction syndrome

a. Mudan granule

b. Acupuncture

c. TCM fumigation

d. Qiming granule

Accuracy rate (choosing “a, b or c” without

“d”)

|              |             |             |             |         |             |             |             |         |
|--------------|-------------|-------------|-------------|---------|-------------|-------------|-------------|---------|
| 1013 (88.09) | 424 (91.97) | 289 (94.14) | 300 (78.53) | < 0.001 | 486 (95.48) | 198 (82.85) | 329 (81.84) | < 0.001 |
| 682 (59.30)  | 293 (63.56) | 200 (65.15) | 189 (49.48) | 0.000   | 349 (68.57) | 110 (46.03) | 223 (55.47) | < 0.001 |
| 931 (80.96)  | 370 (80.26) | 256 (83.39) | 305 (79.84) | 0.443   | 419 (82.32) | 194 (81.17) | 318 (79.10) | 0.469   |
| 507 (44.09)  | 221 (47.94) | 157 (51.14) | 129 (33.77) | < 0.001 | 263 (51.67) | 81 (33.89)  | 163 (40.55) | < 0.001 |
| 616 (53.57)  | 270 (58.57) | 150 (48.86) | 196 (51.31) | 0.017   | 268 (52.65) | 107 (44.77) | 241 (59.95) | 0.001   |
| 143 (12.43)  | 51 (11.06)  | 37 (12.05)  | 55 (14.40)  | 0.335   | 47 (9.23)   | 27 (11.30)  | 69 (17.16)  | 0.001   |
| 63 (5.48)    | 27 (5.86)   | 16 (5.21)   | 20 (5.24)   | 0.899   | 23 (4.52)   | 11 (4.60)   | 29 (7.21)   | 0.165   |
| 981 (85.30)  | 397 (86.12) | 265 (86.32) | 319 (83.51) | 0.477   | 452 (88.80) | 206 (86.19) | 323 (80.35) | 0.002   |
| 608 (52.87)  | 281 (60.95) | 170 (55.37) | 157 (41.10) | < 0.001 | 324 (63.65) | 95 (39.75)  | 189 (47.01) | < 0.001 |
| 510 (44.35)  | 216 (46.85) | 134 (43.65) | 160 (41.88) | 0.337   | 222 (43.61) | 84 (35.15)  | 204 (50.75) | 0.001   |
| 650 (56.52)  | 282 (61.17) | 179 (58.31) | 189 (49.48) | 0.002   | 319 (62.67) | 110 (46.03) | 221 (54.98) | < 0.001 |
| 422 (36.70)  | 145 (31.45) | 105 (34.20) | 172 (45.03) | < 0.001 | 151 (29.67) | 100 (41.84) | 171 (42.54) | < 0.001 |
| 728 (63.30)  | 316 (68.55) | 202 (65.80) | 210 (54.97) | < 0.001 | 358 (70.33) | 139 (58.16) | 231 (57.46) | < 0.001 |

### 3.5 Facilitating factors and barriers to diabetes guidelines implementation

Standardizing clinical behavior, guiding patients' self-care, and a high level of evidence were the three most frequently selected facilitating factors behind adherence to diabetes guidelines by all groups of physicians (supplemental appendix 3). The majority of physicians in different level hospitals hold the opinion that "Guidelines can standardize clinical behavior and improve medical quality" (TCPs (96.10%), SCPs (97.07%) and PCPs (93.98%). Similarly, this facilitating factor reported by endocrinologists, general practitioners and other physicians were 97.45%, 95.82% and 93.28% respectively. About 80% physicians in all groups chose the option of "Diabetes guidelines can guide patients in self-care and nursing" is the facilitating factor. Besides, the selection trend for the option of "Guidelines have a high level of evidence and is convincing" among all physicians in different level hospitals is statistically significant. In other words, the results suggested that PCPs (46.07%) paid less attention to the evidence level of guidelines, compared with TCPs (71.80%) and SCPs (67.43%).

As for barriers to guideline implementation, the majority of physicians in different level hospitals (TCPs 68.76%, SCPs 68.73% and PCPs 61.52%) listed "there are fewer TCM diabetes guidelines, and it is difficult to access" as a major barrier to TCM diabetes guidelines implementation. In addition, PCPs (65.45%), SCPs (59.93%) and TCPs (52.49%) chose "It takes a lot of time to communicate with patients" as the second common barrier to guideline implementation. Endocrinologists, general practitioners and other physicians also hold similar attitudes towards the above two barriers.

## 4. DISCUSSION

This national survey of 1150 physicians examined the physicians' awareness and adherence to four different diabetes guidelines. Our results provide information on physicians' familiarity to the diabetes guidelines, and also provide real-world evidence on their awareness and practice toward relevant content in these guidelines as well as the facilitating factors and barriers in guideline implementation.

The main finding of this study is that the level of familiarity and adherence to the diabetes guidelines

varied with different clinician titles and specialties. Overall, the TCPs and endocrinologists had the highest familiarity and adherence to the four diabetes guidelines, followed by SCPs and PCPs. These differences may be attributed to additional training in diabetes management for the TCPs / endocrinologists than PCPs<sup>[18]</sup>. In particular, the results suggested that the PCPs' familiarity and adherence to all the four guidelines is relatively poor and need to be improved, especially to the T2DM guideline issued by CDS which is essential for guiding clinical practice in China<sup>[19]</sup>. Moreover, when evaluating physicians' self-reported familiarity and adherence to different diabetes guidelines, we found that there was a significant discrepancy between western medicine guidelines and TCM guidelines. Indeed, physicians' reference rate for western medical guidelines was twice of that for TCM guidelines. These differences may arise from several factors, including the relatively late establishment of TCM diabetes guidelines, the complicate characteristics of the TCM syndrome differentiation, and high degree of relies on their clinical experience during treatment by most TCM physicians<sup>[20, 21]</sup>. Therefore, it is necessary to conduct studies focusing on the TCM diabetes guidelines in the future.

It is well known that T2DM is a complex chronic disease, treatment of which should be managed through multiple interventions. For the treatment of diabetes, in addition to the medication treatment, SMBG, diet management, increasing physical activity, and health education management are all essential components<sup>[22]</sup>. These management measurements were emphasized in each diabetes guideline and were known by many physicians as "five carriages" management in China<sup>[15]</sup>. In our survey, physicians' awareness and practice of content from diabetes guidelines were designed based on "five carriages" management.

In terms of dietary management for diabetes, the result showed that less than one-third of physicians (30.26%) choose "Hand over to a special nutritionist or professional nutrition team". In addition, the results suggested that more than half (54.03%) of PCPs "only give medical advice of paying attention to diet simply to patients due to the limited time". However, "Patients with T2DM or pre-diabetes need to receive individualized medical nutrition guidance, which should be performed under the guidance of nutritionists (physicians) or comprehensive management teams (including diabetes educators) familiar with the nutritional treatment for

1 diabetes” in the guidelines was a strong recommendation<sup>[13]</sup>. Therefore, it is necessary to train and guide PCPs  
2  
3 in dietary management for diabetes.  
4

5 For the physical exercise guidance for diabetes, most physicians have chosen the "Personally evaluate the  
6  
7 athletic ability of patients and give detailed physical exercise suggestions", and more than 40% of physicians  
8  
9 reported that they would recommend patients to adopt TCM-related exercise methods such as Tai Chi and  
10  
11 Baduanjin. But surprisingly, we found that more than a third of the physicians from different level hospitals  
12  
13 have chosen "increase exercise and improve physical fitness for those with frequent hypoglycemia". It's well  
14  
15 known that exercise is forbidden for diabetics in the case of severe hypoglycemia, the physical exercise can  
16  
17 only be gradually adopted after hypoglycemia is controlled and stabilized<sup>[14, 23]</sup>. These data suggested that there  
18  
19 is a big gap between clinical practice and guidelines, a previous study conducted by Johanna Fürthauer in  
20  
21 Austria also reported similar results<sup>[24]</sup>.  
22  
23  
24  
25  
26  
27

28 As for SMBG instruction and health education management, our survey showed that the majority of  
29  
30 physicians have instructed patients to conduct SMBG and reported that they were equipped with diabetes health  
31  
32 management team, which is comparatively ideal. However, the result varied among physicians in different  
33  
34 hospitals or specialties. Additionally, regarding the knowledge identification for hypoglycemia and TCM  
35  
36 differentiation treatment, the result of this survey suggested that some physicians may not master the guideline  
37  
38 contents well enough, particularly about 40% of physicians' judgment on hypoglycemia is inaccurate or  
39  
40 omitted. Therefore, continuing education and training for physicians in all levels of hospitals are needed and it  
41  
42 will help improve the management of diabetes in China<sup>[19]</sup>.  
43  
44  
45  
46  
47  
48

49 Regarding the facilitating factors to diabetes guidelines' implementation, most physicians hold the opinion  
50  
51 that “Guidelines can standardize clinical behavior and improve medical quality” is one of the main facilitating  
52  
53 factors according to our survey results, which indicated that the significance of guidelines is recognized by  
54  
55 majority of physicians<sup>[25]</sup>. Other facilitating factors of adherence to diabetes guidelines selected by all groups of  
56  
57 physicians included guiding patients in self-care and nursing, and having a high level of evidence, etc.  
58  
59  
60

1 Although our study reveals important insights regarding facilitating factors in the implementation of guidelines,  
2  
3 some barriers to guideline implementation must be considered. The result indicated that a major barrier to the  
4  
5 implementation of TCM diabetes guidelines is that “There are fewer TCM diabetes guidelines, and it is difficult  
6  
7 to access”. Indeed, a previous study illustrated that the establishment of TCM guidelines is relatively late, to  
8  
9 date, there is no TCM practice guideline specifically applicable to the management of diabetes for primary  
10  
11 healthcare and further researches focusing on the TCM diabetes guidelines are expected<sup>[20]</sup>, and it is essential to  
12  
13 publish these guidelines on multiple platforms even free platforms so that all physicians can download and  
14  
15 study these guidelines.  
16  
17  
18  
19

### 20 21 **Strengths and limitations**

22  
23 This study has several strengths. Firstly, this nationally representative questionnaire survey provided  
24  
25 reliable data on the physicians’ awareness and adherence to several Chinese and international diabetes  
26  
27 guidelines. Our analysis sample covered 192 cities in 30 provinces in China including physicians located in  
28  
29 different medical institutions and departments, which are highly representative. Secondly, we conducted a  
30  
31 stratified analysis of the survey samples to obtain more specific and sufficient results, including the  
32  
33 stratification of physicians in different medical institutions and physicians in different departments. Thirdly, in  
34  
35 addition to the self-reported awareness and adherence questionnaire items, we also designed a broad range of  
36  
37 specific questions that included multiple key recommendations within the current guidelines, including SMBG,  
38  
39 dietary guidance, physical exercise guidance, diabetes health education management, hypoglycemia, and TCM  
40  
41 syndrome differentiation to evaluate the physicians’ awareness to contents in the guidelines. Our findings could  
42  
43 provide the latest evidence for future studies of diabetes guidelines in China.  
44  
45  
46  
47  
48  
49  
50

51  
52 Our study also has some limitations. Firstly, although the sample is representative of Chinese medical  
53  
54 physicians and a substantial number of physicians participated (>1000), the findings cannot be automatically  
55  
56 applied to other countries. Secondly, we have not examined whether awareness of physicians, adoption of  
57  
58 physicians, and barriers to treatment varied in age, gender, education, or number of diabetic patients received  
59  
60

1 by the physician per week. A further analysis focusing on the influencing factor of physicians' compliance with  
2 diabetes guidelines will be carried out in future research. Finally, although we have designed some  
3 multiple-choice questions to investigate more information, the survey questionnaire has not been generalizable  
4 to the physicians' awareness of all specific contents of the diabetes guidelines.  
5  
6  
7  
8  
9

## 10 **5. CONCLUSION**

11  
12  
13 In conclusion, the level of familiarity and adherence to the screening guidelines varied among physicians  
14 with different clinician titles and specialties. Overall, the TCPs and endocrinologists had the highest familiarity  
15 and adherence to diabetes guidelines. The PCPs' familiarity and adherence to all the four guidelines is relatively  
16 poor and need to be improved. In addition, there is a gap between clinical practice and guidelines in terms of  
17 physicians' self-reported adherence and practice of diabetes guidelines. Therefore, continuing education and  
18 training for physicians in all levels of hospitals, especially for PCPs are essential. Of note, there was a  
19 significant discrepancy between western medicine guidelines and TCM guidelines, and further studies focusing  
20 on the TCM diabetes guidelines are needed.  
21  
22  
23  
24  
25  
26  
27  
28  
29  
30  
31  
32

33  
34 **Acknowledgement** This work was carried out by the Specialist Committee for Primary Diabetes Care of China  
35 Association of Chinese Medicine, majority of physicians as members of the Specialist Committee for Primary  
36 Diabetes Care have participated in the survey questionnaire. We would like to express our gratitude to all the  
37 participating physicians.  
38  
39  
40  
41  
42  
43

44 **Contributors** Li-yan Jia, Shu-yu Yang designed the research and took full responsibility for the work as a  
45 whole. Li-yan Jia designed the survey questionnaire, Neng-jiang Zhao, Shun-qin Wang, Bing Yan, Jian-ping  
46 Liu were all involved in critically revising the questionnaire and provided valuable advice for designing the  
47 study. Neng-jiang Zhao, Zhi-hai Zhang, Le Li, Na Zhan, Yuan-bing Lin, Miao-na Cai, participated in  
48 questionnaire distribution and collection. Na Zhan, Yuan-bing Lin participated in questionnaire data checking.  
49 Li-yan Jia analyzed and interpreted the data, and wrote the paper. Bao-yong Lai, Cao-xin Huang, Jian-ping Liu,  
50 Shu-yu Yang contributed to critically revising the manuscript.  
51  
52  
53  
54  
55  
56  
57  
58  
59  
60

**Funding** This study was supported by the fund from the State Administration of Traditional Chinese Medicine primary care service project in 2021 “Formulating the guideline for diabetes prevention and treatment in primary care” (No. (2021) 141) and the Fujian Traditional Chinese Medicine Research Project “Investigation on the Current Situation of the Development of Traditional Chinese Medicine in Xiamen Third level General Hospital” (2021zyg178). Shuyu Yang was partially supported by the National Famous Traditional Chinese Medicine Expert Inheritance Studio Construction Project (No. (2022) 75).

### **Conflict of interest**

All authors declare that they have no conflicts of interest.

**Ethics approval** The study was provided expedited review and approval by the medical ethics committee of the First Affiliated Hospital of Xiamen University.

### **Reference**

- [1] GBD 2016 Disease and Injury Incidence and Prevalence Collaborators. Global, regional, and national incidence, prevalence, and years lived with disability for 328 diseases and injuries for 195 countries, 1990-2016: a systematic analysis for the Global Burden of Disease Study 2016. *Lancet*. 2017;390(10100):1211-1259.
- [2] Qian W, Xu Z, Li F, et al. Prevalence, awareness, treatment and control of diabetes mellitus among middle-aged and elderly people in a rural Chinese population: A cross-sectional study[J]. *PLoS One*. 2018;13(6):e0198343.
- [3] NCD Risk Factor Collaboration (NCD-RisC). Worldwide trends in diabetes since 1980: a pooled analysis of 751 population-based studies with 4.4 million participants. *Lancet*. 2016;387(10027):1513-1530.
- [4] Yongze L, Di T, Xiaoguang S, et al. Prevalence of diabetes recorded in mainland China using 2018 diagnostic criteria from the American Diabetes Association: national cross sectional study. *BMJ*. 2020;369:m997.
- [5] China Center for Disease Control and Prevention, China Center for Disease Control and Prevention Center



- 1 for chronic non-communicable diseases. Monitoring report on chronic diseases and their risk factors in China  
2  
3 2013. Beijing: Military Medical Sciences Publishing House.2016:5.  
4  
5 [6] Yuchen Q, Rui W, Xiuqiang M, et al. Prevalence, Awareness, Treatment and Control of Diabetes  
6  
7 Mellitus-A Population Based Study in Shanghai, China. *Int J Environ Res Public Health*. 2016;13(5):512.  
8  
9  
10 [7] Board on Health Care Services, Committee on Standards for Developing Trustworthy Clinical Practice  
11  
12 Guidelines, Robin Graham, et al. Clinical Practice Guidelines we can trust. *Institute of Medicine*. 2011:26.  
13  
14 [8] Lori M, Allison H L, Emelia J B, et al. National study of physician awareness and adherence to  
15  
16 cardiovascular disease prevention guidelines. *Circulation*. 2005;111(4):499-510.  
17  
18  
19 [9] Michelle M C, Lara J A, Paivi M S, et al. Use of national asthma guidelines by allergists and  
20  
21 pulmonologists: a national survey. *J Allergy Clin Immunol Pract*. 2020;8(9):3011-3020.e2.  
22  
23  
24 [10] Sperati C J, Soman S, Agrawal V, et al. Primary care physicians' perceptions of barriers and facilitators to  
25  
26 management of chronic kidney disease: A mixed methods study[J]. *PLoS One*. 2019;14(8):e0221325.  
27  
28  
29 [11] Michael D C, Cynthia S R, Neil R P, et al. Why don't physicians follow clinical practice guidelines? A  
30  
31 framework for improvement. *JAMA*. 1999;282(15): 1458-65.  
32  
33  
34 [12] Indah S W, Yolanda van der G, Pradana S, et al. Awareness, agreement, adoption and adherence to type 2  
35  
36 diabetes mellitus guidelines: a survey of Indonesian primary care physicians. *BMC Fam Pract*. 2014;15:72.  
37  
38  
39 [13] Chinese Diabetes Society. Guideline for the prevention and treatment of type 2 diabetes mellitus in China  
40  
41 (2020 edition). *Chin J Diabetes Mellitus*. 2021;13(04): 315-409.  
42  
43  
44 [14] Chinese Diabetes Society, National Office for Primary Diabetes Care. National guidelines for the  
45  
46 prevention and control of diabetes in primary care (2022). *Chin J Intern Med*. 2022; 61(03):249-262.  
47  
48  
49 [15] Xiaolin T, Ximing L, Junping W, et al. Guidelines for prevention and treatment of diabetes in Chinese  
50  
51 Medicine. *Chinese Medicine Modern Distance Education of China*.2011;9(04):148-151.  
52  
53  
54 [16] American Diabetes Association Professional Practice Committee. Improving Care and Promoting Health  
55  
56 in Populations: Standards of Medical Care in Diabetes-2022. *Diabetes Care*. 2022;45(Suppl 1):S8-S16.  
57  
58  
59  
60



- [17] Huang Q, Xu X, Shou J, et al. Study on related factors of low control rate of general practitioner in type 2 diabetes mellitus. *Journal of Nantong University (Medical Sciences)*. 2017;37(6):514-516.
- [18] Batais MA, Almigbal TH, Bin Abdulhak AA, et al. Assessment of physicians' awareness and knowledge of familial hypercholesterolemia in Saudi Arabia: Is there a gap? *PLoS One*. 2017;12(8):e0183494.
- [19] Ji L, Newman J, Lu J, et al. Understanding the standard of care in the treatment of type 2 diabetes in China: results from a national survey. *Chin Med J (Engl)*. 2014;127(20):3524-3529.
- [20] Jiao Y, Liu J, Jiang L, et al. Guidelines on common cold for traditional Chinese medicine based on pattern differentiation. *J Tradit Chin Med*. 2013;33(4):417-422.
- [21] Dou Z, Xia Y, Zhang J, et al. Syndrome Differentiation and Treatment Regularity in Traditional Chinese Medicine for Type 2 Diabetes: A Text Mining Analysis. *Front Endocrinol (Lausanne)*. 2021;12:728032.
- [22] American Diabetes Association. Prevention or Delay of Type 2 Diabetes: Standards of Medical Care in Diabetes-2021. *Diabetes Care*. 2021;44(Suppl 1):S34-S39.
- [23] American Diabetes Association Professional Practice Committee. Facilitating Behavior Change and Well-being to Improve Health Outcomes: Standards of Medical Care in Diabetes-2022. *Diabetes Care*. 2022;45(Suppl 1):S60-S82.
- [24] Fürthauer J, Flamm M, Sönnichsen A. Patient and physician related factors of adherence to evidence based guidelines in diabetes mellitus type 2, cardiovascular disease and prevention: a cross sectional study. *BMC Fam Pract*. 2013;14:47.
- [25] Lang JK, Paykel MS, Haines KJ, et al. Clinical practice guidelines for early mobilization in the ICU: a systematic review. *Crit Care Med*. 2020;48(11):e1121-e1128.

## Figure legends

Figure1. Physicians' familiarity with four diabetes guidelines (the CDS T2DM guideline, the CDS national primary care diabetes guideline, the CACM TCM diabetes guideline, the ADA diabetes guideline). (A) Analysis based on the groups of physicians in different level hospitals. (B) Additional analysis based on the

1 groups of physicians in different professional physicians. *Note.* ADA, the American Diabetes Association;  
2  
3 CDS, the Chinese Diabetes Society; TCM, traditional Chinese medicine; CACM, the China Association of  
4  
5 Chinese Medicine.  
6

## 8 **Supporting information**

10 Appendix1. Physicians demographic and profession characteristics

12 Appendix2. Recommendations excerpted from the diabetes guidelines

14 Appendix3. Facilitating factors and barriers to diabetes guideline implementation

16 Appendix4. Original drawing of Figure 1

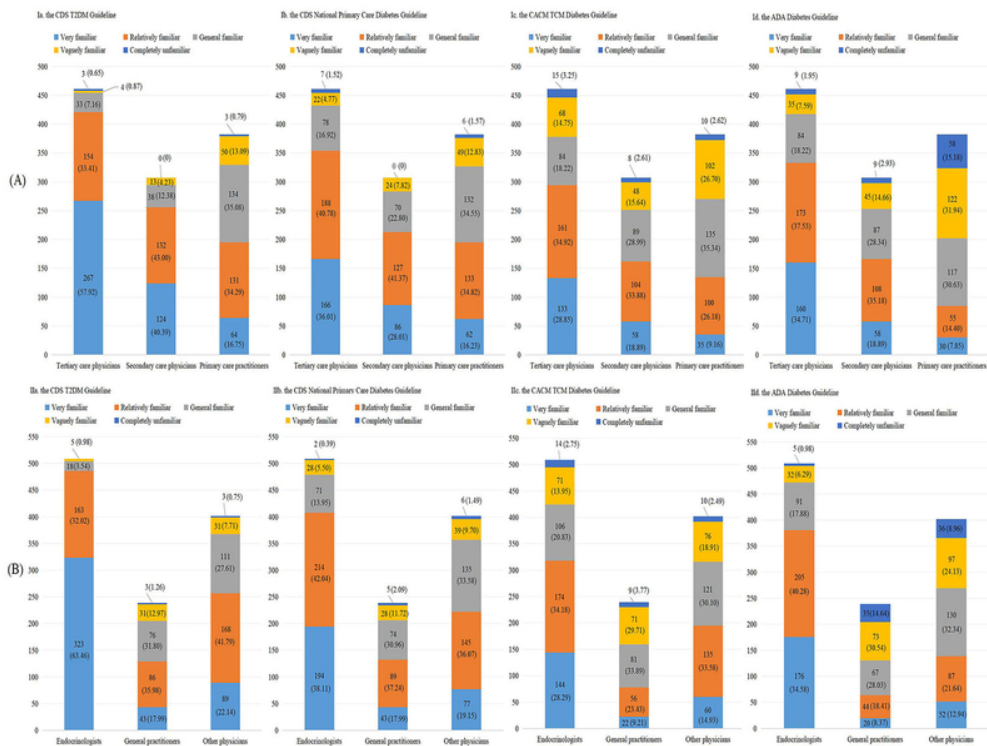

Figure 1. Physicians' familiarity with four diabetes guidelines

67x50mm (300 x 300 DPI)

Appendix 1. Physicians demographic and profession characteristics [n(%)]

| Variable                                  | Physicians in different level hospitals |                                        |                                         | P-value |
|-------------------------------------------|-----------------------------------------|----------------------------------------|-----------------------------------------|---------|
|                                           | Tertiary care physicians<br>(n = 461)   | Secondary care physicians<br>(n = 307) | Primary care practitioners<br>(n = 382) |         |
| Age (mean years $\pm$ s.d.)               | 40.82 $\pm$ 9.21                        | 40.42 $\pm$ 8.78                       | 41.27 $\pm$ 8.13                        | 0.215   |
| Male gender                               | 189 (41.00)                             | 158 (51.47)                            | 209 (54.71)                             | < 0.001 |
| Education level                           |                                         |                                        |                                         | < 0.001 |
| Technical secondary and below             | 0 (0)                                   | 1 (0.33)                               | 35 (9.16)                               |         |
| College degree                            | 7 (1.52)                                | 17 (5.54)                              | 107 (28.01)                             |         |
| Bachelor degree                           | 169 (36.66)                             | 231 (75.24)                            | 213 (55.76)                             |         |
| Master degree                             | 222 (48.16)                             | 58 (18.89)                             | 26 (6.81)                               |         |
| Doctoral degree                           | 63 (13.67)                              | 0 (0)                                  | 1 (0.26)                                |         |
| Professional category                     |                                         |                                        |                                         | < 0.001 |
| TCM                                       | 135 (29.28)                             | 76 (24.76)                             | 88 (23.04)                              |         |
| Integrated TCM and WM                     | 137 (29.72)                             | 89 (28.99)                             | 81 (21.20)                              |         |
| Modern clinical medicine                  | 188 (40.78)                             | 140 (45.60)                            | 200 (52.36)                             |         |
| Other categories                          | 1 (0.22)                                | 2 (0.65)                               | 13 (3.40)                               |         |
| Years in practice (mean years $\pm$ s.d.) | 15.50 $\pm$ 9.82                        | 15.12 $\pm$ 9.00                       | 17.30 $\pm$ 9.05                        | 0.001   |
| Technical title                           |                                         |                                        |                                         | < 0.001 |
| Junior (Resident physicians)              | 71 (15.40)                              | 53 (17.26)                             | 170 (44.50)                             |         |
| Intermediate (Attending physicians)       | 131 (28.42)                             | 121 (39.41)                            | 137 (35.86)                             |         |
| Sub-senior (Associate chief physicians)   | 138 (29.93)                             | 92 (29.97)                             | 67 (17.54)                              |         |
| Senior (Chief physicians)                 | 121 (26.25)                             | 41 (13.36)                             | 8 (2.09)                                |         |
| Diabetes practice setting                 |                                         |                                        |                                         | < 0.001 |
| Department of endocrinology and diabetes  | 327 (70.93)                             | 171 (55.70)                            | 11 (2.88)                               |         |
| Department of general practice            | 14 (3.04)                               | 13 (4.23)                              | 212 (55.50)                             |         |
| Other departments                         | 120 (26.03)                             | 123 (40.07)                            | 159 (41.63)                             |         |
| Number of DM patients (per week)          |                                         |                                        |                                         | < 0.001 |
| None                                      | 4 (0.87)                                | 2 (0.65)                               | 9 (2.36)                                |         |
| 1 ~ 10                                    | 99 (21.48)                              | 75 (24.43)                             | 163 (42.67)                             |         |
| 11 ~ 50                                   | 133 (28.85)                             | 120 (39.09)                            | 150 (39.27)                             |         |
| 51 ~ 100                                  | 115 (24.95)                             | 60 (19.54)                             | 44 (11.52)                              |         |
| 101 ~ 300                                 | 98 (21.26)                              | 36 (11.73)                             | 15 (3.93)                               |         |
| $\geq$ 301                                | 12 (2.6)                                | 14 (4.56)                              | 1 (0.26)                                |         |

Note. TCM, traditional Chinese medicine; WM, western medicine; DM, diabetes mellitus.



- 1  
2  
3  
4  
5  
6  
7  
8  
9  
10  
11  
12  
13  
14  
15  
16  
17  
18  
19  
20  
21  
22  
23  
24  
25  
26  
27  
28  
29  
30  
31  
32  
33  
34  
35  
36  
37  
38  
39  
40  
41  
42  
43  
44  
45  
46  
47  
48  
49  
50  
51  
52  
53  
54  
55  
56  
57  
58  
59  
60
- ①Physical exercise intervention should be carried out under the guidance of relevant professionals. Recommendation
- ②Necessary health evaluation and exercise ability evaluation should be evaluated to ensure the safety and rationality of exercise therapy. Recommendation
- ③Physical exercise should be forbidden under severe hypoglycemia, which can be gradually resumed after the condition is controlled and stabilized. Recommendation
- ①Hypoglycemia classification  
Grade 1 hypoglycemia:  $3.0 \text{ mmol/l} \leq \text{Blood glucose} < 3.9 \text{ mmol/l}$ ; Grade 2 hypoglycemia:  $\text{Blood glucose} < 3.0 \text{ mmol/l}$ ; Grade 3 hypoglycemia: Hypoglycemia with no specific blood glucose limit, accompanied by serious events of consciousness and / or physical changes, and requiring help from others. Recommendation
- ②The clinical manifestations of hypoglycemia are related to the level of blood glucose and the decline rate of blood glucose, it can be manifested as sympathetic excitement (such as palpitations, anxiety, sweating, dizziness, handshaking, hunger sensation, etc.) and central nervous symptoms (such as mental changes, cognitive impairment, convulsions, and coma). Recommendation
- ①The treatment of Qi-Yin deficiency syndrome in type 2 diabetes, Jinlida granule and Shenqi Jiangtang granule can be combined use with routine treatment. Recommendation
- ②Shengmai Powder adds or subtraction can be used to alleviate the symptoms of fatigue and Qi-Yin deficiency syndrome in patients with diabetes. Recommendation
3. Physical exercise management
4. Hypoglycemia
5. Diabetes with Qi-Yin deficiency syndrome

1  
2  
3  
4 ③For the early and middle stages of type 2 diabetes,  
5  
6 Gegen Qinlian decoction can be taken orally for  
7  
8 intestinal-damp-heat syndrome; Dachaihu Decoction Recommendation  
9  
10 can be taken orally for the stagnated-heat in liver and  
11  
12 stomach syndrome.

13 6. Diabetic ①For diabetic neuropathy patients with  
14 neuropathy with Qi-deficiency and collateral-obstruction syndrome,  
15 Qi-deficiency and Mudan granule can be taken orally, combined with Recommendation  
16 collateral-obstruction syndrome  
17 acupuncture and fumigation to improve symptoms.  
18  
19  
20  
21  
22  
23  
24  
25  
26  
27  
28  
29  
30  
31  
32  
33  
34  
35  
36  
37  
38  
39  
40  
41  
42  
43  
44  
45  
46  
47  
48  
49  
50  
51  
52  
53  
54  
55  
56  
57  
58  
59  
60

---

Appendix3. Facilitating factors and barriers to diabetes guideline implementation [n(%)]

| Categories                                                                       | Overall<br>(n = 1150) | Physicians in different level hospitals  |                                           |                                            | <i>P</i> -value | Physicians in different departments |                                       |                                  | <i>P</i> -value |
|----------------------------------------------------------------------------------|-----------------------|------------------------------------------|-------------------------------------------|--------------------------------------------|-----------------|-------------------------------------|---------------------------------------|----------------------------------|-----------------|
|                                                                                  |                       | Tertiary care<br>physicians<br>(n = 461) | Secondary care<br>physicians<br>(n = 307) | Primary care<br>practitioners<br>(n = 382) |                 | Endocrinologists<br>(n = 509)       | General<br>practitioners<br>(n = 239) | Other<br>physicians<br>(n = 402) |                 |
| Facilitating factors                                                             |                       |                                          |                                           |                                            |                 |                                     |                                       |                                  |                 |
| The guideline can standardize clinical behavior and improve medical quality      | 1100 (95.65)          | 443 (96.10)                              | 298 (97.07)                               | 359 (93.98)                                | 0.118           | 496 (97.45)                         | 229 (95.82)                           | 375 (93.28)                      | 0.009           |
| Guide patients in self-care and nursing                                          | 907 (78.87)           | 359 (77.87)                              | 247 (80.46)                               | 301 (78.80)                                | 0.691           | 398 (78.19)                         | 186 (77.82)                           | 323 (80.35)                      | 0.662           |
| The guideline has a high level of evidence and is convincing                     | 714 (62.09)           | 331 (71.80)*                             | 207 (67.43)*                              | 176 (46.07)*                               | < 0.001         | 369 (72.50)                         | 115 (48.12)                           | 230 (57.21)                      | < 0.001         |
| The format of the guidelines is standardized and easy for reading                | 657 (57.13)           | 273 (59.22)*                             | 190 (61.89)*                              | 194 (50.79)*                               | 0.007           | 306 (60.12)                         | 124 (51.88)                           | 227 (56.47)                      | 0.100           |
| The guideline can facilitate communication with patients                         | 686 (59.65)           | 260 (56.40)*                             | 201 (65.47)*                              | 225 (58.90)*                               | 0.040           | 301 (59.14)                         | 143 (59.83)                           | 242 (60.20)                      | 0.947           |
| Reduce medical costs                                                             | 627 (54.52)           | 266 (57.70)                              | 169 (55.05)                               | 192 (50.26)                                | 0.095           | 282 (55.40)                         | 113 (47.28)                           | 232 (57.71)                      | 0.032           |
| Barriers                                                                         |                       |                                          |                                           |                                            |                 |                                     |                                       |                                  |                 |
| Restricted the autonomy of doctors                                               | 376 (32.70)           | 155 (33.62)                              | 96 (31.27)                                | 125 (32.72)                                | 0.793           | 163 (32.02)                         | 79 (33.05)                            | 134 (33.33)                      | 0.908           |
| It takes a lot of time to communicate with patients                              | 676 (58.78)           | 242 (52.49)*                             | 184 (59.93)*                              | 250 (65.45)*                               | 0.001           | 287 (56.39)                         | 153 (64.02)                           | 236 (58.71)                      | 0.141           |
| It will cause physicians should take more responsibility for medical malpractice | 239 (20.78)           | 81 (17.57)                               | 69 (22.48)                                | 89 (23.30)                                 | 0.087           | 88 (17.29)                          | 51 (21.34)                            | 100 (24.88)                      | 0.019           |
| There are fewer TCM diabetes guidelines, and it is difficult to access           | 763 (66.35)           | 317 (68.76)                              | 211 (68.73)                               | 235 (61.52)                                | 0.0504          | 342 (67.19)                         | 152 (63.60)                           | 269 (66.92)                      | 0.598           |
| The guideline unable to be downloaded for reading                                | 353 (30.70)           | 153 (33.19)                              | 99 (32.25)                                | 101 (26.44)                                | 0.084           | 163 (32.02)                         | 65 (27.20)                            | 125 (31.09)                      | 0.401           |
| The guideline recommendation lacks basis and can not be convincing               | 276 (24.00)           | 135 (29.28)*                             | 70 (22.80)*                               | 71 (18.59)*                                | 0.001           | 141 (27.70)                         | 51 (21.34)                            | 84 (20.90)                       | 0.032           |



1  
2  
3  
4  
5  
6  
7  
8  
9  
10  
11  
12 (A)  
13  
14  
15  
16  
17  
18  
19  
20  
21  
22  
23  
24  
25  
26  
27  
28  
29

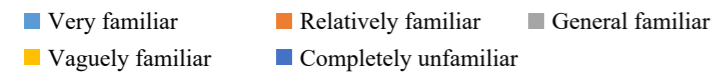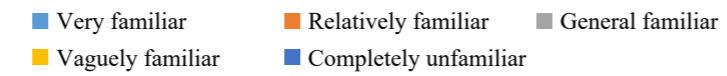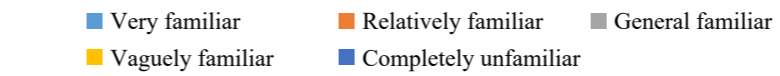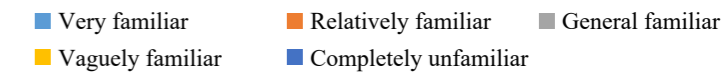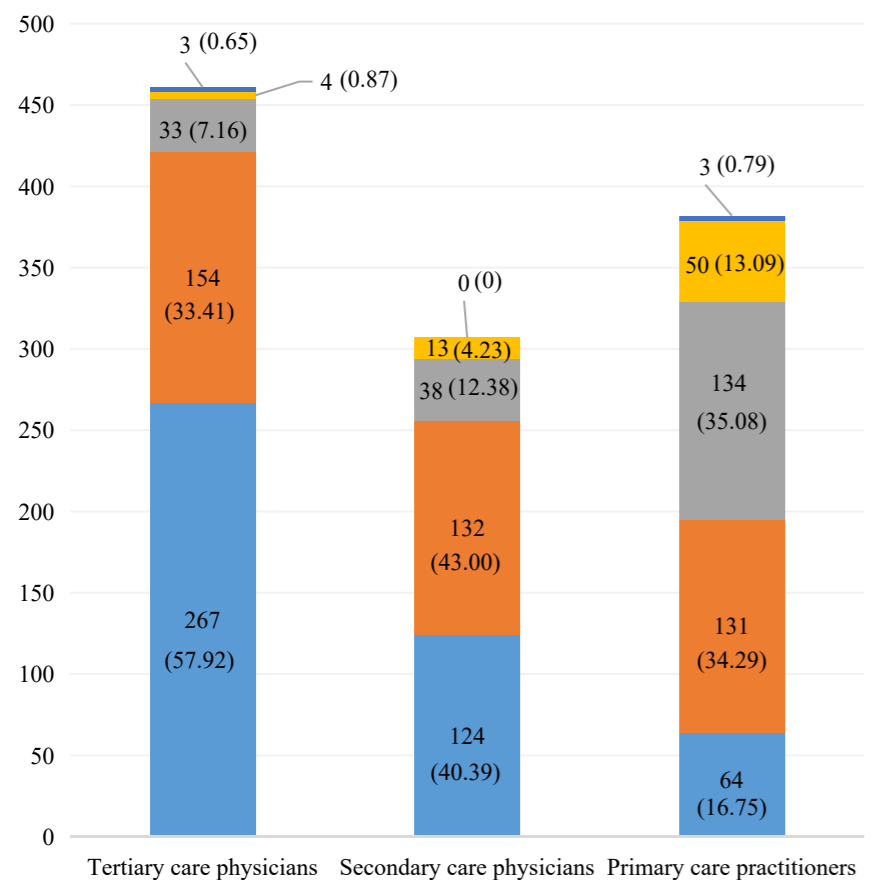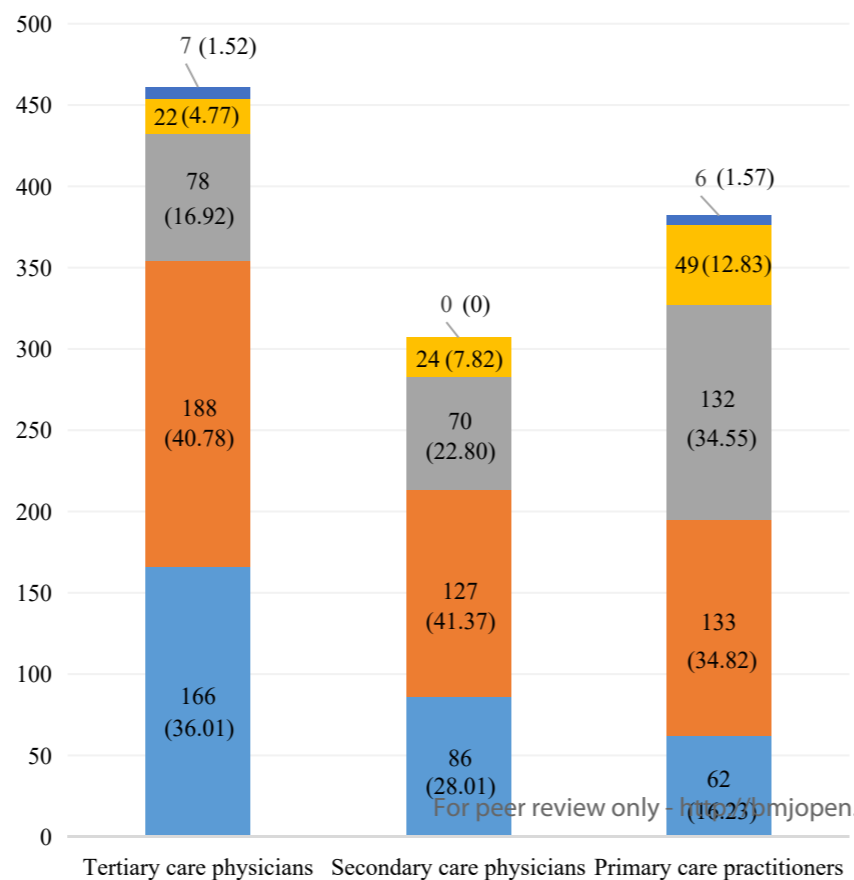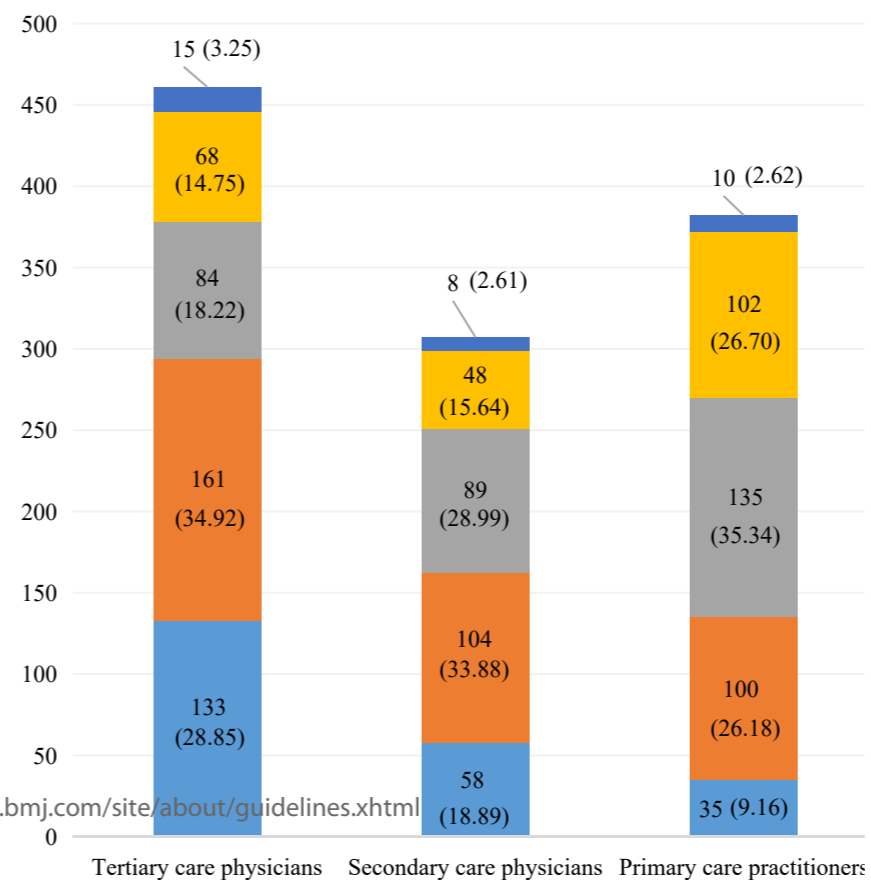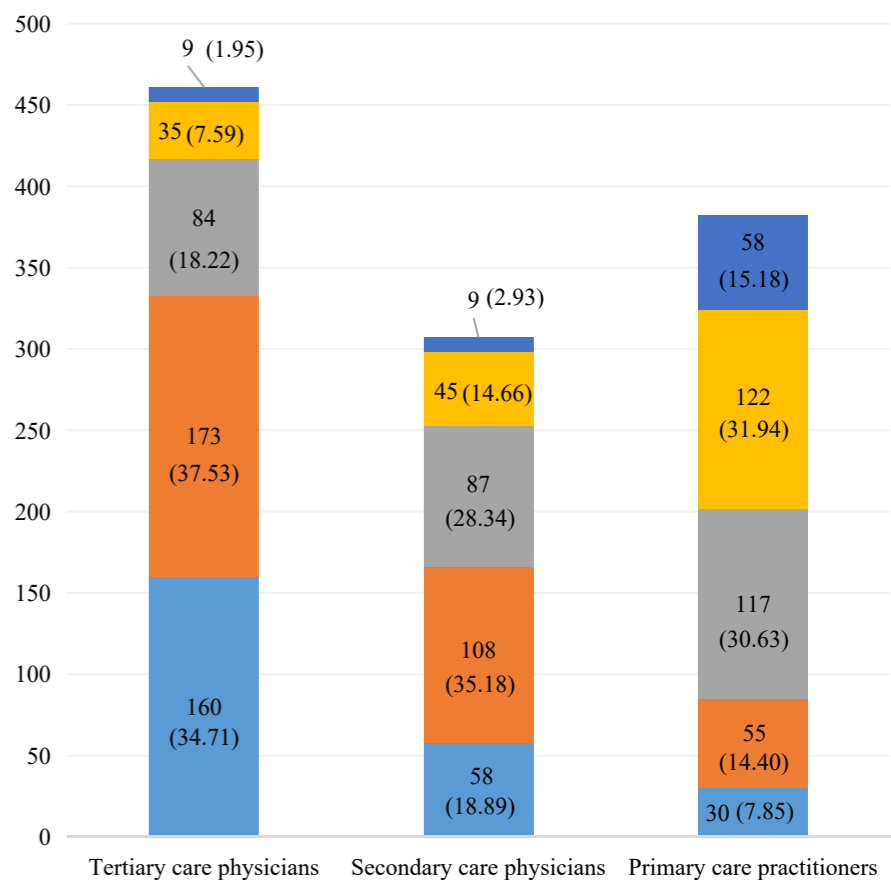

Iia. the CDS T2DM Guideline

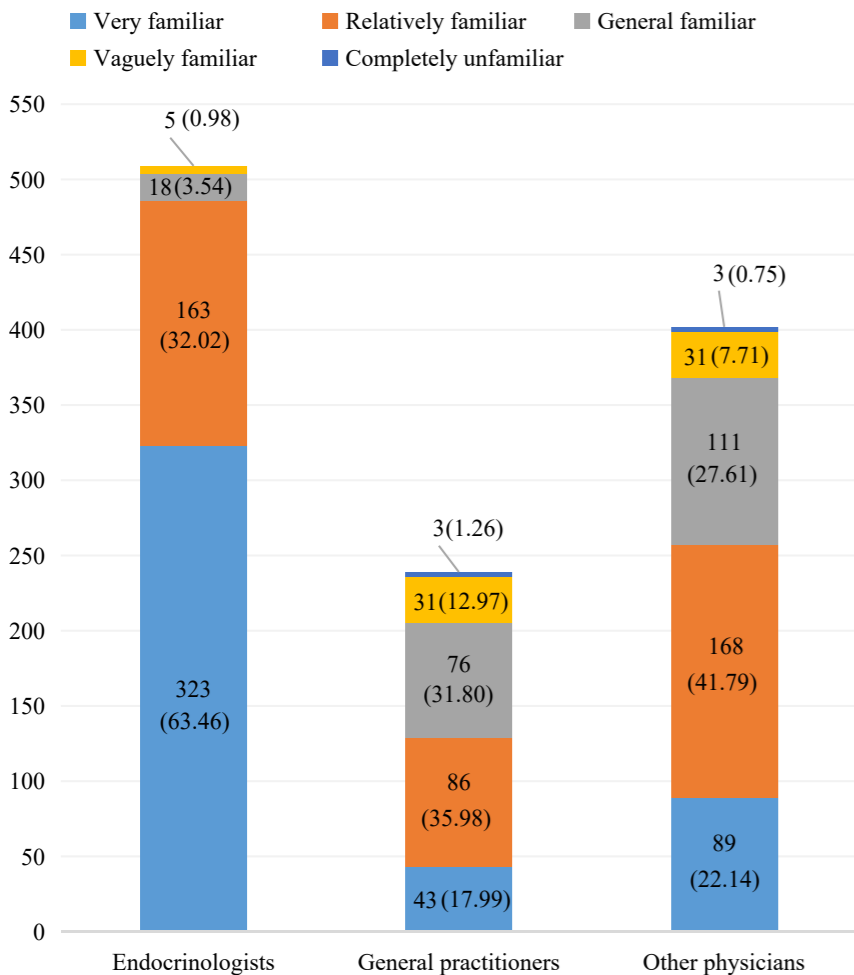

Iib. the CDS National Primary Care Diabetes Guideline

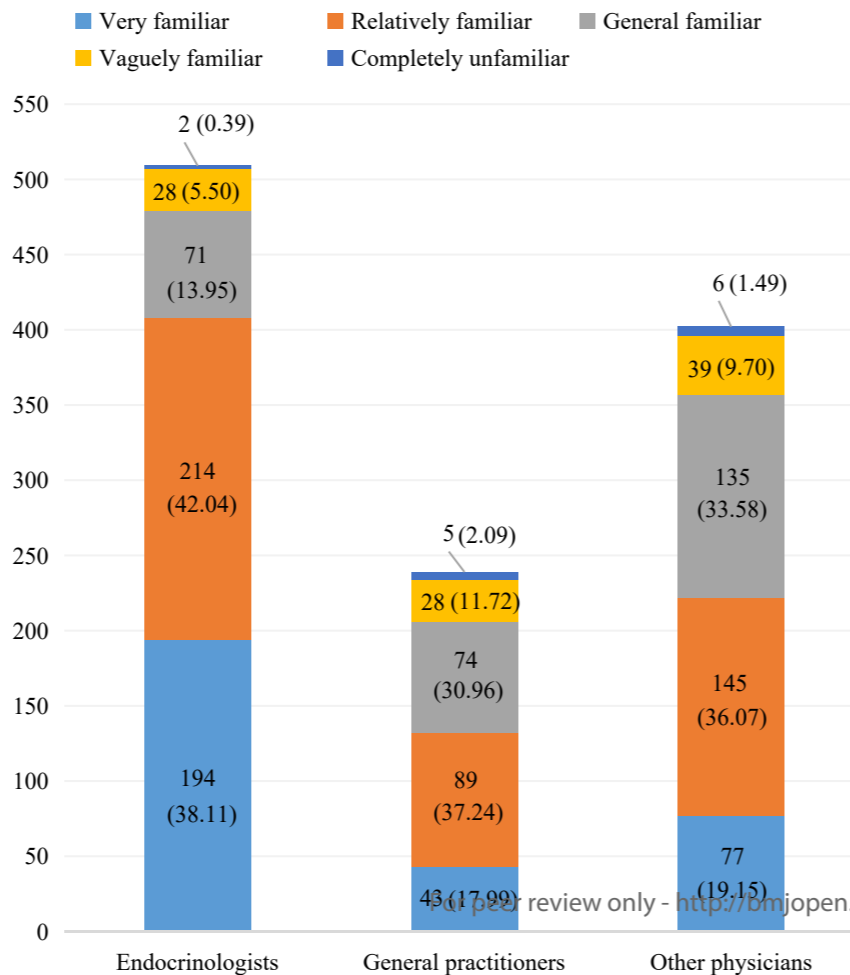

Iic. the CACM TCM Diabetes Guideline

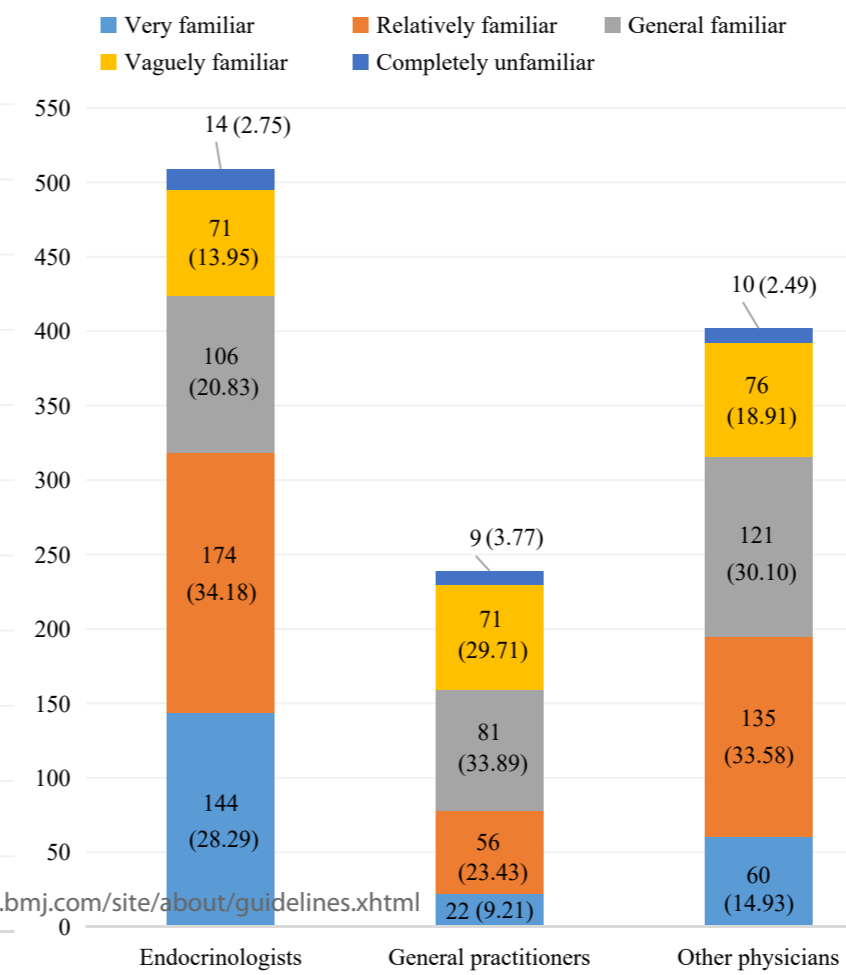

Iid. the ADA Diabetes Guideline

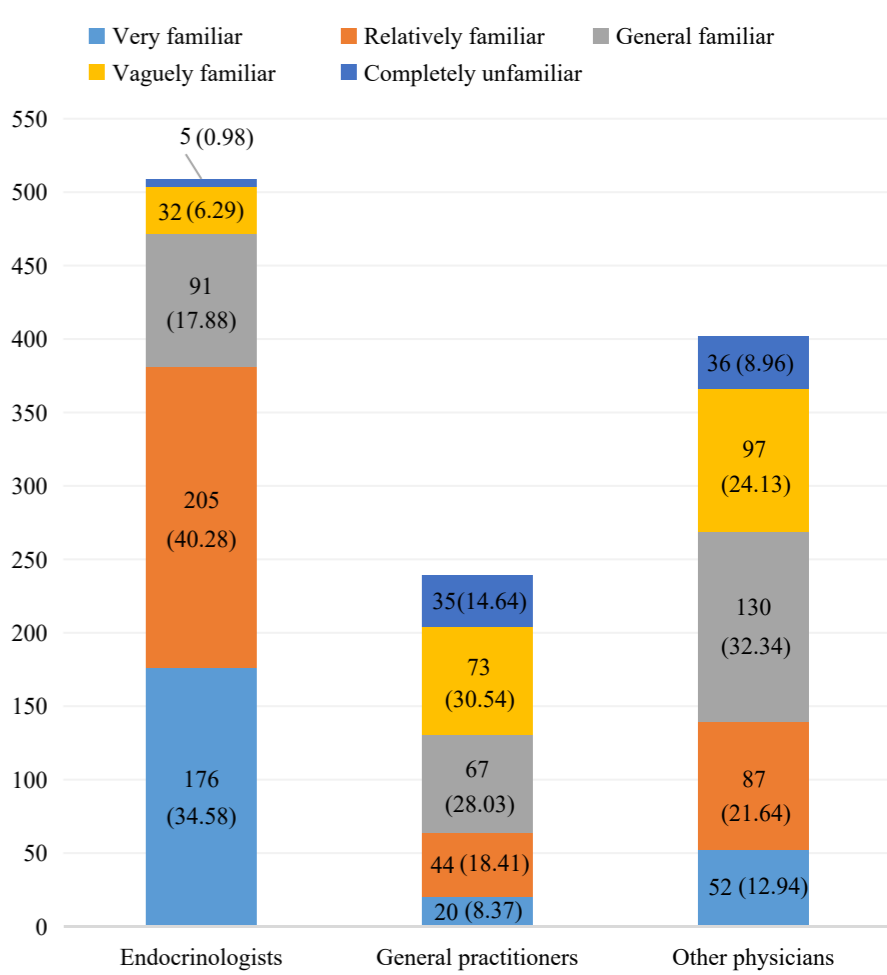

# BMJ Open

## Nationwide Survey of Physicians' Familiarity and Awareness of Diabetes Guidelines in China: A Cross-sectional Study

|                                 |                                                                                                                                                                                                                                                                                                                                                                                                                                                                                                                                                                                                                                                                                                                                                                                                                                                                                                                                                   |
|---------------------------------|---------------------------------------------------------------------------------------------------------------------------------------------------------------------------------------------------------------------------------------------------------------------------------------------------------------------------------------------------------------------------------------------------------------------------------------------------------------------------------------------------------------------------------------------------------------------------------------------------------------------------------------------------------------------------------------------------------------------------------------------------------------------------------------------------------------------------------------------------------------------------------------------------------------------------------------------------|
| Journal:                        | <i>BMJ Open</i>                                                                                                                                                                                                                                                                                                                                                                                                                                                                                                                                                                                                                                                                                                                                                                                                                                                                                                                                   |
| Manuscript ID                   | bmjopen-2023-074301.R1                                                                                                                                                                                                                                                                                                                                                                                                                                                                                                                                                                                                                                                                                                                                                                                                                                                                                                                            |
| Article Type:                   | Original research                                                                                                                                                                                                                                                                                                                                                                                                                                                                                                                                                                                                                                                                                                                                                                                                                                                                                                                                 |
| Date Submitted by the Author:   | 16-Sep-2023                                                                                                                                                                                                                                                                                                                                                                                                                                                                                                                                                                                                                                                                                                                                                                                                                                                                                                                                       |
| Complete List of Authors:       | Jia, Liyan; The First Affiliated Hospital of Xiamen University, Huang, Caoxin; The First Affiliated Hospital of Xiamen University, Xiamen Diabetes Institute<br>Zhao, Neng-jiang; First Affiliated Hospital of Xiamen University<br>Lai, Bao-yong; Beijing University of Chinese Medicine Xiamen Hospital<br>Zhang, Zhi-hai; First Affiliated Hospital of Xiamen University<br>Li, Le; First Affiliated Hospital of Xiamen University<br>Zhan, Na; Fujian University of Traditional Chinese Medicine<br>Yuan-bing, Lin; Fujian University of Traditional Chinese Medicine<br>Cai, Miao-na; First Affiliated Hospital of Xiamen University<br>Wang, Shunqin ; Beijing University of Chinese Medicine Xiamen Hospital<br>Yan, Bing; Xiamen Diabetes Institute,<br>Liu, Jianping; Beijing University of Traditional Chinese Medicine, ; NAFKAM, Department of Community Medicine<br>Yang, Shu-yu; The First Affiliated Hospital of Xiamen University |
| <b>Primary Subject Heading</b>: | Diabetes and endocrinology                                                                                                                                                                                                                                                                                                                                                                                                                                                                                                                                                                                                                                                                                                                                                                                                                                                                                                                        |
| Secondary Subject Heading:      | Diabetes and endocrinology, Medical education and training                                                                                                                                                                                                                                                                                                                                                                                                                                                                                                                                                                                                                                                                                                                                                                                                                                                                                        |
| Keywords:                       | General diabetes < DIABETES & ENDOCRINOLOGY, Physicians, Protocols & guidelines < HEALTH SERVICES ADMINISTRATION & MANAGEMENT                                                                                                                                                                                                                                                                                                                                                                                                                                                                                                                                                                                                                                                                                                                                                                                                                     |
|                                 |                                                                                                                                                                                                                                                                                                                                                                                                                                                                                                                                                                                                                                                                                                                                                                                                                                                                                                                                                   |

SCHOLARONE™  
Manuscripts



I, the Submitting Author has the right to grant and does grant on behalf of all authors of the Work (as defined in the below author licence), an exclusive licence and/or a non-exclusive licence for contributions from authors who are: i) UK Crown employees; ii) where BMJ has agreed a CC-BY licence shall apply, and/or iii) in accordance with the terms applicable for US Federal Government officers or employees acting as part of their official duties; on a worldwide, perpetual, irrevocable, royalty-free basis to BMJ Publishing Group Ltd ("BMJ") its licensees and where the relevant Journal is co-owned by BMJ to the co-owners of the Journal, to publish the Work in this journal and any other BMJ products and to exploit all rights, as set out in our [licence](#).

The Submitting Author accepts and understands that any supply made under these terms is made by BMJ to the Submitting Author unless you are acting as an employee on behalf of your employer or a postgraduate student of an affiliated institution which is paying any applicable article publishing charge ("APC") for Open Access articles. Where the Submitting Author wishes to make the Work available on an Open Access basis (and intends to pay the relevant APC), the terms of reuse of such Open Access shall be governed by a Creative Commons licence – details of these licences and which [Creative Commons](#) licence will apply to this Work are set out in our licence referred to above.

Other than as permitted in any relevant BMJ Author's Self Archiving Policies, I confirm this Work has not been accepted for publication elsewhere, is not being considered for publication elsewhere and does not duplicate material already published. I confirm all authors consent to publication of this Work and authorise the granting of this licence.

# Nationwide Survey of Physicians' Familiarity and Awareness of Diabetes Guidelines in China: A

## Cross-sectional Study

Li-yan Jia<sup>1</sup>, Cao-xin Huang<sup>2</sup>, Neng-jiang Zhao<sup>1</sup>, Bao-yong Lai<sup>3</sup>, Zhi-hai Zhang<sup>1</sup>, Le Li<sup>1</sup>, Na Zhan<sup>4</sup>, Yuan-bing

Lin<sup>4</sup>, Miao-na Cai<sup>1</sup>, Shun-qin Wang<sup>3</sup>, Bing Yan<sup>1</sup>, Jian-ping Liu<sup>5</sup>, Shu-yu Yang<sup>1,6</sup>

1. The First Affiliated Hospital of Xiamen University, Xiamen, China.
2. Xiamen Diabetes Institute, Department of Endocrinology and Metabolism, The First Affiliated Hospital of Xiamen University, Xiamen, China.
3. Beijing University of Chinese Medicine Xiamen Hospital, Xiamen, China.
4. Graduate school, Fujian University of traditional Chinese Medicine, Xiamen, China.
5. Centre for evidence-based Chinese medicine, Beijing University of Chinese Medicine, Beijing, China.
6. Center of integrated Chinese and western medicine, Xiamen University, Xiamen, China.

### Corresponding author:

Shu-yu Yang, MD, PhD, Professor (ORCID: <https://orcid.org/0000-0003-2950-0861>)

The First Affiliated Hospital of Xiamen University;

Center of integrated Chinese and western medicine, Xiamen University;

Xiamen 361003, China

Email: [xmyangshuyu@xmu.edu.cn](mailto:xmyangshuyu@xmu.edu.cn)

Tel: +86 13950062003

**ABSTRACT**

Objective: To investigate physicians' familiarity and awareness of four diabetes guidelines, and their practice of the recommendations outlined in these guidelines.

Design: A cross-sectional study.

Setting: An online questionnaire survey was conducted among physicians affiliated with the Specialist Committee for Primary Diabetes Care of China Association of Chinese Medicine, using the snowball sampling method to ensure a broader representation of physicians.

Participants: 1150 physicians from 192 cities across 30 provinces in China provided complete data.

Results: Tertiary care hospital physicians (TCPs) exhibited the highest familiarity with the *Guideline for the Prevention and Treatment of Type 2 Diabetes Mellitus in China* (91.3%), followed by the *National Guidelines for the Prevention and Control of Diabetes in Primary Care* (76.8%), the *Standards of Medical Care in Diabetes* (72.2%) and the *Guidelines for Prevention and Treatment of Diabetes in Chinese Medicine* (63.8%). Primary care practitioners (PCPs) exhibited familiarity with these four guidelines at about 50% or less. Self-reported reference to modern diabetes guidelines by physicians more frequent than traditional Chinese medicine (TCM) diabetes guidelines, with rates at 73.2% and 33.8%, respectively. Approximately 90% of physicians provided instructions on self-monitoring of blood glucose to their patients with diabetes. Less than one-third of physicians referred patients to a specialized nutritionist. In terms of health education management, TCPs reported having a diabetes health management team at the rate of 75.7%, followed by secondary care hospital physicians (SCPs) at 57.0% and PCPs at 27.5%. Furthermore, approximately 40% of physicians did not fully grasp hypoglycemia characteristics.

Conclusions: Familiarity and awareness of the screening guidelines varied among physicians in different hospital settings. Importantly, significant discrepancies were observed between physicians' awareness and their self-reported reference to modern medicine guidelines and TCM guidelines. It is essential to consistently provide education and training on diabetes management for all physicians, particularly PCPs.

**KEY WORDS:** Diabetes Mellitus; Guidelines; Physician Awareness

**Strengths and limitations of this study**

1 This nationwide questionnaire survey involved 1150 physicians from hospitals of different levels in China, aiming  
2 to analyze the differences in familiarity and awareness of both Chinese and international diabetes guidelines  
3 among different physician groups. The results provided nationally representative evidence regarding physicians'  
4 familiarity and awareness of these guidelines.  
5

6  
7  
8  
9  
10 Apart from the self-reported familiarity and reference questionnaire items, our study also identified several  
11  
12  
13 facilitating factors and barriers to the implementation of diabetes guidelines in different physician groups.  
14  
15 Although we have included multiple-choice questions to gather more comprehensive information, we acknowledge  
16  
17  
18 that the survey questionnaire may not cover all specific aspects related to physicians' awareness of the diabetes  
19  
20  
21 guidelines.  
22

## 23 1. INTRODUCTION

24  
25  
26 Diabetes is a metabolic disorder caused by the interplay of genetic and environmental factors, which has  
27  
28 become a critical global health concern worldwide due to its high prevalence and associated disability and  
29  
30 mortality rates [1,2]. According to the latest data published by International Diabetes Federation (IDF), an  
31  
32 estimated 537 million adults worldwide have been diagnosed with diabetes [3]. China currently bears the  
33  
34 highest burden of diabetes globally, with approximately 141 million individuals living with the disease aged  
35  
36 between 20 and 79 years. Moreover, it is predicted that the number of diabetes cases in China will continue to  
37  
38 grow significantly [4]. However, recent national data on chronic diseases and their risk factors in China indicate  
39  
40  
41 that awareness, treatment, and control rates for diabetes were 36.7%, 32.9%, and 50.1%, respectively, which  
42  
43  
44 have not changed significantly since 2013[5,6]. Therefore, addressing this substantial public health issue is  
45  
46  
47 crucial, with the objective of enhancing the national diabetes awareness rate, treatment rate, and control rate.  
48  
49

50  
51  
52 Clinical practice guidelines (CPGs) are statements that facilitate optimal disease management for health  
53  
54 professionals and patients. However, to ensure effective implementation and adherence to guidelines, it is  
55  
56  
57 crucial to enhance health professionals' familiarity and awareness of CPGs [7]. Previous studies have  
58  
59  
60 emphasized the significance of physician awareness in the successful adoption of cardiovascular disease

1 prevention guidelines, asthma guidelines, chronic kidney disease guidelines, etc [8-10]. A systematic review  
2 identified lack of physician awareness and familiarity with guidelines as the primary factors contributing to  
3 deviation from recommended therapy [11]. Notably, a cross-sectional study highlighted that physicians' lack of  
4 knowledge and patients' unawareness of guidelines could account for about 70% of non-adherence [12].  
5  
6 Therefore, emphasizing physicians' familiarity and awareness of clinical guidelines is essential for optimizing  
7  
8 patient management.

9  
10  
11  
12  
13  
14  
15  
16 Modern medicine plays a crucial role in preventing and treating diabetes, meanwhile, traditional Chinese  
17 medicine (TCM) is increasingly used for the treatment of diabetes in China. Some clinical trials have been  
18 conducted to investigate the beneficial effect of TCM as adjunctive treatment for diabetes, such as reducing  
19 blood sugar, alleviating symptoms, preventing complications, improving quality of life, and promoting tertiary  
20 prevention. Additionally, to effectively enhance the prevention and standardized management of diabetes  
21 mellitus, a series of clinical guideline documents have been released both domestically and internationally.  
22  
23 Including annually updated *Standards of Medical Care in Diabetes* issued by the American Diabetes  
24 Association (ADA) [13], the *Guideline for the Prevention and Treatment of Type 2 Diabetes Mellitus (T2DM)*  
25 *in China* and the *National Guidelines for the Prevention and Control of Diabetes in Primary Care* issued by  
26 Chinese Diabetes Society (CDS), which are updated on average every 3 years [14,15], and the *Guidelines for*  
27 *Prevention and Treatment of Diabetes in Chinese Medicine* issued by China Association of Chinese Medicine  
28 (CACM) [16]. The recommendations for the treatment of diabetes by western medicine and TCM mainly refer  
29 to these guidelines. Therefore, four guidelines mentioned above are considered as the screening guidelines  
30 investigated in this study.

31  
32  
33  
34  
35  
36  
37  
38  
39  
40  
41  
42  
43  
44  
45  
46  
47  
48  
49  
50  
51  
52 To provide nationally representative evidence regarding the familiarity and awareness of physicians with  
53 diabetes guidelines in China, we conducted a nationwide survey to compare physicians' awareness,  
54 self-reported reference status and practice of different diabetes guidelines. Additionally, we examined the  
55 differences among physicians from hospitals at different levels. Furthermore, the facilitating factors and  
56  
57  
58  
59  
60



1 barriers to implementation of diabetes guidelines in different physician groups were identified in this study.

## 2 3 **2. RESEARCH DESIGN AND METHODS**

### 4 5 **2.1 Survey design**

6  
7  
8 This is an investigator-initiated, non-commercial survey of physicians at various levels of hospitals in  
9  
10 China. This work was conducted by the Specialist Committee for Primary Diabetes Care of China Association  
11  
12 of Chinese Medicine, a national academic institution. A majority of physicians who are members of the  
13  
14 Specialist Committee participated in the survey questionnaire. The questionnaire was distributed electronically  
15  
16 to the participants, and electronic written informed consent from respondents was required before proceeding  
17  
18 with the survey. Additionally, participants were requested to assist in forwarding the questionnaire to other  
19  
20 general practitioners, physicians, and experts using the snowball sampling method. In the overall design of this  
21  
22 survey, we aimed to ensure broader representation of respondents by recruiting physicians from different grades  
23  
24 of hospitals in China, including tertiary to primary medical institutions. Additionally, the endocrinology  
25  
26 diabetes specialists, general practitioners, and TCM physicians were mainly recruited.  
27  
28  
29  
30  
31  
32

### 33 34 **2.2 Questionnaire and pretest**

35  
36 A questionnaire comprising four sections was established with a total of 42 items. Section I assessed  
37  
38 participants' clinical background and basic demographic data. Section II evaluated participants' familiarity with  
39  
40 and self-reported reference status regarding various diabetes guidelines, presented as single-choice questions in  
41  
42 the form of Likert scales. Section III examined participants' awareness and practice of specific measures  
43  
44 outlined in diabetes guidelines, accompanied by a list of guideline-based recommendations provided in  
45  
46 Appendix 1. The guideline action statements were rephrased as options in both single-choice and  
47  
48 multiple-choice formats, enabling respondents to choose the most appropriate answers. Lastly, section IV  
49  
50 investigated the facilitating factors and barriers during the process of guideline implementation.  
51  
52  
53  
54  
55  
56

57 The questionnaire underwent a pilot test involving 24 physicians from Fujian and Gansu provinces in  
58  
59 China from Aug 20, 2021 to Aug 27, 2021. Additionally, experts familiar with these diabetes guidelines were  
60

invited to evaluate the contents of the questionnaire. Subsequently, the questionnaire was optimized based on feedback received during the pilot survey and expert consultation meeting.

### 2.3 Sample and administration

The sample size calculation was completed in accordance with the cross-sectional survey formula  $N = (Z_{\alpha}^2 * pq) / (d^2)$  [17]. According to a literature search, the estimated value of  $p$  is 26.2% (the projected rate of Chinese physicians being very familiar with the diabetes guidelines),  $q=1-p$ , and  $d=0.1*p$ . Assuming a 5% two-tailed type-I error ( $Z_{\alpha} = 1.96$ ) and a two-sided 95% confidence level, the estimated result of  $N$  was 1082. The investigation was performed from Sep 22, 2021 to Oct 29, 2021, a total of 1 162 participants completed the survey. The logical discrepancies or potential errors found in the questionnaires were resolved through telephone communication with the respondents.

### 2.4 Statistical analysis

Statistics analysis was performed using SAS Version 9.4. Continuous variables were presented as means with  $\pm$  SDs, and categorical variables as counts ( $n$ ) and percentages (%). Pearson's Chi-square test was used to compare categorical variables, and the Wilcoxon rank-sum test was used for non-parametric numerical variables. Moreover, the Cochran-Mantel-Haenszel (CMH) test was used for ordinal categorical variables. Differences in guidelines familiarity and awareness among different physician groups, including tertiary care hospital physicians (TCPs), secondary care hospital physicians (SCPs), and primary care practitioners (PCPs), were analyzed. In this study, the percentage differences among groups were reported, with statistically significant differences indicated by  $P$ -value  $< 0.05$ .

### 2.5 Patient and Public Involvement

Patients and/or the public were not involved in the design, or conduct, or reporting, or dissemination plans of our research.

## 3. RESULTS

### 3.1 Sample characteristics

1 A total of 1,162 questionnaires were collected. Among these, we finally included 1,150 questionnaires  
2 (99.0%) from physicians after excluding 12 questionnaires (7 from nurses, 2 from pharmacists, and 3 from  
3 medical teachers). Among the included questionnaires, 461 (40.1%) were obtained from TCPs, 307 (26.7%)  
4 were obtained from SCPs, and 382 (33.2%) were obtained from PCPs. There were significant differences  
5 among the three groups of physicians in terms of gender, educational level, professional category, years in  
6 practice, technical title, diabetes practice setting and number of patients with diabetes treated per week ( $P <$   
7 0.05). The full characteristics of the physicians are presented in Supplemental Appendix1.  
8  
9

### 10 3.2 Physicians' familiarity with diabetes guidelines

11 Physicians' familiarity with diabetes guidelines is demonstrated in Figure1. In the overall sample, the  
12 rankings of familiarity (including both very familiar and relatively familiar) with the four guidelines were as  
13 follows: *Guideline for the Prevention and Treatment of Type 2 Diabetes Mellitus in China* (75.8%), *National*  
14 *Guidelines for the Prevention and Control of Diabetes in Primary Care* (66.3%), *Guidelines for Prevention and*  
15 *Treatment of Diabetes in Chinese Medicine* (51.4%), and *Standards of Medical Care in Diabetes* (50.8%).  
16 TCPs exhibited a higher likelihood of familiarity with these four guidelines compared to other groups.  
17 Particularly, TCPs demonstrated the highest familiarity with the *Guideline for the Prevention and Treatment of*  
18 *Type 2 Diabetes Mellitus in China* (91.3%), followed by SCPs (83.4%), and PCPs (51.0%) ( $P < 0.001$ ).  
19 Similarly, TCPs exhibited a higher level of familiarity (76.8%) with the *National Guidelines for the Prevention*  
20 *and Control of Diabetes in Primary Care* compared to SCPs (69.4%) and PCPs (51.1%) ( $P < 0.001$ ). In terms  
21 of the *Guidelines for Prevention and Treatment of Diabetes in Chinese Medicine*, TCPs exhibited the highest  
22 level of familiarity (72.2%), followed by SCPs (52.8%), and PCPs (35.3%) ( $P < 0.001$ ). Lastly, various degrees  
23 of familiarities with the *Standards of Medical Care in Diabetes* were observed among TCPs (63.8%), SCPs  
24 (54.1%), and PCPs (22.3%) ( $P < 0.001$ ).  
25  
26  
27  
28  
29  
30  
31  
32  
33  
34  
35  
36  
37  
38  
39  
40  
41  
42  
43  
44  
45  
46  
47  
48  
49  
50  
51  
52  
53  
54  
55  
56  
57  
58

59 Insert "Figure1. Familiarity of physicians from different levels of hospitals with four diabetes guidelines (TCPs,  
60

tertiary care hospital physicians; SCPs, secondary care hospital physicians; PCPs, primary care practitioners)”

### 3.3 Physicians' self-reported reference status of diabetes guidelines

Physicians' self-reported reference status of diabetes guidelines summarized in Table 1. In terms of modern medicine guidelines, the rates of “frequent reference” were 80.9%, 77.2% and 60.7% for TCPs, SCPs and PCPs, respectively, indicating a stronger compliance in TCPs group ( $P < 0.001$ ). In comparison, the rates of “frequent reference” to TCM guidelines were 36.2% for TCPs, 36.5% for SCPs and 28.8% for PCPs, suggesting that the compliance to TCM guidelines was relatively low across all groups. No significant differences about the compliance to TCM guidelines were observed among these three physicians groups ( $P = 0.071$ ).

Table 1. Physicians' self-reported reference status of diabetes guidelines [n(%)]

| Categories                                 |                      | Overall<br>(n = 1150) | Physicians in different level hospitals              |                                                       |                                            | P-value |
|--------------------------------------------|----------------------|-----------------------|------------------------------------------------------|-------------------------------------------------------|--------------------------------------------|---------|
|                                            |                      |                       | Tertiary care<br>hospital<br>physicians<br>(n = 461) | Secondary care<br>hospital<br>physicians<br>(n = 307) | Primary care<br>practitioners<br>(n = 382) |         |
| Modern medicine<br>guidelines <sup>a</sup> | Frequent reference   | 842 (73.2)            | 373 (80.9)                                           | 237 (77.2)                                            | 232 (60.7)                                 | < 0.001 |
|                                            | Occasional reference | 236 (20.5)            | 75 (16.3)                                            | 59 (19.2)                                             | 102 (26.7)                                 |         |
|                                            | Infrequent reference | 53 (4.6)              | 9 (2.0)                                              | 8 (2.6)                                               | 36 (9.4)                                   |         |
|                                            | Rare reference       | 17 (1.5)              | 4 (0.9)                                              | 3 (1.0)                                               | 10 (2.6)                                   |         |
|                                            | No reference         | 2 (0.2)               | 0 (0.0)                                              | 0 (0.0)                                               | 2 (0.5)                                    |         |
| TCM guidelines <sup>b</sup>                | Frequent reference   | 389 (33.8)            | 167 (36.2)                                           | 112 (36.5)                                            | 110 (28.8)                                 | 0.071   |
|                                            | Occasional reference | 459 (39.9)            | 182 (39.5)                                           | 127 (41.4)                                            | 150 (39.3)                                 |         |
|                                            | Infrequent reference | 186 (16.2)            | 66 (14.3)                                            | 41 (13.4)                                             | 79 (20.7)                                  |         |
|                                            | Rare no reference    | 89 (7.7)              | 34 (7.4)                                             | 25 (8.1)                                              | 30 (7.9)                                   |         |
|                                            | No reference         | 27 (2.4)              | 12 (2.6)                                             | 2 (0.7)                                               | 13 (3.4)                                   |         |

a. Modern medicine guidelines including *Standards of Medical Care in Diabetes* issued by the American Diabetes Association, *Guideline for the Prevention and Treatment of Type 2 Diabetes Mellitus in China* and *National Guidelines for the Prevention and Control of Diabetes in Primary Care* issued by Chinese Diabetes Society. b. TCM guidelines including *Guidelines for Prevention and Treatment of Diabetes in Chinese Medicine* issued by China Association of Chinese Medicine.

### 3.4 Physicians' awareness and practice of contents from diabetes guidelines

The objective of this section is to assess physicians' awareness and practice of the recommendations outlined in the diabetes guidelines. These recommendations encompass various aspects, including dietary management, physical exercise, self-monitoring of blood glucose (SMBG), health education, hypoglycemia

knowledge, as well as treatment approaches based on TCM differentiation. Detailed information regarding specific recommendations can be found in supplemental appendix 2.

### (1) Management of diet and physical exercise

In terms of dietary management for patients with diabetes, the proportions of TCPs, SCPs and PCPs choosing "Hand over to a specialized nutritionist or comprehensive management team" were 39.5%, 25.7% and 22.8% respectively ( $P < 0.001$ ). In addition, the proportions of TCPs, SCPs and PCPs choosing "Personally evaluate the nutritional status of patients and provide detailed nutritional treatment suggestions and goals" were 61.4%, 61.6% and 44.0% respectively ( $P < 0.001$ ). It is noteworthy that PCPs had the highest proportions (54%) to choose "Due to the limited consultation time, patients are only given basic dietary advice" compared to TCPs (28.0%) and SCPs (24.4%) ( $P = 0.018$ ).

In terms of physical exercise management, the proportions of TCPs, SCPs and PCPs choosing "Hand over to a specialized health manager or professional manager team" were 29.3%, 21.2% and 20.2% respectively ( $P = 0.003$ ). Similarly, the proportions of TCPs, SCPs and PCPs choosing "Personally evaluate the health and athletic ability of patients, then provide detailed exercise recommendations" were 66.6%, 69.7% and 52.9% respectively ( $P < 0.001$ ). Furthermore, regarding the distribution of brochures, the preference ranked from highest to lowest as follows: SCPs (67.8%), PCPs (65.5%), and TCPs (56.0%) ( $P = 0.001$ ). Detailed results are illustrated in Table 2.

Table 2. Physicians' practice of dietary and exercise recommendations according to diabetes guidelines [n(%)]

| Categories            | Overall<br>(n = 1150)                                                                                                   | Physicians in different level hospitals              |                                                       |                                            | P-value    |         |
|-----------------------|-------------------------------------------------------------------------------------------------------------------------|------------------------------------------------------|-------------------------------------------------------|--------------------------------------------|------------|---------|
|                       |                                                                                                                         | Tertiary care<br>hospital<br>physicians<br>(n = 461) | Secondary care<br>hospital<br>physicians<br>(n = 307) | Primary care<br>practitioners<br>(n = 382) |            |         |
| Dietary<br>management | Hand over to a specialized nutritionist or comprehensive management team                                                | 348 (30.3)                                           | 182 (39.5)                                            | 79 (25.7)                                  | 87 (22.8)  | < 0.001 |
|                       | Personally evaluate the nutritional status of patients and provide detailed nutritional treatment suggestions and goals | 640 (55.7)                                           | 283 (61.4)                                            | 189 (61.6)                                 | 168 (44.0) | < 0.001 |
|                       | Advise patients to follow specific dietary patterns, for example, the                                                   | 626 (54.4)                                           | 263 (57.1)                                            | 163 (53.1)                                 | 200 (52.4) | 0.340   |

|    |            |                                    |            |            |            |                    |
|----|------------|------------------------------------|------------|------------|------------|--------------------|
| 1  |            | Mediterranean diet, a low-fat and  |            |            |            |                    |
| 2  |            | low-energy diet                    |            |            |            |                    |
| 3  |            | Distribute brochures               | 701 (61.0) | 265 (57.5) | 199 (64.8) | 237 (62.0) 0.108   |
| 4  |            | Provide dietary guidance based     |            |            |            |                    |
| 5  |            | on the TCM principle of food and   | 546 (47.5) | 208 (45.1) | 147 (47.9) | 191 (50.0) 0.364   |
| 6  |            | medicine sharing the same source   |            |            |            |                    |
| 7  |            | Due to the limited consultation    |            |            |            |                    |
| 8  |            | time, patients are only given      | 334 (29.0) | 129 (28.0) | 75 (24.4)  | 130 (54.0) 0.018   |
| 9  |            | basic dietary advice               |            |            |            |                    |
| 10 |            |                                    |            |            |            |                    |
| 11 |            | Hand over to a specialized health  |            |            |            |                    |
| 12 |            | manager or professional manager    | 277 (24.1) | 135 (29.3) | 65 (21.2)  | 77 (20.2) 0.003    |
| 13 |            | team                               |            |            |            |                    |
| 14 |            | Personally evaluate the health     |            |            |            |                    |
| 15 |            | and athletic ability of patients,  | 723 (62.9) | 307 (66.6) | 214 (69.7) | 202 (52.9) < 0.001 |
| 16 |            | then provide detailed exercise     |            |            |            |                    |
| 17 |            | recommendations                    |            |            |            |                    |
| 18 |            | For patients with frequent         |            |            |            |                    |
| 19 |            | hypoglycemia, increase physical    | 453 (39.4) | 161 (34.9) | 120 (39.1) | 172 (45.0) 0.011   |
| 20 |            | exercise and improve physical      |            |            |            |                    |
| 21 | Physical   | fitness                            |            |            |            |                    |
| 22 | exercise   | Distribute brochures               | 716 (62.3) | 258 (56.0) | 208 (67.8) | 250 (65.5) 0.001   |
| 23 | management | Guidance on TCM physical           |            |            |            |                    |
| 24 |            | exercises, such as Tai Chi and     | 539 (46.9) | 207 (44.9) | 152 (49.5) | 180 (47.1) 0.452   |
| 25 |            | Baduanjin                          |            |            |            |                    |
| 26 |            | Due to the limited consultation    |            |            |            |                    |
| 27 |            | time, patients are only advised to | 389 (33.8) | 158 (34.3) | 97 (31.6)  | 134 (35.1) 0.609   |
| 28 |            | exercise regularly                 |            |            |            |                    |
| 29 |            |                                    |            |            |            |                    |
| 30 |            |                                    |            |            |            |                    |
| 31 |            |                                    |            |            |            |                    |
| 32 |            |                                    |            |            |            |                    |
| 33 |            |                                    |            |            |            |                    |
| 34 |            |                                    |            |            |            |                    |

## (2) Instruction on self-monitoring of blood glucose and health education management

Physicians' instruction on self-monitoring of blood glucose and the availability of health management

team was also observed. These results revealed that TCPs (96.5%) exhibited the highest rate of SMBG instruction (including both comprehensive guidance and frequent guidance) compared to SCPs (94.5%) and PCPs (88.0%) ( $P < 0.001$ ). In terms of health education management, 75.7% of TCPs reported the presence of diabetes health management teams, followed by SCPs (57.0%) and PCPs (27.5%) ( $P < 0.001$ ). Detailed results are demonstrated in Figure2.

Insert "Figure2. Physicians' instruction on self-monitoring of blood glucose and the availability of health management team (TCPs, tertiary care hospital physicians; SCPs, secondary care hospital physicians; PCPs, primary care practitioners)"

### (3) Physicians' knowledge of hypoglycemia identification and TCM differentiation treatment

According to the guideline recommendations (supplemental appendix 2), the accurate characteristics of hypoglycemia include options a, b, c and d, as defined in Table 3. In our exploratory analysis, the percentages of TCPs, SCPs, and PCPs choosing “a, b, c and d” were 63.6%, 65.2% and 49.5% respectively. Notably, the accuracy rate of TCPs was higher compared to SCPs and PCPs ( $P < 0.001$ ). These results indicate that approximately 40% of physicians may have insufficient understanding of the guideline recommendations on hypoglycemia. Similarly, the guidelines recommend specific prescriptions for diabetes based on TCM syndrome differentiation (supplemental appendix 2). For diabetes with Qi-Yin deficiency syndrome, prescriptions including options a, b and c in Table 3 are indicated. The accuracy rates of TCPs, SCPs, and PCPs were 86.1%, 86.3% and 83.5% respectively, showing no significant differences among these three groups of physicians ( $P = 0.477$ ). When considering diabetic neuropathy with Qi-deficiency and collateral-obstruction syndrome, interventions or prescriptions based on this syndrome differentiation involve the options a, b and c as outlined in Table 3 based on the guidelines. The accuracy rate was higher for TCPs (68.6%) than for SCPs (65.8%) and PCPs (55.0%) ( $P < 0.001$ ).

Table 3. Physicians' knowledge of hypoglycemia identification and TCM differentiation treatment [n(%)]

| Categories                                                                                                                                         | Overall<br>(n = 1150) | Physicians in different level hospitals              |                                                       |                                            | P-value |
|----------------------------------------------------------------------------------------------------------------------------------------------------|-----------------------|------------------------------------------------------|-------------------------------------------------------|--------------------------------------------|---------|
|                                                                                                                                                    |                       | Tertiary care<br>hospital<br>physicians<br>(n = 461) | Secondary care<br>hospital<br>physicians<br>(n = 307) | Primary care<br>practitioners<br>(n = 382) |         |
| The characteristics of hypoglycemia including:                                                                                                     |                       |                                                      |                                                       |                                            |         |
| a. Blood glucose < 3.9 mmol/l                                                                                                                      | 1045 (90.9)           | 409 (88.7)                                           | 282 (91.9)                                            | 354 (92.7)                                 | 0.110   |
| b. Hypoglycemia without a specific blood glucose limit, accompanied by serious events involving changes in consciousness and/or physical condition | 788 (68.5)            | 336 (72.9)                                           | 223 (72.6)                                            | 229 (60.0)                                 | < 0.001 |
| c. Symptoms of sympathetic excitement such as palpitations, anxiety, sweating, dizziness, hand tremors, and feelings of hunger                     | 1124 (97.7)           | 453 (98.3)                                           | 304 (99.0)                                            | 367 (96.1)                                 | 0.022   |
| d. Central nervous system symptoms such as changes in mental status, cognitive impairment,                                                         | 1013 (88.1)           | 424 (92.0)                                           | 289 (94.1)                                            | 300 (78.5)                                 | < 0.001 |



|                                                     |            |            |            |            |         |
|-----------------------------------------------------|------------|------------|------------|------------|---------|
| convulsions, and coma                               |            |            |            |            |         |
| 1 Accuracy rate (All above option)                  | 682 (59.3) | 293 (63.6) | 200 (65.2) | 189 (49.5) | < 0.001 |
| 2 Prescriptions for diabetes with Qi-Yin deficiency |            |            |            |            |         |
| 3 syndrome                                          |            |            |            |            |         |
| 4                                                   |            |            |            |            |         |
| 5 a. Shenqi Jiangtang granule                       | 931 (81.0) | 370 (80.3) | 256 (83.4) | 305 (79.8) | 0.443   |
| 6 b. Jinlida granule                                | 507 (44.1) | 221 (47.9) | 157 (51.1) | 129 (33.8) | < 0.001 |
| 7 c. Shengmai Powder                                | 616 (53.6) | 270 (58.6) | 150 (48.9) | 196 (51.3) | 0.017   |
| 8 d. Gegen Qinlian decoction                        | 143 (12.4) | 51 (11.1)  | 37 (12.1)  | 55 (14.4)  | 0.335   |
| 9 e. Dachaihu decoction                             | 63 (5.5)   | 27 (5.9)   | 16 (5.2)   | 20 (5.2)   | 0.899   |
| 10 Accuracy rate (choosing “a, b or c” without “d   | 981 (85.3) | 397 (86.1) | 265 (86.3) | 319 (83.5) | 0.477   |
| 11 or e”)                                           |            |            |            |            |         |
| 12                                                  |            |            |            |            |         |
| 13 Prescriptions or interventions for diabetic      |            |            |            |            |         |
| 14 neuropathy with Qi-deficiency and                |            |            |            |            |         |
| 15 collateral-obstruction syndrome                  |            |            |            |            |         |
| 16                                                  |            |            |            |            |         |
| 17                                                  |            |            |            |            |         |
| 18 a. Mudan granule                                 | 608 (52.9) | 281 (61.0) | 170 (55.4) | 157 (41.1) | < 0.001 |
| 19 b. Acupuncture                                   | 510 (44.4) | 216 (46.9) | 134 (43.7) | 160 (41.9) | 0.337   |
| 20 c. TCM fumigation                                | 650 (56.5) | 282 (61.2) | 179 (58.3) | 189 (49.5) | 0.002   |
| 21 d. Qiming granule                                | 422 (36.7) | 145 (31.5) | 105 (34.2) | 172 (45.0) | < 0.001 |
| 22 Accuracy rate (choosing “a, b or c” without      | 728 (63.3) | 316 (68.6) | 202 (65.8) | 210 (55.0) | < 0.001 |
| 23 “d”)                                             |            |            |            |            |         |
| 24                                                  |            |            |            |            |         |
| 25                                                  |            |            |            |            |         |

### 3.5 Facilitating factors and barriers to implementation of diabetes guidelines

Standardizing clinical practices, guiding patients' self-care, and the presence of high-level evidence were consistently considered as the top three facilitating factors for adherence to diabetes guidelines across the majority of physicians (see supplemental appendix 3). The majority of physicians, regardless of their level of hospital, concur on the pivotal role of guidelines in standardizing their clinical practices and improving medical quality, with no significant differences observed among the three groups (TCPs = 96.1%; SCPs = 97.1%; PCPs = 94.0%;  $P = 0.118$ ). Importantly, approximately 80% of physicians in all the groups acknowledged the potential of diabetes guidelines in guiding patients' nursing practices. Notably, a statistical difference was observed among physicians from different levels of hospitals regarding their preference for “Guidelines with a high-level of evidence can be convincing” (TCPs = 71.8%; SCPs = 67.4%; PCPs = 46.1%;  $P < 0.001$ ). This finding suggests that TCPs exhibit a stronger inclination towards evidence-based recommendations compared to SCPs and PCPs.

In terms of barriers to the implementation of diabetes guidelines, the majority of physicians from different-level hospitals chose “Limited availability and accessibility of TCM diabetes guidelines” as a major



1 obstacle (TCPs = 68.8%; SCPs = 68.7%; PCPs = 61.5%;  $P = 0.050$ ), with no significant difference observed  
2 among the three groups. Additionally, “Time-consuming communication with patients” was identified as the  
3 second most prevalent barrier to the implementation of diabetes guidelines, with the selection rates ranking  
4 highest to lowest as follows: PCPs (65.5%), SCPs (59.9%) and TCPs (52.5%) ( $P = 0.001$ ). Lastly, in line with  
5 the pattern displayed by the facilitating factors, physicians from different levels of hospitals showed a  
6 statistically significant difference in selecting “The guideline recommendation lacks a convincing basis” (TCPs  
7 = 29.3%; SCPs = 22.8%; PCPs = 18.6%;  $P = 0.001$ ).

#### 18 4. DISCUSSION

21 This national survey of 1150 physicians aimed to investigate their familiarity and awareness of four  
22 different diabetes guidelines. Two main findings were revealed from this nationwide survey. First of all, the  
23 level of familiarity and self-reported reference status with the diabetes guidelines varied among clinicians in  
24 hospitals at different levels. Secondly, a significant discrepancy was observed between physicians’ awareness  
25 of modern medicine guidelines and TCM guidelines. Overall, TCPs exhibited the highest awareness of the  
26 diabetes guidelines, followed by SCPs and PCPs. These findings are in line with several previous studies that  
27 have reported relatively poor attitudes and adherence to guidelines among general practitioners and PCPs  
28 compared to other medical doctors [18,19]. These differences may be attributed to the additional training in  
29 diabetes management received by physicians in tertiary hospital compared to PCPs [20].

31 Additionally, the results indicated that rate of physicians’ self-reported reference for modern medical  
32 guidelines was approximately twice of that for TCM guidelines. This discrepancy may be attributed to several  
33 factors. Firstly, modern medical guidelines, such as *Guideline for the Prevention and Treatment of Type 2*  
34 *Diabetes Mellitus in China* issued by the CDS, are based on a larger body of high level evidence from modern  
35 medicine, making them crucial for guiding clinical practice in China [21]. In contrast, the establishment of  
36 TCM guidelines is relatively recent with limited availability of high-level evidence. Moreover, the complex  
37 nature of TCM syndrome differentiation and TCM physicians’ heavy reliance on clinical experience may

1 further worsen the discrepancy [22, 23]. Therefore, it is necessary to provide training and guidance on health  
2 management for diabetes to physicians, especially PCPs. Future studies should focus on further exploration and  
3 in-depth research of TCM diabetes guidelines.  
4  
5  
6

7  
8       Regarding physicians' knowledge of specific recommendations from diabetes guidelines, our study  
9 revealed that the majority of physicians instruct patients to conduct SMBG. However, recent national data  
10 indicate that there has been no significant improvement in the awareness, treatment, and control rates of  
11 diabetes over the past decade [5,6]. In addition, our study also revealed unsatisfactory management of diet,  
12 physical exercise, and health education. In terms of diet and physical exercise management, less than one-third  
13 of physicians choose to refer to specialized professional management teams. Furthermore, due to time  
14 constraints, more than half of PCPs provide only basic dietary advice to patients such as "paying attention to  
15 diet". However, the guidelines strongly recommend that "Patients with T2DM or pre-diabetes need to receive  
16 individualized medical nutrition guidance, which should be conducted under the guidance of nutritionists  
17 (physicians) or comprehensive management teams familiar with the nutritional treatment for diabetes" [14].  
18  
19 The results also indicated that PCPs reported a lower rate of assistance by health management team, which is  
20 consistent with their lower self-reported rate of choosing to "Hand over to a special professional manager  
21 team". Lastly, our results suggested that some physicians may not have mastered the content of the guidelines  
22 well enough, as evidenced by approximately 40% of physicians providing inaccurate or omitted judgement  
23 about the characteristics of hypoglycemia. These data suggest a significant disparity between clinical practice  
24 and guidelines, which is consistent with previous studies [24]. Therefore, it is necessary to provide physicians  
25 with more specific training and guidance on diabetes health management, and it is imperative to further  
26 enhance the allocation of diabetes-related professional personnel and teams in primary medical institutions.  
27  
28  
29  
30  
31  
32  
33  
34  
35  
36  
37  
38  
39  
40  
41  
42  
43  
44  
45  
46  
47  
48  
49  
50  
51  
52  
53

54       Similar to findings from other studies, our study also identified several facilitating factors and barriers to  
55 the implementation of diabetes guidelines [25,26]. Regarding the facilitating factors for the implementation of  
56 diabetes guidelines, most physicians believed that guidelines can standardize clinical practice, improve medical  
57  
58  
59  
60

1 quality, and guide patients in self-care. This indicates that the significance of guidelines is recognized by the  
2 majority of physicians [27]. Although our study provides important insights into facilitating factors in the  
3 implementation of guidelines, some barriers to guideline implementation must be considered. Our results  
4 indicate that limited availability and accessibility of TCM diabetes guidelines are major barriers. Indeed,  
5 previous studies have shown that TCM guidelines have been established relatively recently, indicating that  
6 further investigation focusing on the TCM diabetes guidelines should be required [20]. Meanwhile, it is  
7 essential to publish these guidelines on multiple platforms, including freely accessible ones, so that all  
8 physicians can download and study them. In addition, consistent with previous studies, PCPs demonstrated less  
9 awareness about the latest evidence, in contrast to TCPs. Research conducted by B Carlsen highlighted that  
10 general practitioners are often confused about the evidence base of extensive guidelines relevant to their  
11 practice and they experience more practical constraints on guideline implementation [26]. Therefore, while it is  
12 crucial to prioritize high-level evidence to improve reliability of these guidelines, equal emphasis should also be  
13 placed on training of primary care practitioners.

### 34 **Strengths and limitations**

36 This study has several strengths. Firstly, this questionnaire survey was nationally representative and  
37 provided reliable data on the physicians' familiarity and awareness of both Chinese and international diabetes  
38 guidelines. Our analysis sample included physicians from different medical institutions across 192 cities in 30  
39 provinces of China, which is highly representative. Secondly, we conducted a stratified analysis approach to  
40 obtain more specific and comprehensive results, including the stratification of physicians in different medical  
41 institutions. Thirdly, apart from the self-reported familiarity and reference questionnaire items, we also  
42 designed a wide range of specific questions concerning multiple key recommendations within the current  
43 guidelines, which will allow us to evaluate the physicians' awareness to contents in the guidelines effectively.  
44 Thus, our findings could provide the latest evidence for future studies focusing on diabetes guidelines in China.

45 Our study also has certain limitations. Firstly, although the sample is representative of Chinese medical

1 physicians and a substantial number of physicians (>1000), the findings cannot be automatically applied to  
2  
3 other countries. Secondly, we have not examined variations regarding awareness of physicians, self-reported  
4  
5 reference status of physicians, and barriers to treatment among different age, gender, education, or number of  
6  
7 patients with diabetes received by the physician. Future studies focusing on the influencing factors of  
8  
9 physicians' compliance with diabetes guidelines will be conducted. Lastly, although we have included  
10  
11 multiple-choice questions to investigate more information, the survey questionnaire has not been generalizable  
12  
13 to test all specific aspects related to the physicians' awareness of the diabetes guidelines.  
14  
15  
16  
17

## 18 5. CONCLUSION

21 In conclusion, the level of familiarity and awareness of these four evaluated guidelines varies among  
22  
23 physicians in different-level hospitals. Overall, TCPs generally exhibited the highest familiarity and awareness  
24  
25 of diabetes guidelines. In contrast, the familiarity and awareness of all four guidelines among PCPs are  
26  
27 relatively poor, indicating a necessity of improvement. In addition, there is a significant discrepancy between  
28  
29 modern medicine guidelines and TCM guidelines, highlighting the necessity for further studies focusing on  
30  
31 TCM diabetes guidelines. Moreover, it's crucial to provide consistent education and training for physicians, in  
32  
33 particular, PCPs.  
34  
35  
36  
37  
38

39 **Acknowledgement** This work was carried out by the Specialist Committee for Primary Diabetes Care of China  
40  
41 Association of Chinese Medicine, majority of physicians as members of the Specialist Committee for Primary  
42  
43 Diabetes Care have participated in the survey questionnaire. We would like to express our gratitude to all the  
44  
45 participating physicians.  
46  
47  
48

49 **Contributors** Li-yan Jia, Shu-yu Yang designed the research and took full responsibility for the work as a  
50  
51 whole. Li-yan Jia designed the survey questionnaire, Neng-jiang Zhao, Shun-qin Wang, Bing Yan, Jian-ping  
52  
53 Liu were all involved in critically revising the questionnaire and provided valuable advice for designing the  
54  
55 study. Neng-jiang Zhao, Zhi-hai Zhang, Le Li, Na Zhan, Yuan-bing Lin, Miao-na Cai, participated in  
56  
57 questionnaire distribution and collection. Na Zhan, Yuan-bing Lin participated in questionnaire data checking.  
58  
59  
60

1 Li-yan Jia analyzed and interpreted the data, and wrote the paper. Cao-xin Huang, Bao-yong Lai, Jian-ping Liu,  
2  
3 Shu-yu Yang contributed to critically revising the manuscript.  
4

5 **Funding** This study was supported by the fund from the State Administration of Traditional Chinese Medicine  
6  
7 primary care service project in 2021 “Formulating the guideline for diabetes prevention and treatment in  
8  
9 primary care” (No. (2021) 141) and the Fujian Traditional Chinese Medicine Research Project “Investigation  
10  
11 on the Current Situation of the Development of Traditional Chinese Medicine in Xiamen Third level General  
12  
13 Hospital” (No.2021zyg178). Shuyu Yang was partially supported by the National Famous Traditional Chinese  
14  
15 Medicine Expert Inheritance Studio Construction Project (No. (2022) 75).  
16  
17  
18  
19

### 20 21 **Conflict of interest**

22  
23 All authors declare that they have no conflicts of interest.  
24  
25

26 **Patient and Public Involvement** Patients and/or the public were not involved in the design, or conduct, or  
27  
28 reporting, or dissemination plans of our research.  
29  
30

31 **Ethics approval** This study involves human participants and has obtained ethical approval from the Medical  
32  
33 Ethics Committee of the First Affiliated Hospital of Xiamen University (No. XMY Y-2021KY027-02).  
34  
35 Participants gave informed consent to participate in the study before taking part.  
36  
37  
38

### 39 **Abbreviations**

40  
41 ADA American Diabetes Association  
42  
43

44 CACM China Association of Chinese Medicine  
45  
46

47 CDS Chinese Diabetes Society  
48  
49

50 CPGs Clinical practice guidelines  
51  
52

53 IDF International Diabetes Federation  
54  
55

56 PCPs Primary care practitioners  
57  
58

59 SCPs Secondary care hospital physicians  
60

SMBG Self-monitoring of blood glucose

1 T2DM Type 2 diabetes mellitus

2  
3 TCM Traditional Chinese medicine

4  
5 TCPs Tertiary care hospital physicians

6  
7  
8 **Data availability statement** Data are available upon reasonable request.

9  
10  
11 **Reference**

12  
13 [1] GBD 2016 Disease and Injury Incidence and Prevalence Collaborators. Global, regional, and national  
14 incidence, prevalence, and years lived with disability for 328 diseases and injuries for 195 countries,  
15 1990-2016: a systematic analysis for the Global Burden of Disease Study 2016. *Lancet* 2017;390(10100):  
16 1211-1259.

17  
18  
19 [2] Qian W, Xu Z, Li F, et al. Prevalence, awareness, treatment and control of diabetes mellitus among  
20 middle-aged and elderly people in a rural Chinese population: A cross-sectional study. *PLoS One* 2018;13  
21 (6):e0198343.

22  
23  
24 [3] Sun H, Saeedi PY, Karuranga S, et al. IDF Diabetes Atlas: Global, regional and country-level diabetes  
25 prevalence estimates for 2021 and projections for 2045. *Diabetes Res Clin Pract* 2022;183:109119.

26  
27  
28 [4] Hao L, Guoying C, Yihong J, et al. System Dynamic Model Simulates the Growth Trend of Diabetes  
29 Mellitus in Chinese Population: Implications for Future Urban Public Health Governance. *Int J Public Health*  
30 2022;67:1605064.

31  
32  
33 [5] Limin W, Wen P, Zhenping Z, et al. Prevalence and Treatment of Diabetes in China, 2013-2018. *JAMA*  
34 2021;326(24):2498-2506.

35  
36  
37 [6] The Specialist Committee for Primary Diabetes Care, China Association of Chinese Medicine. National  
38 Chinese medicine guideline for the prevention and treatment of diabetes in primary care (2022). *Chin J*  
39 *Diabetes Mellitus* 2023;15(2):100-117.

40  
41  
42 [7] Bashar Q, April G, Amira Q, et al. Barriers to Clinical Practice Guideline Implementation Among  
43 Physicians: A Physician Survey. *Int J Gen Med.* 2021;14:7591-7598.

- 1 [8] Lori M, Allison H L, Emelia J B, et al. National study of physician awareness and adherence to  
2 cardiovascular disease prevention guidelines. *Circulation* 2005;111(4):499-510.
- 3  
4  
5 [9] Michelle M C, Lara J A, Paivi M S, et al. Use of national asthma guidelines by allergists and  
6  
7  
8 pulmonologists: a national survey. *J Allergy Clin Immunol Pract* 2020;8(9):3011-3020.e2.  
9
- 10  
11 [10] Sperati C J, Soman S, Agrawal V, et al. Primary care physicians' perceptions of barriers and facilitators to  
12  
13 management of chronic kidney disease: A mixed methods study. *PLoS One* 2019;14(8):e0221325.  
14  
15  
16 [11] Mia B, Frances R, Gaston A, et al. Clinicians' attitudes and perceived barriers and facilitators to cancer  
17  
18 treatment clinical practice guideline adherence: a systematic review of qualitative and quantitative literature.  
19  
20  
21 *Implement Sci* 2020;15(1):39.  
22
- 23  
24 [12] Indah S W, Yolanda van der G, Pradana S, et al. Awareness, agreement, adoption and adherence to type 2  
25  
26 diabetes mellitus guidelines: a survey of Indonesian primary care physicians. *BMC Fam Pract* 2014;15:72.  
27  
28  
29 [13] American Diabetes Association. Standards of Medical Care in Diabetes-2022. *Diabetes Care*  
30  
31 2022;45(Suppl 1):1-270.  
32
- 33  
34 [14] Chinese Diabetes Society. Guideline for the prevention and treatment of type 2 diabetes mellitus in China  
35  
36 (2020 edition). *Chin J Diabetes Mellitus* 2021;13(04): 315-409.  
37  
38  
39 [15] Chinese Diabetes Society, National Office for Primary Diabetes Care. National guidelines for the  
40  
41 prevention and control of diabetes in primary care (2022). *Chin J Intern Med* 2022; 61(03):249-262.  
42  
43  
44 [16] Xiaolin T, Ximing L, Junping W, et al. Guidelines for prevention and treatment of diabetes in Chinese  
45  
46 Medicine. *Chinese Medicine Modern Distance Education of China* 2011;9(04):148-151.  
47  
48  
49 [17] Huang Q, Xu X, Shou J, et al. Study on related factors of low control rate of general practitioner in type 2  
50  
51 diabetes mellitus. *Journal of Nantong University (Medical Sciences)* 2017;37(6):514-516.  
52  
53  
54 [18] Carlsen B, Bringedal B. Attitudes to clinical guidelines--do GPs differ from other medical doctors?[J].  
55  
56 *BMJ Qual Saf.* 2011;20(2):158-62.  
57  
58  
59 [19] Spiegel B M R , Farid M, van Oijen M G H, et al. Adherence to best practice guidelines in dyspepsia: a  
60



1 survey comparing dyspepsia experts, community gastroenterologists and primary-care providers[J]. *Aliment*

2  
3 *Pharmacol Ther.* 2009;29(8):871-81.

4  
5 [20] Batais MA, Almigbal TH, Bin Abdulhak AA, et al. Assessment of physicians' awareness and knowledge  
6  
7 of familial hypercholesterolemia in Saudi Arabia: Is there a gap? *PLoS One* 2017;12(8):e0183494.

8  
9  
10 [21] Ji L, Newman J, Lu J, et al. Understanding the standard of care in the treatment of type 2 diabetes in  
11  
12 China: results from a national survey. *Chin Med J (Engl)* 2014;127(20):3524-3529.

13  
14 [22] Jiao Y, Liu J, Jiang L, et al. Guidelines on common cold for traditional Chinese medicine based on pattern  
15  
16 differentiation. *J Tradit Chin Med* 2013;33(4):417-422.

17  
18 [23] Dou Z, Xia Y, Zhang J, et al. Syndrome Differentiation and Treatment Regularity in Traditional Chinese  
19  
20 Medicine for Type 2 Diabetes: A Text Mining Analysis. *Front Endocrinol (Lausanne)* 2021;12:728032.

21  
22 [24] Fürthauer J, Flamm M, Sönnichsen A. Patient and physician related factors of adherence to evidence based  
23  
24 guidelines in diabetes mellitus type 2, cardiovascular disease and prevention: a cross sectional study. *BMC Fam*  
25  
26 *Pract* 2013;14:47.

27  
28 [25] Baha A, Kokturk N. Physician's attitude against COPD guidelines and the choice of first-line treatment for  
29  
30 COPD[J]. *Respir Med.* 2021;176:106273.

31  
32 [26] Jamé S, Wittenberg E, Potter MB, et al. The new lipid guidelines: what do primary care clinicians  
33  
34 think?[J]. *Am J Med.* 2015;128(8):914.e5-914.e10.

35  
36 [27] Lang JK, Paykel MS, Haines KJ, et al. Clinical practice guidelines for early mobilization in the ICU: a  
37  
38 systematic review. *Crit Care Med* 2020;48(11):e1121-e1128.

### 39 **Figure legends**

40  
41 Figure 1. Familiarity of physicians from different levels of hospitals with four diabetes guidelines (TCPs,  
42  
43 tertiary care hospital physicians; SCPs, secondary care hospital physicians; PCPs, primary care practitioners).

44  
45 Figure 2. Physicians' instruction on self-monitoring of blood glucose and the availability of health management  
46  
47 team (TCPs, tertiary care hospital physicians; SCPs, secondary care hospital physicians; PCPs, primary care  
48  
49



1 practitioners)

2  
3 **Supporting information**

4  
5 Appendix1. Physicians demographic and profession characteristics

6  
7  
8 Appendix2. Recommendations excerpted from the diabetes guidelines

9  
10 Appendix3. Facilitating factors and barriers to diabetes guideline implementation

11  
12  
13  
14  
15  
16  
17  
18  
19  
20  
21  
22  
23  
24  
25  
26  
27  
28  
29  
30  
31  
32  
33  
34  
35  
36  
37  
38  
39  
40  
41  
42  
43  
44  
45  
46  
47  
48  
49  
50  
51  
52  
53  
54  
55  
56  
57  
58  
59  
60

For peer review only

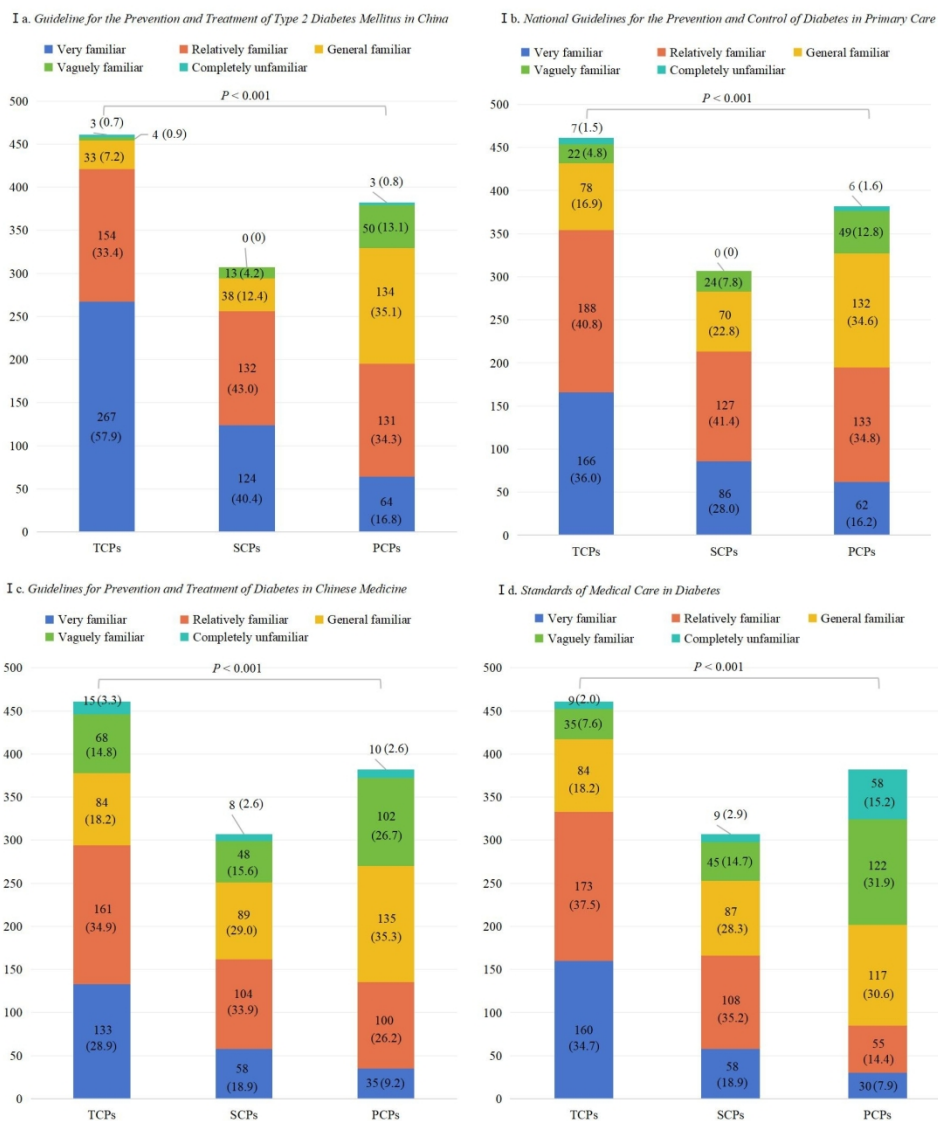

Figure 1. Familiarity of physicians from different levels of hospitals with four diabetes guidelines (TCPs, tertiary care hospital physicians; SCPs, secondary care hospital physicians; PCPs, primary care practitioners)

399x456mm (120 x 120 DPI)

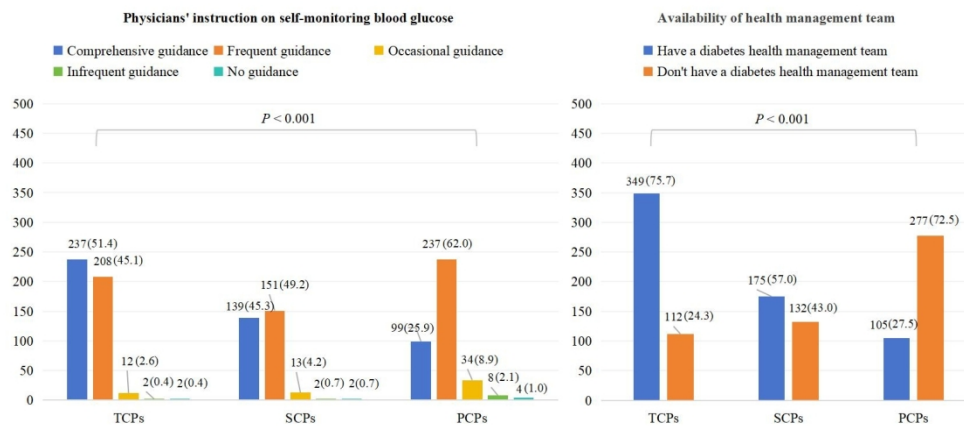

Figure 2. Physicians' instruction on self-monitoring of blood glucose and the availability of health management team (TCPs, tertiary care hospital physicians; SCPs, secondary care hospital physicians; PCPs, primary care practitioners)

365x160mm (120 x 120 DPI)

Appendix 1. Physicians demographic and profession characteristics [n(%)]

| Variable                                                     | Physicians in different level hospitals     |                                              |                                      | <i>P</i> -value |
|--------------------------------------------------------------|---------------------------------------------|----------------------------------------------|--------------------------------------|-----------------|
|                                                              | Tertiary care hospital physicians (n = 461) | Secondary care hospital physicians (n = 307) | Primary care practitioners (n = 382) |                 |
| Age (mean years $\pm$ s.d.)                                  | 40.82 $\pm$ 9.21                            | 40.42 $\pm$ 8.78                             | 41.27 $\pm$ 8.13                     | 0.215           |
| Male gender                                                  | 189 (41.00)                                 | 158 (51.47)                                  | 209 (54.71)                          | < 0.001         |
| Education level                                              |                                             |                                              |                                      | < 0.001         |
| Technical secondary and below                                | 0 (0)                                       | 1 (0.33)                                     | 35 (9.16)                            |                 |
| College degree                                               | 7 (1.52)                                    | 17 (5.54)                                    | 107 (28.01)                          |                 |
| Bachelor degree                                              | 169 (36.66)                                 | 231 (75.24)                                  | 213 (55.76)                          |                 |
| Master degree                                                | 222 (48.16)                                 | 58 (18.89)                                   | 26 (6.81)                            |                 |
| Doctoral degree                                              | 63 (13.67)                                  | 0 (0)                                        | 1 (0.26)                             |                 |
| Professional category                                        |                                             |                                              |                                      | < 0.001         |
| TCM                                                          | 135 (29.28)                                 | 76 (24.76)                                   | 88 (23.04)                           |                 |
| Integrated traditional Chinese medicine and western medicine | 137 (29.72)                                 | 89 (28.99)                                   | 81 (21.20)                           |                 |
| Modern clinical medicine                                     | 188 (40.78)                                 | 140 (45.60)                                  | 200 (52.36)                          |                 |
| Other categories                                             | 1 (0.22)                                    | 2 (0.65)                                     | 13 (3.40)                            |                 |
| Years in practice (mean years $\pm$ s.d.)                    | 15.50 $\pm$ 9.82                            | 15.12 $\pm$ 9.00                             | 17.30 $\pm$ 9.05                     | 0.001           |
| Technical title                                              |                                             |                                              |                                      | < 0.001         |
| Junior (Resident physicians)                                 | 71 (15.40)                                  | 53 (17.26)                                   | 170 (44.50)                          |                 |
| Intermediate (Attending physicians)                          | 131 (28.42)                                 | 121 (39.41)                                  | 137 (35.86)                          |                 |
| Sub-senior (Associate chief physicians)                      | 138 (29.93)                                 | 92 (29.97)                                   | 67 (17.54)                           |                 |
| Senior (Chief physicians)                                    | 121 (26.25)                                 | 41 (13.36)                                   | 8 (2.09)                             |                 |
| Diabetes practice setting                                    |                                             |                                              |                                      | < 0.001         |
| Department of endocrinology and diabetes                     | 327 (70.93)                                 | 171 (55.70)                                  | 11 (2.88)                            |                 |
| Department of general practice                               | 14 (3.04)                                   | 13 (4.23)                                    | 212 (55.50)                          |                 |
| Other departments                                            | 120 (26.03)                                 | 123 (40.07)                                  | 159 (41.63)                          |                 |
| Number of patients with diabetes (per week)                  |                                             |                                              |                                      | < 0.001         |
| None                                                         | 4 (0.87)                                    | 2 (0.65)                                     | 9 (2.36)                             |                 |
| 1 ~ 10                                                       | 99 (21.48)                                  | 75 (24.43)                                   | 163 (42.67)                          |                 |
| 11 ~ 50                                                      | 133 (28.85)                                 | 120 (39.09)                                  | 150 (39.27)                          |                 |
| 51 ~ 100                                                     | 115 (24.95)                                 | 60 (19.54)                                   | 44 (11.52)                           |                 |
| 101 ~ 300                                                    | 98 (21.26)                                  | 36 (11.73)                                   | 15 (3.93)                            |                 |
| $\geq$ 301                                                   | 12 (2.6)                                    | 14 (4.56)                                    | 1 (0.26)                             |                 |



- 1  
2  
3  
4 need to be regularly monitored.  
5  
6 ①Physical exercise therapy should be conducted  
7 Recommendation  
8 under the guidance of relevant professionals.  
9  
10 ②Prior to exercise, necessary health and  
11  
12 physical ability assessments should be conducted  
13 Recommendation  
14 3. Physical exercise to ensure the safety and effectiveness of the  
15 management exercise therapy.  
16  
17 ③Physical exercise should be avoided in cases  
18  
19 of severe hypoglycemia, and can be gradually  
20 Recommendation  
21 resumed once the condition is under control and  
22  
23 stabilized.  
24  
25 ①Classification of hypoglycemia:  
26  
27 Grade 1 hypoglycemia: Blood glucose levels are  
28  
29 between 3.0 mmol/l and 3.9 mmol/l; Grade 2  
30  
31 hypoglycemia: Blood glucose levels are less than  
32  
33 3.0 mmol/l; Grade 3 hypoglycemia: Recommendation  
34  
35 Hypoglycemia without a specific blood glucose  
36  
37 limit, accompanied by severe alterations in  
38  
39 consciousness and / or physical changes,  
40  
41 4. Hypoglycemia requiring assistance from others.  
42  
43 ②The clinical symptoms of hypoglycemia are  
44  
45 related to the level and rate of decline of blood  
46  
47 glucose. They can manifest as symptoms of  
48  
49 sympathetic activation (such as palpitations,  
50 Recommendation  
51 anxiety, sweating, dizziness, trembling hands,  
52  
53 and feelings of hunger) and central nervous  
54  
55 symptoms (such as changes in mental status,  
56  
57 cognitive impairment, convulsions, and coma).  
58  
59 5. Diabetes with Qi-Yin ①For the treatment of Qi-Yin deficiency Recommendation  
60

|                                                                               |                                                                                                                                                                                                                                                |                |
|-------------------------------------------------------------------------------|------------------------------------------------------------------------------------------------------------------------------------------------------------------------------------------------------------------------------------------------|----------------|
| deficiency syndrome                                                           | syndrome in type 2 diabetes, Jinlida granules and Shenqi Jiangtang granules can be used in combination with routine treatment.                                                                                                                 |                |
|                                                                               | ②Shengmai Powder, with appropriate adjustments to dosage, can be used to alleviate the symptoms of fatigue and Qi-Yin deficiency syndrome in patients with diabetes.                                                                           | Recommendation |
|                                                                               | ③For the early and middle stages of type 2 diabetes, Gegen Qinlian decoction can be administered orally for intestinal-damp-heat syndrome, and Dachaihu Decoction can be administered orally for stagnated-heat in liver and stomach syndrome. | Recommendation |
| 6. Diabetic neuropathy with Qi-deficiency and collateral-obstruction syndrome | ①For diabetic neuropathy patients with Qi-deficiency and collateral-obstruction syndrome, Mudan granule can be administered orally, and can be combined with acupuncture and fumigation treatment to improve symptoms.                         | Recommendation |

---

## Appendix 3. Facilitating factors and barriers to diabetes guideline implementation [n(%)]

| Categories                                                                               | Overall<br>(n = 1150) | Physicians in different level hospitals              |                                                       |                                            | <i>P</i> -value |
|------------------------------------------------------------------------------------------|-----------------------|------------------------------------------------------|-------------------------------------------------------|--------------------------------------------|-----------------|
|                                                                                          |                       | Tertiary care<br>hospital<br>physicians<br>(n = 461) | Secondary care<br>hospital<br>physicians<br>(n = 307) | Primary care<br>practitioners<br>(n = 382) |                 |
| Facilitating factors                                                                     |                       |                                                      |                                                       |                                            |                 |
| The guideline can standardize clinical practices and improve the quality of medical care | 1100 (95.65)          | 443 (96.10)                                          | 298 (97.07)                                           | 359 (93.98)                                | 0.118           |
| Guide patients in self-care and nursing                                                  | 907 (78.87)           | 359 (77.87)                                          | 247 (80.46)                                           | 301 (78.80)                                | 0.691           |
| Guidelines with a high level of evidence can be highly convincing                        | 714 (62.09)           | 331 (71.80)*                                         | 207 (67.43)*                                          | 176 (46.07)*                               | < 0.001         |
| The format of the guidelines is standardized and easy to navigate                        | 657 (57.13)           | 273 (59.22)*                                         | 190 (61.89)*                                          | 194 (50.79)*                               | 0.007           |
| The guideline can facilitate communication with patients                                 | 686 (59.65)           | 260 (56.40)*                                         | 201 (65.47)*                                          | 225 (58.90)*                               | 0.040           |
| Reduce medical costs                                                                     | 627 (54.52)           | 266 (57.70)                                          | 169 (55.05)                                           | 192 (50.26)                                | 0.095           |
| Barriers                                                                                 |                       |                                                      |                                                       |                                            |                 |
| Restricted the autonomy of doctors                                                       | 376 (32.70)           | 155 (33.62)                                          | 96 (31.27)                                            | 125 (32.72)                                | 0.793           |
| Requires time-consuming communication with patients                                      | 676 (58.78)           | 242 (52.49)*                                         | 184 (59.93)*                                          | 250 (65.45)*                               | 0.001           |
| Increases the risk of physicians taking more responsibility for medical malpractice      | 239 (20.78)           | 81 (17.57)                                           | 69 (22.48)                                            | 89 (23.30)                                 | 0.087           |
| Limited availability and accessibility of TCM diabetes guidelines                        | 763 (66.35)           | 317 (68.76)                                          | 211 (68.73)                                           | 235 (61.52)                                | 0.050           |
| The guideline cannot be downloaded for reading                                           | 353 (30.70)           | 153 (33.19)                                          | 99 (32.25)                                            | 101 (26.44)                                | 0.084           |
| The guideline recommendation lacks a convincing basis                                    | 276 (24.00)           | 135 (29.28)*                                         | 70 (22.80)*                                           | 71 (18.59)*                                | 0.001           |



STROBE Statement—Checklist of items that should be included in reports of *cross-sectional studies*

|                              | Item No | Recommendation                                                                                                                                                                                    | Page/line numbers |
|------------------------------|---------|---------------------------------------------------------------------------------------------------------------------------------------------------------------------------------------------------|-------------------|
| <b>Title and abstract</b>    | 1       | (a) Indicate the study's design with a commonly used term in the title or the abstract                                                                                                            | Page 1, 2         |
|                              |         | (b) Provide in the abstract an informative and balanced summary of what was done and what was found                                                                                               | Page 2            |
| <b>Introduction</b>          |         |                                                                                                                                                                                                   |                   |
| Background/rationale         | 2       | Explain the scientific background and rationale for the investigation being reported                                                                                                              | Page 3, 4         |
| Objectives                   | 3       | State specific objectives, including any prespecified hypotheses                                                                                                                                  | Page 4            |
| <b>Methods</b>               |         |                                                                                                                                                                                                   |                   |
| Study design                 | 4       | Present key elements of study design early in the paper                                                                                                                                           | Page 5            |
| Setting                      | 5       | Describe the setting, locations, and relevant dates, including periods of recruitment, exposure, follow-up, and data collection                                                                   | Page 5, 6         |
| Participants                 | 6       | (a) Give the eligibility criteria, and the sources and methods of selection of participants                                                                                                       | Page 5            |
| Variables                    | 7       | Clearly define all outcomes, exposures, predictors, potential confounders, and effect modifiers. Give diagnostic criteria, if applicable                                                          | Page 5            |
| Data sources/<br>measurement | 8*      | For each variable of interest, give sources of data and details of methods of assessment (measurement). Describe comparability of assessment methods if there is more than one group              | Page 5, 6         |
| Bias                         | 9       | Describe any efforts to address potential sources of bias                                                                                                                                         | Page 5            |
| Study size                   | 10      | Explain how the study size was arrived at                                                                                                                                                         | Page 6            |
| Quantitative<br>variables    | 11      | Explain how quantitative variables were handled in the analyses. If applicable, describe which groupings were chosen and why                                                                      | Page 6            |
| Statistical methods          | 12      | (a) Describe all statistical methods, including those used to control for confounding                                                                                                             | Page 6            |
|                              |         | (b) Describe any methods used to examine subgroups and interactions                                                                                                                               | Page 6            |
|                              |         | (c) Explain how missing data were addressed                                                                                                                                                       | NA                |
|                              |         | (d) If applicable, describe analytical methods taking account of sampling strategy                                                                                                                | NA                |
|                              |         | (e) Describe any sensitivity analyses                                                                                                                                                             | NA                |
| <b>Results</b>               |         |                                                                                                                                                                                                   |                   |
| Participants                 | 13*     | (a) Report numbers of individuals at each stage of study—eg numbers potentially eligible, examined for eligibility, confirmed eligible, included in the study, completing follow-up, and analysed | Page 6            |
|                              |         | (b) Give reasons for non-participation at each stage                                                                                                                                              | NA                |
|                              |         | (c) Consider use of a flow diagram                                                                                                                                                                | NA                |
| Descriptive data             | 14*     | (a) Give characteristics of study participants (eg demographic, clinical, social) and information on exposures and potential confounders                                                          | Page 6            |
|                              |         | (b) Indicate number of participants with missing data for each variable of interest                                                                                                               | Page 6            |
| Outcome data                 | 15*     | Report numbers of outcome events or summary measures                                                                                                                                              | NA                |
| Main results                 | 16      | (a) Give unadjusted estimates and, if applicable, confounder-adjusted estimates and their precision (eg, 95% confidence interval). Make clear                                                     | NA                |

|                          |    |                                                                                                                                                                            |                    |
|--------------------------|----|----------------------------------------------------------------------------------------------------------------------------------------------------------------------------|--------------------|
|                          |    | which confounders were adjusted for and why they were included                                                                                                             |                    |
|                          |    | (b) Report category boundaries when continuous variables were categorized                                                                                                  | NA                 |
|                          |    | (c) If relevant, consider translating estimates of relative risk into absolute risk for a meaningful time period                                                           | NA                 |
| Other analyses           | 17 | Report other analyses done—eg analyses of subgroups and interactions, and sensitivity analyses                                                                             | Page 8 to page 12  |
| <b>Discussion</b>        |    |                                                                                                                                                                            |                    |
| Key results              | 18 | Summarise key results with reference to study objectives                                                                                                                   | Page 13            |
| Limitations              | 19 | Discuss limitations of the study, taking into account sources of potential bias or imprecision. Discuss both direction and magnitude of any potential bias                 | Page 15            |
| Interpretation           | 20 | Give a cautious overall interpretation of results considering objectives, limitations, multiplicity of analyses, results from similar studies, and other relevant evidence | Page 13 to page 15 |
| Generalisability         | 21 | Discuss the generalisability (external validity) of the study results                                                                                                      | Page 15            |
| <b>Other information</b> |    |                                                                                                                                                                            |                    |
| Funding                  | 22 | Give the source of funding and the role of the funders for the present study and, if applicable, for the original study on which the present article is based              | Page 16            |

\*Give information separately for exposed and unexposed groups.

NA: Not applicable.

**Note:** An Explanation and Elaboration article discusses each checklist item and gives methodological background and published examples of transparent reporting. The STROBE checklist is best used in conjunction with this article (freely available on the Web sites of PLoS Medicine at <http://www.plosmedicine.org/>, Annals of Internal Medicine at <http://www.annals.org/>, and Epidemiology at <http://www.epidem.com/>). Information on the STROBE Initiative is available at [www.strobe-statement.org](http://www.strobe-statement.org).

# BMJ Open

## Nationwide Survey of Physicians' Familiarity and Awareness of Diabetes Guidelines in China: A Cross-sectional Study

|                                 |                                                                                                                                                                                                                                                                                                                                                                                                                                                                                                                                                                                                                                                                                                                                                                                                                                                                                                                                                   |
|---------------------------------|---------------------------------------------------------------------------------------------------------------------------------------------------------------------------------------------------------------------------------------------------------------------------------------------------------------------------------------------------------------------------------------------------------------------------------------------------------------------------------------------------------------------------------------------------------------------------------------------------------------------------------------------------------------------------------------------------------------------------------------------------------------------------------------------------------------------------------------------------------------------------------------------------------------------------------------------------|
| Journal:                        | <i>BMJ Open</i>                                                                                                                                                                                                                                                                                                                                                                                                                                                                                                                                                                                                                                                                                                                                                                                                                                                                                                                                   |
| Manuscript ID                   | bmjopen-2023-074301.R2                                                                                                                                                                                                                                                                                                                                                                                                                                                                                                                                                                                                                                                                                                                                                                                                                                                                                                                            |
| Article Type:                   | Original research                                                                                                                                                                                                                                                                                                                                                                                                                                                                                                                                                                                                                                                                                                                                                                                                                                                                                                                                 |
| Date Submitted by the Author:   | 20-Nov-2023                                                                                                                                                                                                                                                                                                                                                                                                                                                                                                                                                                                                                                                                                                                                                                                                                                                                                                                                       |
| Complete List of Authors:       | Jia, Liyan; The First Affiliated Hospital of Xiamen University, Huang, Caoxin; The First Affiliated Hospital of Xiamen University, Xiamen Diabetes Institute<br>Zhao, Neng-jiang; First Affiliated Hospital of Xiamen University<br>Lai, Bao-yong; Beijing University of Chinese Medicine Xiamen Hospital<br>Zhang, Zhi-hai; First Affiliated Hospital of Xiamen University<br>Li, Le; First Affiliated Hospital of Xiamen University<br>Zhan, Na; Fujian University of Traditional Chinese Medicine<br>Yuan-bing, Lin; Fujian University of Traditional Chinese Medicine<br>Cai, Miao-na; First Affiliated Hospital of Xiamen University<br>Wang, Shunqin ; Beijing University of Chinese Medicine Xiamen Hospital<br>Yan, Bing; Xiamen Diabetes Institute,<br>Liu, Jianping; Beijing University of Traditional Chinese Medicine, ; NAFKAM, Department of Community Medicine<br>Yang, Shu-yu; The First Affiliated Hospital of Xiamen University |
| <b>Primary Subject Heading</b>: | Diabetes and endocrinology                                                                                                                                                                                                                                                                                                                                                                                                                                                                                                                                                                                                                                                                                                                                                                                                                                                                                                                        |
| Secondary Subject Heading:      | Diabetes and endocrinology, Medical education and training                                                                                                                                                                                                                                                                                                                                                                                                                                                                                                                                                                                                                                                                                                                                                                                                                                                                                        |
| Keywords:                       | General diabetes < DIABETES & ENDOCRINOLOGY, Physicians, Protocols & guidelines < HEALTH SERVICES ADMINISTRATION & MANAGEMENT                                                                                                                                                                                                                                                                                                                                                                                                                                                                                                                                                                                                                                                                                                                                                                                                                     |
|                                 |                                                                                                                                                                                                                                                                                                                                                                                                                                                                                                                                                                                                                                                                                                                                                                                                                                                                                                                                                   |

SCHOLARONE™  
Manuscripts



I, the Submitting Author has the right to grant and does grant on behalf of all authors of the Work (as defined in the below author licence), an exclusive licence and/or a non-exclusive licence for contributions from authors who are: i) UK Crown employees; ii) where BMJ has agreed a CC-BY licence shall apply, and/or iii) in accordance with the terms applicable for US Federal Government officers or employees acting as part of their official duties; on a worldwide, perpetual, irrevocable, royalty-free basis to BMJ Publishing Group Ltd ("BMJ") its licensees and where the relevant Journal is co-owned by BMJ to the co-owners of the Journal, to publish the Work in this journal and any other BMJ products and to exploit all rights, as set out in our [licence](#).

The Submitting Author accepts and understands that any supply made under these terms is made by BMJ to the Submitting Author unless you are acting as an employee on behalf of your employer or a postgraduate student of an affiliated institution which is paying any applicable article publishing charge ("APC") for Open Access articles. Where the Submitting Author wishes to make the Work available on an Open Access basis (and intends to pay the relevant APC), the terms of reuse of such Open Access shall be governed by a Creative Commons licence – details of these licences and which [Creative Commons](#) licence will apply to this Work are set out in our licence referred to above.

Other than as permitted in any relevant BMJ Author's Self Archiving Policies, I confirm this Work has not been accepted for publication elsewhere, is not being considered for publication elsewhere and does not duplicate material already published. I confirm all authors consent to publication of this Work and authorise the granting of this licence.

# Nationwide Survey of Physicians' Familiarity and Awareness of Diabetes Guidelines in China: A

## Cross-sectional Study

Li-yan Jia<sup>1</sup>, Cao-xin Huang<sup>2</sup>, Neng-jiang Zhao<sup>1</sup>, Bao-yong Lai<sup>3</sup>, Zhi-hai Zhang<sup>1</sup>, Le Li<sup>1</sup>, Na Zhan<sup>4</sup>, Yuan-bing

Lin<sup>4</sup>, Miao-na Cai<sup>1</sup>, Shun-qin Wang<sup>3</sup>, Bing Yan<sup>1</sup>, Jian-ping Liu<sup>5</sup>, Shu-yu Yang<sup>1,6</sup>

1. The First Affiliated Hospital of Xiamen University, Xiamen, China.
2. Xiamen Diabetes Institute, Department of Endocrinology and Metabolism, The First Affiliated Hospital of Xiamen University, Xiamen, China.
3. Beijing University of Chinese Medicine Xiamen Hospital, Xiamen, China.
4. Graduate school, Fujian University of traditional Chinese Medicine, Xiamen, China.
5. Centre for evidence-based Chinese medicine, Beijing University of Chinese Medicine, Beijing, China.
6. Center of integrated Chinese and western medicine, Xiamen University, Xiamen, China.

### Corresponding author:

Shu-yu Yang, MD, PhD, Professor (ORCID: <https://orcid.org/0000-0003-2950-0861>)

The First Affiliated Hospital of Xiamen University;

Center of integrated Chinese and western medicine, Xiamen University;

Xiamen 361003, China

Email: [xmyangshuyu@xmu.edu.cn](mailto:xmyangshuyu@xmu.edu.cn)

Tel: +86 13950062003

**ABSTRACT**

Objective: To investigate physicians' familiarity and awareness of four diabetes guidelines, and their practice of the recommendations outlined in these guidelines.

Design: A cross-sectional study.

Setting: An online questionnaire survey was conducted among physicians affiliated with the Specialist Committee for Primary Diabetes Care of China Association of Chinese Medicine, using the snowball sampling method to ensure a broader representation of physicians.

Participants: 1150 physicians from 192 cities across 30 provinces in China provided complete data.

Results: Tertiary care hospital physicians (TCPs) exhibited the highest familiarity with the *Guideline for the Prevention and Treatment of Type 2 Diabetes Mellitus in China* (91.3%), followed by the *National Guidelines for the Prevention and Control of Diabetes in Primary Care* (76.8%), the *Standards of Medical Care in Diabetes* (72.2%) and the *Guidelines for Prevention and Treatment of Diabetes in Chinese Medicine* (63.8%). Primary care practitioners (PCPs) exhibited familiarity with these four guidelines at about 50% or less. Self-reported reference to modern diabetes guidelines by physicians more frequent than traditional Chinese medicine (TCM) diabetes guidelines, with rates at 73.2% and 33.8%, respectively. Approximately 90% of physicians provided instructions on self-monitoring of blood glucose to their patients with diabetes. Less than one-third of physicians referred patients to a specialized nutritionist. In terms of health education management, TCPs reported having a diabetes health management team at the rate of 75.7%, followed by secondary care hospital physicians (SCPs) at 57.0% and PCPs at 27.5%. Furthermore, approximately 40% of physicians did not fully grasp hypoglycemia characteristics.

Conclusions: Familiarity and awareness of the screening guidelines varied among physicians in different hospital settings. Importantly, significant discrepancies were observed between physicians' awareness and their self-reported reference to modern medicine guidelines and TCM guidelines. It is essential to consistently provide education and training on diabetes management for all physicians, particularly PCPs.

**KEY WORDS:** Diabetes Mellitus; Guidelines; Physician Awareness

**Strengths and limitations of this study**

① This nationwide questionnaire survey involved 1150 physicians from hospitals of different levels in China, aiming to analyze the differences in familiarity and awareness of both Chinese and international diabetes guidelines among different physician groups. The results provided nationally representative evidence regarding physicians' familiarity and awareness of these guidelines.

② Apart from the self-reported familiarity and reference questionnaire items, our study also identified several facilitating factors and barriers to the implementation of diabetes guidelines among different physician groups.

③ Although we have included multiple-choice questions to gather more comprehensive information, we acknowledge that the survey questionnaire may not cover all specific aspects related to physicians' awareness of the diabetes guidelines.

## 1. INTRODUCTION

Diabetes is a metabolic disorder caused by the interplay of genetic and environmental factors, which has become a critical global health concern worldwide due to its high prevalence and associated disability and mortality rates [1,2]. According to the latest data published by International Diabetes Federation (IDF), an estimated 537 million adults worldwide have been diagnosed with diabetes [3]. China currently bears the highest burden of diabetes globally, with approximately 141 million individuals living with the disease aged between 20 and 79 years. Moreover, it is predicted that the number of diabetes cases in China will continue to grow significantly [4]. However, recent national data on chronic diseases and their risk factors in China indicate that awareness, treatment, and control rates for diabetes were 36.7%, 32.9%, and 50.1%, respectively, which have not changed significantly since 2013[5,6]. Therefore, addressing this substantial public health issue is crucial, with the objective of enhancing the national diabetes awareness rate, treatment rate, and control rate.

Clinical practice guidelines (CPGs) are statements that facilitate optimal disease management for health professionals and patients. However, to ensure effective implementation and adherence to guidelines, it is crucial to enhance health professionals' familiarity and awareness of CPGs [7]. Previous studies have emphasized the significance of physician awareness in the successful adoption of cardiovascular disease

1 prevention guidelines, asthma guidelines, chronic kidney disease guidelines, etc [8-10]. A systematic review  
2  
3 identified lack of physician awareness and familiarity with guidelines as the primary factors contributing to  
4  
5 deviation from recommended therapy [11]. Notably, a cross-sectional study highlighted that physicians' lack of  
6  
7 knowledge and patients' unawareness of guidelines could account for about 70% of non-adherence [12].  
8  
9  
10 Therefore, emphasizing physicians' familiarity and awareness of clinical guidelines is essential for optimizing  
11  
12  
13 patient management.  
14

15  
16 Modern medicine, with strategies like insulin injections and oral medications like *Metformin*, is vital for  
17  
18 managing diabetes. However, the effectiveness of these methods isn't always absolute and they are not  
19  
20 consistently well-tolerated [13]. The full potential of managing Type 2 Diabetes Mellitus (T2DM) side effects,  
21  
22 discomfort, and complications with Western medicine alone has not yet been realized. Traditional Chinese  
23  
24 medicine (TCM) methods may be a potential complementary approach, given the relatively minor side effects  
25  
26 of natural herbs, non-drug therapies, and external treatment [14]. Previous studies have reported that TCM  
27  
28 therapies are beneficial for the comprehensive prevention and treatment of diabetes, particularly when  
29  
30 combined with Western medicine, where it can play a significant role in enhancing effectiveness. Studies  
31  
32 showed TCM therapies used in conjunction with Western medicine can potentially not only improve clinical  
33  
34 outcomes (such as weight loss, self-reported symptoms, glucose metabolism), but also reduce medicinal  
35  
36 dosages and delay diabetes progression [15,16]. For example, the use of TCM in conjunction with Western  
37  
38 medicine can alleviate discomforts from drugs, such as bloating induced by *Acarbose* [17]. Additionally,  
39  
40 diabetic peripheral neuropathy characterized by sensations of coolness, numbness, and limb pain, an integrated  
41  
42 approach using specific TCM prescriptions, such as *Buyang Huanwu Decoction* and *Danggui Sini Decoction*,  
43  
44 as well as external treatments like herbal foot baths, can significantly enhance therapy's effectiveness [18].  
45  
46  
47 Therefore, specific TCM measures were suggested as adjuvant therapy for individuals with diabetes in a wide  
48  
49  
50 range of clinical research studies. Furthermore, the TCM treatment measures for diabetes (including the  
51  
52 integration of TCM into the comprehensive treatment of diabetes, alleviating patient-reported symptoms,  
53  
54  
55  
56  
57  
58  
59  
60



1 preventing or alleviating complications, TCM non-drug therapies and external treatments, etc.) are  
2  
3 recommended as adjuvant therapies for diabetes prevention and treatment in the '*Guideline for the Prevention*  
4  
5 *and Treatment of T2DM in China (2020)*' and the '*National Guidelines for the Prevention and Control of*  
6  
7 *Diabetes in Primary Care (2022)*' [19,20].  
8  
9

10 To effectively enhance the prevention and standardized management of diabetes mellitus, a series of  
11  
12 clinical guideline documents have been released both domestically and internationally. Including annually  
13  
14 updated *Standards of Medical Care in Diabetes* issued by the American Diabetes Association (ADA) since  
15  
16 1994. This is one of the diabetes guidelines that is widely recognized internationally [21]. China has been  
17  
18 publishing its first 'Clinical Diabetes Guidelines in China' since 2000, which are updated on average every 3  
19  
20 years. The most recent update is *Guideline for the Prevention and Treatment of T2DM in China (2020)*  
21  
22 issued by Chinese Diabetes Society (CDS) [19]. Additionally, the '*National Guidelines for the Prevention and*  
23  
24 *Control of Diabetes in Primary Care (2018)*' was published for the first time in 2018, and it was updated in  
25  
26 2022 [20]. Notably, the first diabetes guideline within the field of TCM, '*Guidelines for Prevention and*  
27  
28 *Treatment of Diabetes in Chinese Medicine*', issued by China Association of Chinese Medicine (CACM) in  
29  
30 2007 [22]. In China, the recommendations for the treatment of diabetes by Western medicine combined with  
31  
32 Chinese medicine mainly refer to these four guidelines. Therefore, four guidelines mentioned above are  
33  
34 considered as the screening guidelines investigated in this study. To provide nationally representative evidence  
35  
36 regarding the familiarity and awareness of physicians with diabetes guidelines in China, we conducted a  
37  
38 nationwide survey to compare physicians' awareness, self-reported reference status and practice of different  
39  
40 diabetes guidelines. Additionally, we examined the differences among physicians from hospitals at different  
41  
42 levels. Furthermore, the facilitating factors and barriers to implementation of diabetes guidelines among  
43  
44 different physician groups were identified in this study.  
45  
46  
47  
48  
49  
50  
51  
52  
53  
54  
55

## 56 **2. RESEARCH DESIGN AND METHODS**

### 57 **2.1 Survey design**

1 This is an investigator-initiated, non-commercial survey of physicians at various levels of hospitals in  
2  
3 China. This work was conducted by the Specialist Committee for Primary Diabetes Care of China Association  
4  
5 of Chinese Medicine, a national academic institution. A majority of physicians who are members of the  
6  
7 Specialist Committee participated in the survey questionnaire. The questionnaire was distributed electronically  
8  
9 to the participants, and electronic written informed consent from respondents was required before proceeding  
10  
11 with the survey. Additionally, participants were requested to assist in forwarding the questionnaire to other  
12  
13 general practitioners, physicians, and experts using the snowball sampling method. In the overall design of this  
14  
15 survey, we aimed to ensure broader representation of respondents by recruiting physicians from different grades  
16  
17 of hospitals in China, including tertiary to primary medical institutions. Additionally, the endocrinology  
18  
19 diabetes specialists, general practitioners, and TCM physicians were mainly recruited.  
20  
21  
22  
23  
24

## 26 **2.2 Questionnaire and pretest**

29 A questionnaire comprising four sections was established with a total of 42 items. Section I assessed  
30  
31 participants' clinical background and basic demographic data. Section II evaluated participants' familiarity with  
32  
33 and self-reported reference status regarding various diabetes guidelines, presented as single-choice questions in  
34  
35 the form of Likert scales. Section III examined participants' awareness and practice of specific measures  
36  
37 outlined in diabetes guidelines, accompanied by a list of guideline-based recommendations provided in  
38  
39 Appendix 1. The guideline action statements were rephrased as options in both single-choice and  
40  
41 multiple-choice formats, enabling respondents to choose the most appropriate answers. Lastly, section IV  
42  
43 investigated the facilitating factors and barriers during the process of guideline implementation.  
44  
45  
46  
47  
48

50 The questionnaire underwent a pilot test involving 24 physicians from Fujian and Gansu provinces in  
51  
52 China from Aug 20, 2021 to Aug 27, 2021. Additionally, experts familiar with these diabetes guidelines were  
53  
54 invited to evaluate the contents of the questionnaire. Subsequently, the questionnaire was optimized based on  
55  
56 feedback received during the pilot survey and expert consultation meeting.  
57  
58  
59

## 60 **2.3 Sample and administration**

1 The sample size calculation was completed in accordance with the cross-sectional survey formula  $N =$   
2  
3  $(Z_{\alpha}^2 * pq) / (d^2)$  [23]. According to a literature search, the estimated value of  $p$  is 26.2% (the projected rate of  
4  
5 Chinese physicians being very familiar with the diabetes guidelines),  $q = 1 - p$ , and  $d = 0.1 * p$ . Assuming a 5%  
6  
7 two-tailed type-I error ( $Z_{\alpha} = 1.96$ ) and a two-sided 95% confidence level, the estimated result of  $N$  was 1082.  
8  
9  
10 The investigation was performed from Sep 22, 2021 to Oct 29, 2021, a total of 1 162 participants completed the  
11  
12 survey. The logical discrepancies or potential errors found in the questionnaires were resolved through  
13  
14 telephone communication with the respondents.  
15  
16

## 17 18 **2.4 Statistical analysis**

19  
20  
21 Statistics analysis was performed using SAS Version 9.4. Continuous variables were presented as means  
22  
23 with  $\pm$ SDs, and categorical variables as counts ( $n$ ) and percentages (%). Pearson's Chi-square test was used to  
24  
25 compare categorical variables, and the Wilcoxon rank-sum test was used for non-parametric numerical  
26  
27 variables. Moreover, the Cochran-Mantel-Haenszel (CMH) test was used for ordinal categorical variables.  
28  
29 Differences in guidelines familiarity and awareness among different physician groups, including tertiary care  
30  
31 hospital physicians (TCPs), secondary care hospital physicians (SCPs), and primary care practitioners (PCPs),  
32  
33 were analyzed. In this study, the percentage differences among groups were reported, with statistically  
34  
35 significant differences indicated by  $P$ -value  $< 0.05$ .  
36  
37  
38  
39  
40  
41

## 42 **2.5 Patient and Public Involvement**

43  
44 Patients and/or the public were not involved in the design, or conduct, or reporting, or dissemination plans  
45  
46 of our research.  
47  
48

## 49 **3. RESULTS**

### 50 51 **3.1 Sample characteristics**

52  
53 A total of 1,162 questionnaires were collected. Among these, we finally included 1,150 questionnaires  
54  
55 (99.0%) from physicians after excluding 12 questionnaires (7 from nurses, 2 from pharmacists, and 3 from  
56  
57 medical teachers). Among the included questionnaires, 461 (40.1%) were obtained from TCPs, 307 (26.7%)  
58  
59  
60

1 were obtained from SCPs, and 382 (33.2%) were obtained from PCPs. There were significant differences  
2  
3 among the three groups of physicians in terms of gender, educational level, professional category, years in  
4  
5 practice, technical title, diabetes practice setting and number of patients with diabetes treated per week ( $P <$   
6  
7 0.05). The full characteristics of the physicians are presented in Supplemental Appendix1.  
8  
9

### 10 **3.2 Physicians' familiarity with diabetes guidelines**

11  
12  
13 Physicians' familiarity with diabetes guidelines is demonstrated in Figure1. In the overall sample, the  
14  
15 rankings of familiarity (including both very familiar and relatively familiar) with the four guidelines were as  
16  
17 follows: *Guideline for the Prevention and Treatment of Type 2 Diabetes Mellitus in China* (75.8%), *National*  
18  
19 *Guidelines for the Prevention and Control of Diabetes in Primary Care* (66.3%), *Guidelines for Prevention and*  
20  
21 *Treatment of Diabetes in Chinese Medicine* (51.4%), and *Standards of Medical Care in Diabetes* (50.8%).  
22  
23  
24  
25  
26  
27  
28  
29  
30  
31  
32  
33  
34  
35  
36  
37  
38  
39  
40  
41  
42  
43  
44  
45  
46  
47  
48  
49  
50  
51  
52  
53  
54  
55  
56  
57  
58  
59  
60  
TCPs exhibited a higher likelihood of familiarity with these four guidelines compared to other groups. Particularly, TCPs demonstrated the highest familiarity with the *Guideline for the Prevention and Treatment of Type 2 Diabetes Mellitus in China* (91.3%), followed by SCPs (83.4%), and PCPs (51.0%) ( $P < 0.001$ ). Similarly, TCPs exhibited a higher level of familiarity (76.8%) with the *National Guidelines for the Prevention and Control of Diabetes in Primary Care* compared to SCPs (69.4%) and PCPs (51.1%) ( $P < 0.001$ ). In terms of the *Guidelines for Prevention and Treatment of Diabetes in Chinese Medicine*, TCPs exhibited the highest level of familiarity (72.2%), followed by SCPs (52.8%), and PCPs (35.3%) ( $P < 0.001$ ). Lastly, various degrees of familiarities with the *Standards of Medical Care in Diabetes* were observed among TCPs (63.8%), SCPs (54.1%), and PCPs (22.3%) ( $P < 0.001$ ).

51 Insert "Figure1. Familiarity of physicians from different levels of hospitals with four diabetes guidelines (TCPs,  
52  
53 tertiary care hospital physicians; SCPs, secondary care hospital physicians; PCPs, primary care practitioners)"  
54  
55  
56

### 57 **3.3 Physicians' self-reported reference status of diabetes guidelines**

58  
59  
60  
Physicians' self-reported reference status of diabetes guidelines summarized in Table1. In terms of modern

medicine guidelines, the rates of “frequent reference” were 80.9%, 77.2% and 60.7% for TCPs, SCPs and PCPs, respectively, indicating a stronger compliance in TCPs group ( $P < 0.001$ ). In comparison, the rates of “frequent reference” to TCM guidelines were 36.2% for TCPs, 36.5% for SCPs and 28.8% for PCPs, suggesting that the compliance to TCM guidelines was relatively low across all groups. No significant differences about the compliance to TCM guidelines were observed among these three physicians groups ( $P = 0.071$ ).

Table 1. Physicians’ self-reported reference status of diabetes guidelines [n(%)]

| Categories                                 |                      | Overall<br>(n = 1150) | Physicians in different level hospitals              |                                                       |                                            | P-value |
|--------------------------------------------|----------------------|-----------------------|------------------------------------------------------|-------------------------------------------------------|--------------------------------------------|---------|
|                                            |                      |                       | Tertiary care<br>hospital<br>physicians<br>(n = 461) | Secondary care<br>hospital<br>physicians<br>(n = 307) | Primary care<br>practitioners<br>(n = 382) |         |
| Modern medicine<br>guidelines <sup>a</sup> | Frequent reference   | 842 (73.2)            | 373 (80.9)                                           | 237 (77.2)                                            | 232 (60.7)                                 | < 0.001 |
|                                            | Occasional reference | 236 (20.5)            | 75 (16.3)                                            | 59 (19.2)                                             | 102 (26.7)                                 |         |
|                                            | Infrequent reference | 53 (4.6)              | 9 (2.0)                                              | 8 (2.6)                                               | 36 (9.4)                                   |         |
|                                            | Rare reference       | 17 (1.5)              | 4 (0.9)                                              | 3 (1.0)                                               | 10 (2.6)                                   |         |
|                                            | No reference         | 2 (0.2)               | 0 (0.0)                                              | 0 (0.0)                                               | 2 (0.5)                                    |         |
| TCM guidelines <sup>b</sup>                | Frequent reference   | 389 (33.8)            | 167 (36.2)                                           | 112 (36.5)                                            | 110 (28.8)                                 | 0.071   |
|                                            | Occasional reference | 459 (39.9)            | 182 (39.5)                                           | 127 (41.4)                                            | 150 (39.3)                                 |         |
|                                            | Infrequent reference | 186 (16.2)            | 66 (14.3)                                            | 41 (13.4)                                             | 79 (20.7)                                  |         |
|                                            | Rare no reference    | 89 (7.7)              | 34 (7.4)                                             | 25 (8.1)                                              | 30 (7.9)                                   |         |
|                                            | No reference         | 27 (2.4)              | 12 (2.6)                                             | 2 (0.7)                                               | 13 (3.4)                                   |         |

a. Modern medicine guidelines including *Standards of Medical Care in Diabetes* issued by the American Diabetes Association, *Guideline for the Prevention and Treatment of Type 2 Diabetes Mellitus in China* and *National Guidelines for the Prevention and Control of Diabetes in Primary Care* issued by Chinese Diabetes Society. b. TCM guidelines including *Guidelines for Prevention and Treatment of Diabetes in Chinese Medicine* issued by China Association of Chinese Medicine.

### 3.4 Physicians’ awareness and practice of contents from diabetes guidelines

The objective of this section is to assess physicians' awareness and practice of the recommendations outlined in the diabetes guidelines. These recommendations encompass various aspects, including dietary management, physical exercise, self-monitoring of blood glucose (SMBG), health education, hypoglycemia knowledge, as well as treatment approaches based on TCM differentiation. Detailed information regarding specific recommendations can be found in supplemental appendix 2.

#### (1) Management of diet and physical exercise

In terms of dietary management for patients with diabetes, the proportions of TCPs, SCPs and PCPs

choosing "Hand over to a specialized nutritionist or comprehensive management team" were 39.5%, 25.7% and 22.8% respectively ( $P < 0.001$ ). In addition, the proportions of TCPs, SCPs and PCPs choosing "Personally evaluate the nutritional status of patients and provide detailed nutritional treatment suggestions and goals" were 61.4%, 61.6% and 44.0% respectively ( $P < 0.001$ ). It is noteworthy that PCPs had the highest proportions (54%) to choose "Due to the limited consultation time, patients are only given basic dietary advice" compared to TCPs (28.0%) and SCPs (24.4%) ( $P = 0.018$ ).

In terms of physical exercise management, the proportions of TCPs, SCPs and PCPs choosing "Hand over to a specialized health manager or professional manager team" were 29.3%, 21.2% and 20.2% respectively ( $P = 0.003$ ). Similarly, the proportions of TCPs, SCPs and PCPs choosing "Personally evaluate the health and athletic ability of patients, then provide detailed exercise recommendations" were 66.6%, 69.7% and 52.9% respectively ( $P < 0.001$ ). Furthermore, regarding the distribution of brochures, the preference ranked from highest to lowest as follows: SCPs (67.8%), PCPs (65.5%), and TCPs (56.0%) ( $P = 0.001$ ). Detailed results are illustrated in Table 2.

Table 2. Physicians' practice of dietary and exercise recommendations according to diabetes guidelines [n(%)]

| Categories                                                                                                                                 | Overall<br>(n = 1150) | Physicians in different level hospitals              |                                                       |                                            | P-value |
|--------------------------------------------------------------------------------------------------------------------------------------------|-----------------------|------------------------------------------------------|-------------------------------------------------------|--------------------------------------------|---------|
|                                                                                                                                            |                       | Tertiary care<br>hospital<br>physicians<br>(n = 461) | Secondary care<br>hospital<br>physicians<br>(n = 307) | Primary care<br>practitioners<br>(n = 382) |         |
| Hand over to a specialized nutritionist or comprehensive management team                                                                   | 348 (30.3)            | 182 (39.5)                                           | 79 (25.7)                                             | 87 (22.8)                                  | < 0.001 |
| Personally evaluate the nutritional status of patients and provide detailed nutritional treatment suggestions and goals                    | 640 (55.7)            | 283 (61.4)                                           | 189 (61.6)                                            | 168 (44.0)                                 | < 0.001 |
| Dietary management Advise patients to follow specific dietary patterns, for example, the Mediterranean diet, a low-fat and low-energy diet | 626 (54.4)            | 263 (57.1)                                           | 163 (53.1)                                            | 200 (52.4)                                 | 0.340   |
| Distribute brochures                                                                                                                       | 701 (61.0)            | 265 (57.5)                                           | 199 (64.8)                                            | 237 (62.0)                                 | 0.108   |
| Provide dietary guidance based on the TCM principle of food and medicine sharing the same source                                           | 546 (47.5)            | 208 (45.1)                                           | 147 (47.9)                                            | 191 (50.0)                                 | 0.364   |
| Due to the limited consultation                                                                                                            | 334 (29.0)            | 129 (28.0)                                           | 75 (24.4)                                             | 130 (54.0)                                 | 0.018   |

time, patients are only given  
basic dietary advice

|    |            |            |            |            |            |         |
|----|------------|------------|------------|------------|------------|---------|
| 1  |            |            |            |            |            |         |
| 2  |            |            |            |            |            |         |
| 3  |            |            |            |            |            |         |
| 4  |            | 277 (24.1) | 135 (29.3) | 65 (21.2)  | 77 (20.2)  | 0.003   |
| 5  |            |            |            |            |            |         |
| 6  |            |            |            |            |            |         |
| 7  |            |            |            |            |            |         |
| 8  |            | 723 (62.9) | 307 (66.6) | 214 (69.7) | 202 (52.9) | < 0.001 |
| 9  |            |            |            |            |            |         |
| 10 |            |            |            |            |            |         |
| 11 |            |            |            |            |            |         |
| 12 | Physical   |            |            |            |            |         |
| 13 | exercise   |            |            |            |            |         |
| 14 | management | 453 (39.4) | 161 (34.9) | 120 (39.1) | 172 (45.0) | 0.011   |
| 15 |            |            |            |            |            |         |
| 16 |            |            |            |            |            |         |
| 17 |            | 716 (62.3) | 258 (56.0) | 208 (67.8) | 250 (65.5) | 0.001   |
| 18 |            |            |            |            |            |         |
| 19 |            | 539 (46.9) | 207 (44.9) | 152 (49.5) | 180 (47.1) | 0.452   |
| 20 |            |            |            |            |            |         |
| 21 |            |            |            |            |            |         |
| 22 |            |            |            |            |            |         |
| 23 |            | 389 (33.8) | 158 (34.3) | 97 (31.6)  | 134 (35.1) | 0.609   |
| 24 |            |            |            |            |            |         |
| 25 |            |            |            |            |            |         |

## (2) Instruction on self-monitoring of blood glucose and health education management

Physicians' instruction on self-monitoring of blood glucose and the availability of health management team was also observed. These results revealed that TCPs (96.5%) exhibited the highest rate of SMBG instruction (including both comprehensive guidance and frequent guidance) compared to SCPs (94.5%) and PCPs (88.0%) ( $P < 0.001$ ). In terms of health education management, 75.7% of TCPs reported the presence of diabetes health management teams, followed by SCPs (57.0%) and PCPs (27.5%) ( $P < 0.001$ ). Detailed results are demonstrated in Figure2.

Insert "Figure2. Physicians' instruction on self-monitoring of blood glucose and the availability of health management team (TCPs, tertiary care hospital physicians; SCPs, secondary care hospital physicians; PCPs, primary care practitioners)"

## (3) Physicians' knowledge of hypoglycemia identification and TCM differentiation treatment

According to the guideline recommendations (supplemental appendix 2), the accurate characteristics of



hypoglycemia include options a, b, c and d, as defined in Table 3. In our exploratory analysis, the percentages of TCPs, SCPs, and PCPs choosing “a, b, c and d” were 63.6%, 65.2% and 49.5% respectively. Notably, the accuracy rate of TCPs was higher compared to SCPs and PCPs ( $P < 0.001$ ). These results indicate that approximately 40% of physicians may have insufficient understanding of the guideline recommendations on hypoglycemia. Similarly, the guidelines recommend specific prescriptions for diabetes based on TCM syndrome differentiation (supplemental appendix 2). For diabetes with Qi-Yin deficiency syndrome, prescriptions including options a, b and c in Table 3 are indicated. The accuracy rates of TCPs, SCPs, and PCPs were 86.1%, 86.3% and 83.5% respectively, showing no significant differences among these three groups of physicians ( $P = 0.477$ ). When considering diabetic neuropathy with Qi-deficiency and collateral-obstruction syndrome, interventions or prescriptions based on this syndrome differentiation involve the options a, b and c as outlined in Table 3 based on the guidelines. The accuracy rate was higher for TCPs (68.6%) than for SCPs (65.8%) and PCPs (55.0%) ( $P < 0.001$ ).

Table 3. Physicians' knowledge of hypoglycemia identification and TCM differentiation treatment [n(%)]

| Categories                                                                                                                                         | Overall<br>(n = 1150) | Physicians in different level hospitals              |                                                       |                                            | P-value |
|----------------------------------------------------------------------------------------------------------------------------------------------------|-----------------------|------------------------------------------------------|-------------------------------------------------------|--------------------------------------------|---------|
|                                                                                                                                                    |                       | Tertiary care<br>hospital<br>physicians<br>(n = 461) | Secondary care<br>hospital<br>physicians<br>(n = 307) | Primary care<br>practitioners<br>(n = 382) |         |
| The characteristics of hypoglycemia including:                                                                                                     |                       |                                                      |                                                       |                                            |         |
| a. Blood glucose < 3.9 mmol/l                                                                                                                      | 1045 (90.9)           | 409 (88.7)                                           | 282 (91.9)                                            | 354 (92.7)                                 | 0.110   |
| b. Hypoglycemia without a specific blood glucose limit, accompanied by serious events involving changes in consciousness and/or physical condition | 788 (68.5)            | 336 (72.9)                                           | 223 (72.6)                                            | 229 (60.0)                                 | < 0.001 |
| c. Symptoms of sympathetic excitement such as palpitations, anxiety, sweating, dizziness, hand tremors, and feelings of hunger                     | 1124 (97.7)           | 453 (98.3)                                           | 304 (99.0)                                            | 367 (96.1)                                 | 0.022   |
| d. Central nervous system symptoms such as changes in mental status, cognitive impairment, convulsions, and coma                                   | 1013 (88.1)           | 424 (92.0)                                           | 289 (94.1)                                            | 300 (78.5)                                 | < 0.001 |
| Accuracy rate (All above option)                                                                                                                   | 682 (59.3)            | 293 (63.6)                                           | 200 (65.2)                                            | 189 (49.5)                                 | < 0.001 |
| Prescriptions for diabetes with Qi-Yin deficiency syndrome                                                                                         |                       |                                                      |                                                       |                                            |         |
| a. Shenqi Jiangtang granule                                                                                                                        | 931 (81.0)            | 370 (80.3)                                           | 256 (83.4)                                            | 305 (79.8)                                 | 0.443   |
| b. Jinlida granule                                                                                                                                 | 507 (44.1)            | 221 (47.9)                                           | 157 (51.1)                                            | 129 (33.8)                                 | < 0.001 |



|                                                                                                               |            |            |            |            |         |
|---------------------------------------------------------------------------------------------------------------|------------|------------|------------|------------|---------|
| c. Shengmai Powder                                                                                            | 616 (53.6) | 270 (58.6) | 150 (48.9) | 196 (51.3) | 0.017   |
| d. Gegen Qinlian decoction                                                                                    | 143 (12.4) | 51 (11.1)  | 37 (12.1)  | 55 (14.4)  | 0.335   |
| e. Dachaihu decoction                                                                                         | 63 (5.5)   | 27 (5.9)   | 16 (5.2)   | 20 (5.2)   | 0.899   |
| Accuracy rate (choosing “a, b or c” without “d or e”)                                                         | 981 (85.3) | 397 (86.1) | 265 (86.3) | 319 (83.5) | 0.477   |
| <hr/>                                                                                                         |            |            |            |            |         |
| Prescriptions or interventions for diabetic neuropathy with Qi-deficiency and collateral-obstruction syndrome |            |            |            |            |         |
| a. Mudan granule                                                                                              | 608 (52.9) | 281 (61.0) | 170 (55.4) | 157 (41.1) | < 0.001 |
| b. Acupuncture                                                                                                | 510 (44.4) | 216 (46.9) | 134 (43.7) | 160 (41.9) | 0.337   |
| c. TCM fumigation                                                                                             | 650 (56.5) | 282 (61.2) | 179 (58.3) | 189 (49.5) | 0.002   |
| d. Qiming granule                                                                                             | 422 (36.7) | 145 (31.5) | 105 (34.2) | 172 (45.0) | < 0.001 |
| Accuracy rate (choosing “a, b or c” without “d”)                                                              | 728 (63.3) | 316 (68.6) | 202 (65.8) | 210 (55.0) | < 0.001 |

### 3.5 Facilitating factors and barriers to implementation of diabetes guidelines

Standardizing clinical practices, guiding patients' self-care, and the presence of high-level evidence were consistently considered as the top three facilitating factors for adherence to diabetes guidelines across the majority of physicians (see supplemental appendix 3). The majority of physicians, regardless of their level of hospital, concur on the pivotal role of guidelines in standardizing their clinical practices and improving medical quality, with no significant differences observed among the three groups (TCPs = 96.1%; SCPs = 97.1%; PCPs = 94.0%;  $P=0.118$ ). Importantly, approximately 80% of physicians in all the groups acknowledged the potential of diabetes guidelines in guiding patients' nursing practices. Notably, a statistical difference was observed among physicians from different levels of hospitals regarding their preference for “Guidelines with a high-level of evidence can be convincing” (TCPs = 71.8%; SCPs = 67.4%; PCPs = 46.1%;  $P < 0.001$ ). This finding suggests that TCPs exhibit a stronger inclination towards evidence-based recommendations compared to SCPs and PCPs.

In terms of barriers to the implementation of diabetes guidelines, the majority of physicians from different-level hospitals chose “Limited availability and accessibility of TCM diabetes guidelines” as a major obstacle (TCPs = 68.8%; SCPs = 68.7%; PCPs = 61.5%;  $P = 0.050$ ), with no significant difference observed among the three groups. Additionally, “Time-consuming communication with patients” was identified as the second most prevalent barrier to the implementation of diabetes guidelines, with the selection rates ranking

highest to lowest as follows: PCPs (65.5%), SCPs (59.9%) and TCPs (52.5%) ( $P = 0.001$ ). Lastly, in line with the pattern displayed by the facilitating factors, physicians from different levels of hospitals showed a statistically significant difference in selecting “The guideline recommendation lacks a convincing basis” (TCPs = 29.3%; SCPs = 22.8%; PCPs = 18.6%;  $P = 0.001$ ).

#### 4. DISCUSSION

This national survey of 1150 physicians aimed to investigate their familiarity and awareness of four different diabetes guidelines. Two main findings were revealed from this nationwide survey. First of all, the level of familiarity and self-reported reference status with the diabetes guidelines varied among clinicians in hospitals at different levels. Secondly, a significant discrepancy was observed between physicians’ awareness of modern medicine guidelines and TCM guidelines. Overall, TCPs exhibited the highest awareness of the diabetes guidelines, followed by SCPs and PCPs. These findings are in line with several previous studies that have reported relatively poor attitudes and adherence to guidelines among general practitioners and PCPs compared to other medical doctors [24,25]. These differences may be attributed to the additional training in diabetes management received by physicians in tertiary hospital compared to PCPs [26].

Additionally, the results indicated that rate of physicians’ self-reported reference for modern medical guidelines was approximately twice of that for TCM guidelines. This discrepancy may be attributed to several factors. Firstly, modern medical guidelines, such as *Guideline for the Prevention and Treatment of Type 2 Diabetes Mellitus in China* issued by the CDS, are based on a larger body of high level evidence from modern medicine, making them crucial for guiding clinical practice in China [27]. In contrast, the establishment of TCM guidelines is relatively recent with limited availability of high-level evidence. Moreover, the complex nature of TCM syndrome differentiation and TCM physicians’ heavy reliance on clinical experience may further worsen the discrepancy [28, 29]. Therefore, it is necessary to provide training and guidance on health management for diabetes to physicians, especially PCPs. Future studies should focus on further exploration and in-depth research of TCM diabetes guidelines.

1 Regarding physicians' knowledge of specific recommendations from diabetes guidelines, our study  
2 revealed that the majority of physicians instruct patients to conduct SMBG. However, recent national data  
3 indicate that there has been no significant improvement in the awareness, treatment, and control rates of  
4 diabetes over the past decade [5,6]. In addition, our study also revealed unsatisfactory management of diet,  
5 physical exercise, and health education. In terms of diet and physical exercise management, less than one-third  
6 of physicians choose to refer to specialized professional management teams. Furthermore, due to time  
7 constraints, more than half of PCPs provide only basic dietary advice to patients such as "paying attention to  
8 diet". However, the guidelines strongly recommend that "Patients with T2DM or pre-diabetes need to receive  
9 individualized medical nutrition guidance, which should be conducted under the guidance of nutritionists  
10 (physicians) or comprehensive management teams familiar with the nutritional treatment for diabetes" [19].  
11 The results also indicated that PCPs reported a lower rate of assistance by health management team, which is  
12 consistent with their lower self-reported rate of choosing to "Hand over to a special professional manager  
13 team". Lastly, our results suggested that some physicians may not have mastered the content of the guidelines  
14 well enough, as evidenced by approximately 40% of physicians providing inaccurate or omitted judgement  
15 about the characteristics of hypoglycemia. These data suggest a significant disparity between clinical practice  
16 and guidelines, which is consistent with previous studies [30]. Therefore, it is necessary to provide physicians  
17 with more specific training and guidance on diabetes health management, and it is imperative to further  
18 enhance the allocation of diabetes-related professional personnel and teams in primary medical institutions.

19 Similar to findings from other studies, our study also identified several facilitating factors and barriers to  
20 the implementation of diabetes guidelines [31,32]. Regarding the facilitating factors for the implementation of  
21 diabetes guidelines, most physicians believed that guidelines can standardize clinical practice, improve medical  
22 quality, and guide patients in self-care. This indicates that the significance of guidelines is recognized by the  
23 majority of physicians [33]. Although our study provides important insights into facilitating factors in the  
24 implementation of guidelines, some barriers to guideline implementation must be considered. Our results

1 indicate that limited availability and accessibility of TCM diabetes guidelines are major barriers. Indeed,  
2  
3 previous studies have shown that TCM guidelines have been established relatively recently, indicating that  
4  
5 further investigation focusing on the TCM diabetes guidelines should be required [26]. Meanwhile, it is  
6  
7 essential to publish these guidelines on multiple platforms, including freely accessible ones, so that all  
8  
9 physicians can download and study them. In addition, consistent with previous studies, PCPs demonstrated less  
10  
11 awareness about the latest evidence, in contrast to TCPs. Research conducted by B Carlsen highlighted that  
12  
13 general practitioners are often confused about the evidence base of extensive guidelines relevant to their  
14  
15 practice and they experience more practical constraints on guideline implementation [32]. Therefore, while it is  
16  
17 crucial to prioritize high-level evidence to improve reliability of these guidelines, equal emphasis should also be  
18  
19 placed on training of primary care practitioners.  
20  
21  
22  
23  
24

## 25 26 **Strengths and limitations**

27  
28  
29 This study has several strengths. Firstly, this questionnaire survey was nationally representative and  
30  
31 provided reliable data on the physicians' familiarity and awareness of both Chinese and international diabetes  
32  
33 guidelines. Our analysis sample included physicians from different medical institutions across 192 cities in 30  
34  
35 provinces of China, which is highly representative. Secondly, we conducted a stratified analysis approach to  
36  
37 obtain more specific and comprehensive results, including the stratification of physicians in different medical  
38  
39 institutions. Thirdly, apart from the self-reported familiarity and reference questionnaire items, we also  
40  
41 designed a wide range of specific questions concerning multiple key recommendations within the current  
42  
43 guidelines, which will allow us to evaluate the physicians' awareness to contents in the guidelines effectively.  
44  
45 Thus, our findings could provide the latest evidence for future studies focusing on diabetes guidelines in China.  
46  
47  
48  
49

50  
51  
52 Our study also has certain limitations. Firstly, although the sample is representative of Chinese medical  
53  
54 physicians and a substantial number of physicians (>1000), the findings cannot be automatically applied to  
55  
56 other countries. Secondly, we have not examined variations regarding awareness of physicians, self-reported  
57  
58 reference status of physicians, and barriers to treatment among different age, gender, education, or number of  
59  
60

1 patients with diabetes received by the physician. Future studies focusing on the influencing factors of  
2  
3 physicians' compliance with diabetes guidelines will be conducted. Lastly, although we have included  
4  
5 multiple-choice questions to investigate more information, the survey questionnaire has not been generalizable  
6  
7  
8 to test all specific aspects related to the physicians' awareness of the diabetes guidelines.  
9

## 10 **5. CONCLUSION**

11  
12  
13 In conclusion, the level of familiarity and awareness of these four evaluated guidelines varies among  
14  
15 physicians in different-level hospitals. Overall, TCPs generally exhibited the highest familiarity and awareness  
16  
17 of diabetes guidelines. In contrast, the familiarity and awareness of all four guidelines among PCPs are  
18  
19 relatively poor, indicating a necessity of improvement. In addition, there is a significant discrepancy between  
20  
21 modern medicine guidelines and TCM guidelines, highlighting the necessity for further studies focusing on  
22  
23 TCM diabetes guidelines. Moreover, it's crucial to provide consistent education and training for physicians, in  
24  
25 particular, PCPs.  
26  
27  
28  
29  
30

31 **Acknowledgement** This work was carried out by the Specialist Committee for Primary Diabetes Care of China  
32  
33 Association of Chinese Medicine, majority of physicians as members of the Specialist Committee for Primary  
34  
35 Diabetes Care have participated in the survey questionnaire. We would like to express our gratitude to all the  
36  
37 participating physicians.  
38  
39  
40

41  
42 **Contributors** Li-yan Jia, Shu-yu Yang designed the research and took full responsibility for the work as a  
43  
44 whole. Li-yan Jia designed the survey questionnaire, Neng-jiang Zhao, Shun-qin Wang, Bing Yan, Jian-ping  
45  
46 Liu were all involved in critically revising the questionnaire and provided valuable advice for designing the  
47  
48 study. Neng-jiang Zhao, Zhi-hai Zhang, Le Li, Na Zhan, Yuan-bing Lin, Miao-na Cai, participated in  
49  
50 questionnaire distribution and collection. Na Zhan, Yuan-bing Lin participated in questionnaire data checking.  
51  
52 Li-yan Jia analyzed and interpreted the data, and wrote the paper. Cao-xin Huang, Bao-yong Lai, Jian-ping Liu,  
53  
54  
55 Shu-yu Yang contributed to critically revising the manuscript.  
56  
57  
58  
59

60 **Funding** This study was supported by the fund from the State Administration of Traditional Chinese Medicine

1 primary care service project in 2021 “Formulating the guideline for diabetes prevention and treatment in  
2 primary care” (No. (2021) 141) and the Fujian Traditional Chinese Medicine Research Project “Investigation  
3 on the Current Situation of the Development of Traditional Chinese Medicine in Xiamen Third level General  
4 Hospital” (No.2021zyg178). Shuyu Yang was partially supported by the National Famous Traditional Chinese  
5 Medicine Expert Inheritance Studio Construction Project (No. (2022) 75).

### 13 **Conflict of interest**

16 All authors declare that they have no conflicts of interest.

18 **Patient and Public Involvement** Patients and/or the public were not involved in the design, or conduct, or  
19 reporting, or dissemination plans of our research.

24 **Ethics approval** This study involves human participants and has obtained ethical approval from the Medical  
25 Ethics Committee of the First Affiliated Hospital of Xiamen University (No. XMY-2021KY027-02).  
26 Participants gave informed consent to participate in the study before taking part.

### 31 **Abbreviations**

34 ADA American Diabetes Association

36 CACM China Association of Chinese Medicine

39 CDS Chinese Diabetes Society

42 CPGs Clinical practice guidelines

44 IDF International Diabetes Federation

47 PCPs Primary care practitioners

49 SCPs Secondary care hospital physicians

52 SMBG Self-monitoring of blood glucose

55 T2DM Type 2 diabetes mellitus

57 TCM Traditional Chinese medicine

60 TCPs Tertiary care hospital physicians

**Data availability statement** Data are available upon reasonable request.

## Reference

- [1] GBD 2016 Disease and Injury Incidence and Prevalence Collaborators. Global, regional, and national incidence, prevalence, and years lived with disability for 328 diseases and injuries for 195 countries, 1990-2016: a systematic analysis for the Global Burden of Disease Study 2016. *Lancet* 2017;390(10100):1211-1259.
- [2] Qian W, Xu Z, Li F, et al. Prevalence, awareness, treatment and control of diabetes mellitus among middle-aged and elderly people in a rural Chinese population: A cross-sectional study. *PLoS One* 2018;13(6):e0198343.
- [3] Sun H, Saeedi PY, Karuranga S, et al. IDF Diabetes Atlas: Global, regional and country-level diabetes prevalence estimates for 2021 and projections for 2045. *Diabetes Res Clin Pract* 2022;183:109119.
- [4] Hao L, Guoying C, Yihong J, et al. System Dynamic Model Simulates the Growth Trend of Diabetes Mellitus in Chinese Population: Implications for Future Urban Public Health Governance. *Int J Public Health* 2022;67:1605064.
- [5] Limin W, Wen P, Zhenping Z, et al. Prevalence and Treatment of Diabetes in China, 2013-2018. *JAMA* 2021;326(24):2498-2506.
- [6] The Specialist Committee for Primary Diabetes Care, China Association of Chinese Medicine. National Chinese medicine guideline for the prevention and treatment of diabetes in primary care (2022). *Chin J Diabetes Mellitus* 2023;15(2):100-117.
- [7] Bashar Q, April G, Amira Q, et al. Barriers to Clinical Practice Guideline Implementation Among Physicians: A Physician Survey. *Int J Gen Med.* 2021;14:7591-7598.
- [8] Lori M, Allison H L, Emelia J B, et al. National study of physician awareness and adherence to cardiovascular disease prevention guidelines. *Circulation* 2005;111(4):499-510.
- [9] Michelle M C, Lara J A, Paivi M S, et al. Use of national asthma guidelines by allergists and



1 pulmonologists: a national survey. *J Allergy Clin Immunol Pract* 2020;8(9):3011-3020.e2.

2  
3 [10] Sperati C J, Soman S, Agrawal V, et al. Primary care physicians' perceptions of barriers and facilitators to  
4 management of chronic kidney disease: A mixed methods study. *PLoS One* 2019;14(8):e0221325.

5  
6  
7 [11] Mia B, Frances R, Gaston A, et al. Clinicians' attitudes and perceived barriers and facilitators to cancer  
8 treatment clinical practice guideline adherence: a systematic review of qualitative and quantitative literature.  
9  
10  
11  
12  
13 *Implement Sci* 2020;15(1):39.

14  
15  
16 [12] Indah S W, Yolanda van der G, Pradana S, et al. Awareness, agreement, adoption and adherence to type 2  
17 diabetes mellitus guidelines: a survey of Indonesian primary care physicians. *BMC Fam Pract* 2014;15:72.

18  
19 [13] Meng X, Liu X, Tan J, et al. From Xiaoke to diabetes mellitus: a review of the research progress in  
20 traditional Chinese medicine for diabetes mellitus treatment. *Chin Med*. 2023;18(1):75.

21  
22  
23 [14] Lian F, Ni Q, Shen Y, et al. International traditional Chinese medicine guideline for diagnostic and  
24 treatment principles of diabetes. *Ann Palliat Med*. 2020;9(4):2237-2250.

25  
26  
27 [15] Tian JX, Jin D, Bao Q, et al. Evidence and potential mechanisms of traditional Chinese medicine for the  
28 treatment of type 2 diabetes: A systematic review and meta-analysis. *Diabetes Obes Metab*. 2019;21(8):  
29 1801-1816.

30  
31  
32 [16] Wen QD, Hu M, Lai MH, et al. Effect of acupuncture and metformin on insulin sensitivity in women with  
33 polycystic ovary syndrome and insulin resistance: a three-armed randomized controlled trial. *Hum Reprod*.  
34 2022;37(3):542-552.

35  
36  
37 [17] Yang HY, Han JH, Yang KQ, et al. Theoretical Exploration of Professor Xinzhi Wang's Use of Minor  
38 Bupleurum Decoction in Treating Bloating Caused by Acarbose. *Chinese Journal of Integrative Medicine on*  
39 *Cardio-Cerebrovascular Disease*. 2019;17(7): 1108-1109.

40  
41  
42  
43 [18] Fu H, Zhu HL, Han QN, et al. Network meta-analysis of the efficacy of Chinese herbal formulas combined  
44 with mecobalamin tablets in the treatment of diabetic peripheral neuropathy. *Hunan Journal of Traditional*  
45 *Chinese Medicine*. 2023;39(9):139-146.

46  
47  
48  
49 [19] Chinese Diabetes Society. Guideline for the prevention and treatment of type 2 diabetes mellitus in China  
50



(2020 edition). *Chin J Diabetes Mellitus* 2021;13(04): 315-409.

[20] Chinese Diabetes Society, National Office for Primary Diabetes Care. National guidelines for the prevention and control of diabetes in primary care (2022). *Chin J Intern Med* 2022; 61(03):249-262.

[21] American Diabetes Association. Standards of Medical Care in Diabetes-2022. *Diabetes Care* 2022;45(Suppl 1):1-270.

[22] Xiaolin T, Ximing L, Junping W, et al. Guidelines for prevention and treatment of diabetes in Chinese Medicine. *Chinese Medicine Modern Distance Education of China* 2011;9(04):148-151.

[23] Huang Q, Xu X, Shou J, et al. Study on related factors of low control rate of general practitioner in type 2 diabetes mellitus. *Journal of Nantong University (Medical Sciences)* 2017;37(6):514-516.

[24] Carlsen B, Bringedal B. Attitudes to clinical guidelines--do GPs differ from other medical doctors?[J]. *BMJ Qual Saf.* 2011;20(2):158-62.

[25] Spiegel B M R , Farid M, van Oijen M G H, et al. Adherence to best practice guidelines in dyspepsia: a survey comparing dyspepsia experts, community gastroenterologists and primary-care providers[J]. *Aliment Pharmacol Ther.* 2009;29(8):871-81.

[26] Batais MA, Almigbal TH, Bin Abdulhak AA, et al. Assessment of physicians' awareness and knowledge of familial hypercholesterolemia in Saudi Arabia: Is there a gap? *PLoS One* 2017;12(8):e0183494.

[27] Ji L, Newman J, Lu J, et al. Understanding the standard of care in the treatment of type 2 diabetes in China: results from a national survey. *Chin Med J (Engl)* 2014;127(20):3524-3529.

[28] Jiao Y, Liu J, Jiang L, et al. Guidelines on common cold for traditional Chinese medicine based on pattern differentiation. *J Tradit Chin Med* 2013;33(4):417-422.

[29] Dou Z, Xia Y, Zhang J, et al. Syndrome Differentiation and Treatment Regularity in Traditional Chinese Medicine for Type 2 Diabetes: A Text Mining Analysis. *Front Endocrinol (Lausanne)* 2021;12:728032.

[30] Fürthauer J, Flamm M, Sönnichsen A. Patient and physician related factors of adherence to evidence based guidelines in diabetes mellitus type 2, cardiovascular disease and prevention: a cross sectional study. *BMC Fam*

1 *Pract* 2013;14:47.

2  
3 [31] Baha A, Kokturk N. Physician's attitude against COPD guidelines and the choice of first-line treatment for  
4  
5 COPD[J]. *Respir Med*. 2021;176:106273.

6  
7  
8 [32] Jamé S, Wittenberg E, Potter MB, et al. The new lipid guidelines: what do primary care clinicians  
9  
10 think?[J]. *Am J Med*. 2015;128(8):914.e5-914.e10.

11  
12  
13 [33] Lang JK, Paykel MS, Haines KJ, et al. Clinical practice guidelines for early mobilization in the ICU: a  
14  
15 systematic review. *Crit Care Med* 2020;48(11):e1121-e1128.

### 16 17 18 **Figure legends**

19  
20  
21 Figure 1. Familiarity of physicians from different levels of hospitals with four diabetes guidelines (TCPs,  
22  
23 tertiary care hospital physicians; SCPs, secondary care hospital physicians; PCPs, primary care practitioners).

24  
25  
26 Figure 2. Physicians' instruction on self-monitoring of blood glucose and the availability of health management  
27  
28 team (TCPs, tertiary care hospital physicians; SCPs, secondary care hospital physicians; PCPs, primary care  
29  
30 practitioners)

### 31 32 33 **Supporting information**

34  
35  
36 Appendix1. Physicians demographic and profession characteristics

37  
38  
39 Appendix2. Recommendations excerpted from the diabetes guidelines

40  
41  
42 Appendix3. Facilitating factors and barriers to diabetes guideline implementation

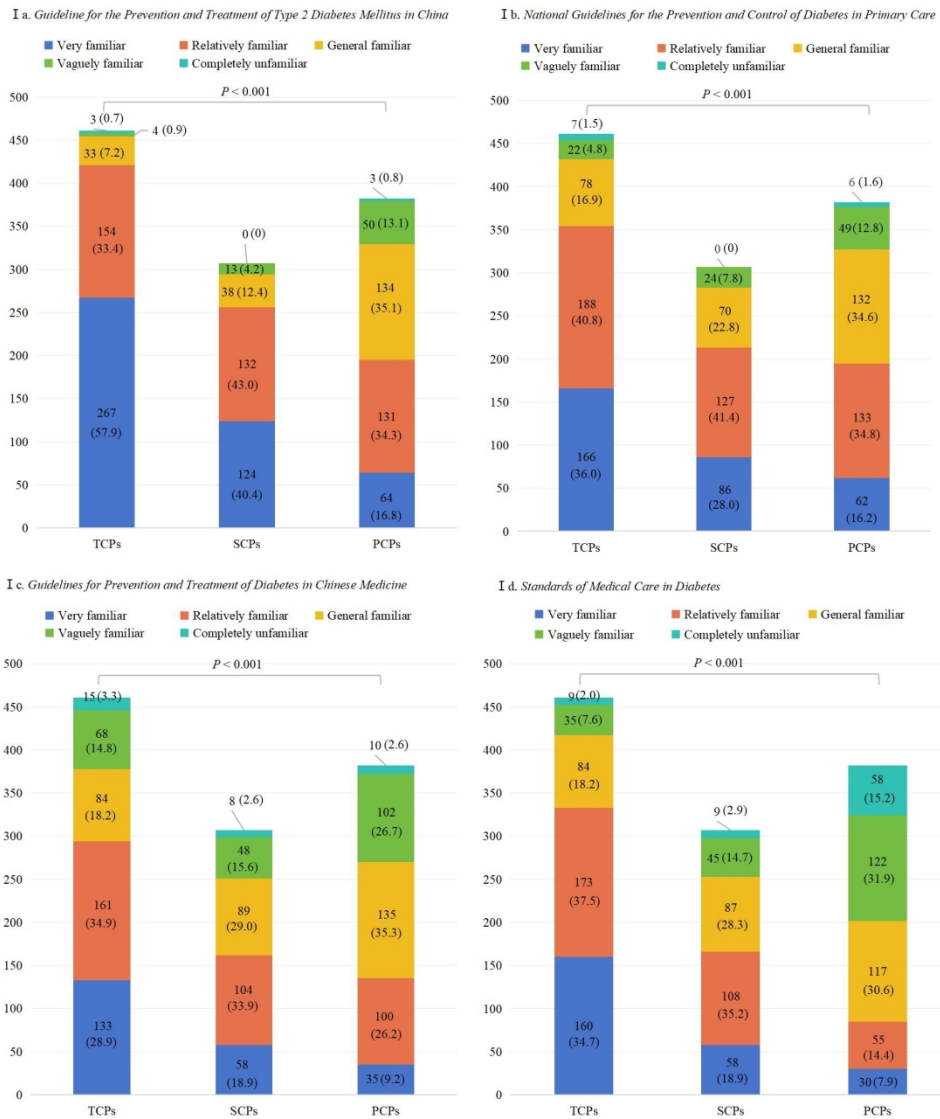

Figure 1. Familiarity of physicians from different levels of hospitals with four diabetes guidelines (TCPs, tertiary care hospital physicians; SCPs, secondary care hospital physicians; PCPs, primary care practitioners)

399x456mm (120 x 120 DPI)

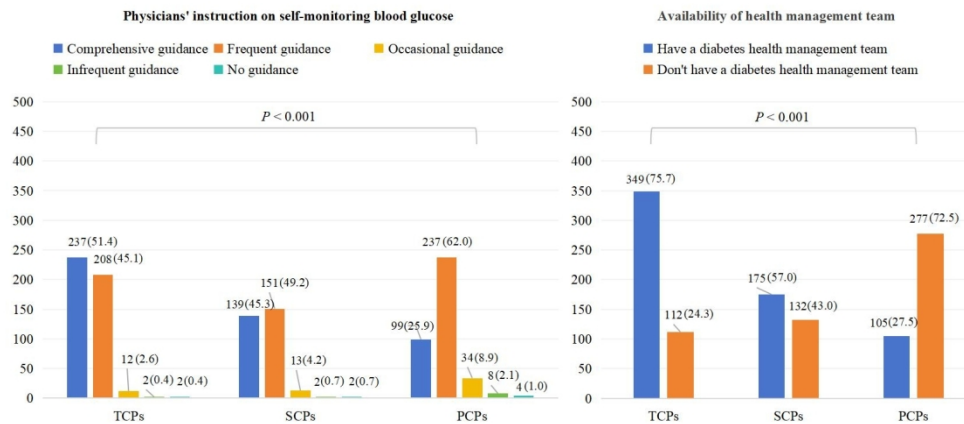

Figure 2. Physicians' instruction on self-monitoring of blood glucose and the availability of health management team (TCPs, tertiary care hospital physicians; SCPs, secondary care hospital physicians; PCPs, primary care practitioners)

365x160mm (120 x 120 DPI)

Appendix 1. Physicians demographic and profession characteristics [n(%)]

| Variable                                                     | Physicians in different level hospitals     |                                              |                                      | <i>P</i> -value |
|--------------------------------------------------------------|---------------------------------------------|----------------------------------------------|--------------------------------------|-----------------|
|                                                              | Tertiary care hospital physicians (n = 461) | Secondary care hospital physicians (n = 307) | Primary care practitioners (n = 382) |                 |
| Age (mean years $\pm$ s.d.)                                  | 40.82 $\pm$ 9.21                            | 40.42 $\pm$ 8.78                             | 41.27 $\pm$ 8.13                     | 0.215           |
| Male gender                                                  | 189 (41.00)                                 | 158 (51.47)                                  | 209 (54.71)                          | < 0.001         |
| Education level                                              |                                             |                                              |                                      | < 0.001         |
| Technical secondary and below                                | 0 (0)                                       | 1 (0.33)                                     | 35 (9.16)                            |                 |
| College degree                                               | 7 (1.52)                                    | 17 (5.54)                                    | 107 (28.01)                          |                 |
| Bachelor degree                                              | 169 (36.66)                                 | 231 (75.24)                                  | 213 (55.76)                          |                 |
| Master degree                                                | 222 (48.16)                                 | 58 (18.89)                                   | 26 (6.81)                            |                 |
| Doctoral degree                                              | 63 (13.67)                                  | 0 (0)                                        | 1 (0.26)                             |                 |
| Professional category                                        |                                             |                                              |                                      | < 0.001         |
| TCM                                                          | 135 (29.28)                                 | 76 (24.76)                                   | 88 (23.04)                           |                 |
| Integrated traditional Chinese medicine and western medicine | 137 (29.72)                                 | 89 (28.99)                                   | 81 (21.20)                           |                 |
| Modern clinical medicine                                     | 188 (40.78)                                 | 140 (45.60)                                  | 200 (52.36)                          |                 |
| Other categories                                             | 1 (0.22)                                    | 2 (0.65)                                     | 13 (3.40)                            |                 |
| Years in practice (mean years $\pm$ s.d.)                    | 15.50 $\pm$ 9.82                            | 15.12 $\pm$ 9.00                             | 17.30 $\pm$ 9.05                     | 0.001           |
| Technical title                                              |                                             |                                              |                                      | < 0.001         |
| Junior (Resident physicians)                                 | 71 (15.40)                                  | 53 (17.26)                                   | 170 (44.50)                          |                 |
| Intermediate (Attending physicians)                          | 131 (28.42)                                 | 121 (39.41)                                  | 137 (35.86)                          |                 |
| Sub-senior (Associate chief physicians)                      | 138 (29.93)                                 | 92 (29.97)                                   | 67 (17.54)                           |                 |
| Senior (Chief physicians)                                    | 121 (26.25)                                 | 41 (13.36)                                   | 8 (2.09)                             |                 |
| Diabetes practice setting                                    |                                             |                                              |                                      | < 0.001         |
| Department of endocrinology and diabetes                     | 327 (70.93)                                 | 171 (55.70)                                  | 11 (2.88)                            |                 |
| Department of general practice                               | 14 (3.04)                                   | 13 (4.23)                                    | 212 (55.50)                          |                 |
| Other departments                                            | 120 (26.03)                                 | 123 (40.07)                                  | 159 (41.63)                          |                 |
| Number of patients with diabetes (per week)                  |                                             |                                              |                                      | < 0.001         |
| None                                                         | 4 (0.87)                                    | 2 (0.65)                                     | 9 (2.36)                             |                 |
| 1 ~ 10                                                       | 99 (21.48)                                  | 75 (24.43)                                   | 163 (42.67)                          |                 |
| 11 ~ 50                                                      | 133 (28.85)                                 | 120 (39.09)                                  | 150 (39.27)                          |                 |
| 51 ~ 100                                                     | 115 (24.95)                                 | 60 (19.54)                                   | 44 (11.52)                           |                 |
| 101 ~ 300                                                    | 98 (21.26)                                  | 36 (11.73)                                   | 15 (3.93)                            |                 |
| $\geq$ 301                                                   | 12 (2.6)                                    | 14 (4.56)                                    | 1 (0.26)                             |                 |



- 1  
2  
3  
4 need to be regularly monitored.  
5  
6 ①Physical exercise therapy should be conducted  
7 Recommendation  
8 under the guidance of relevant professionals.  
9  
10 ②Prior to exercise, necessary health and  
11  
12 physical ability assessments should be conducted  
13 Recommendation  
14 3. Physical exercise to ensure the safety and effectiveness of the  
15 management exercise therapy.  
16  
17 ③Physical exercise should be avoided in cases  
18  
19 of severe hypoglycemia, and can be gradually  
20 Recommendation  
21 resumed once the condition is under control and  
22  
23 stabilized.  
24  
25 ①Classification of hypoglycemia:  
26  
27 Grade 1 hypoglycemia: Blood glucose levels are  
28  
29 between 3.0 mmol/l and 3.9 mmol/l; Grade 2  
30  
31 hypoglycemia: Blood glucose levels are less than  
32  
33 3.0 mmol/l; Grade 3 hypoglycemia: Recommendation  
34  
35 Hypoglycemia without a specific blood glucose  
36  
37 limit, accompanied by severe alterations in  
38  
39 consciousness and / or physical changes,  
40  
41 4. Hypoglycemia requiring assistance from others.  
42  
43 ②The clinical symptoms of hypoglycemia are  
44  
45 related to the level and rate of decline of blood  
46  
47 glucose. They can manifest as symptoms of  
48  
49 sympathetic activation (such as palpitations,  
50 Recommendation  
51 anxiety, sweating, dizziness, trembling hands,  
52  
53 and feelings of hunger) and central nervous  
54  
55 symptoms (such as changes in mental status,  
56  
57 cognitive impairment, convulsions, and coma).  
58  
59 5. Diabetes with Qi-Yin ①For the treatment of Qi-Yin deficiency Recommendation  
60

|    |                        |                                                   |                |
|----|------------------------|---------------------------------------------------|----------------|
| 1  |                        |                                                   |                |
| 2  |                        |                                                   |                |
| 3  |                        |                                                   |                |
| 4  | deficiency syndrome    | syndrome in type 2 diabetes, Jinlida granules and |                |
| 5  |                        | Shenqi Jiangtang granules can be used in          |                |
| 6  |                        | combination with routine treatment.               |                |
| 7  |                        |                                                   |                |
| 8  |                        |                                                   |                |
| 9  |                        | ②Shengmai Powder, with appropriate                |                |
| 10 |                        | adjustments to dosage, can be used to alleviate   |                |
| 11 |                        | the symptoms of fatigue and Qi-Yin deficiency     | Recommendation |
| 12 |                        | syndrome in patients with diabetes.               |                |
| 13 |                        |                                                   |                |
| 14 |                        | ③For the early and middle stages of type 2        |                |
| 15 |                        | diabetes, Gegen Qinlian decoction can be          |                |
| 16 |                        | administered orally for intestinal-damp-heat      |                |
| 17 |                        | syndrome, and Dachaihu Decoction can be           | Recommendation |
| 18 |                        | administered orally for stagnated-heat in liver   |                |
| 19 |                        | and stomach syndrome.                             |                |
| 20 |                        |                                                   |                |
| 21 |                        | ①For diabetic neuropathy patients with            |                |
| 22 |                        | Qi-deficiency and collateral-obstruction          |                |
| 23 | 6. Diabetic neuropathy | syndrome, Mudan granule can be administered       | Recommendation |
| 24 | with Qi-deficiency and | orally, and can be combined with acupuncture      |                |
| 25 | collateral-obstruction | and fumigation treatment to improve symptoms.     |                |
| 26 | syndrome               |                                                   |                |
| 27 |                        |                                                   |                |
| 28 |                        |                                                   |                |
| 29 |                        |                                                   |                |
| 30 |                        |                                                   |                |
| 31 |                        |                                                   |                |
| 32 |                        |                                                   |                |
| 33 |                        |                                                   |                |
| 34 |                        |                                                   |                |
| 35 |                        |                                                   |                |
| 36 |                        |                                                   |                |
| 37 |                        |                                                   |                |
| 38 |                        |                                                   |                |
| 39 |                        |                                                   |                |
| 40 |                        |                                                   |                |
| 41 |                        |                                                   |                |
| 42 |                        |                                                   |                |
| 43 |                        |                                                   |                |
| 44 |                        |                                                   |                |
| 45 |                        |                                                   |                |
| 46 |                        |                                                   |                |
| 47 |                        |                                                   |                |
| 48 |                        |                                                   |                |
| 49 |                        |                                                   |                |
| 50 |                        |                                                   |                |
| 51 |                        |                                                   |                |
| 52 |                        |                                                   |                |
| 53 |                        |                                                   |                |
| 54 |                        |                                                   |                |
| 55 |                        |                                                   |                |
| 56 |                        |                                                   |                |
| 57 |                        |                                                   |                |
| 58 |                        |                                                   |                |
| 59 |                        |                                                   |                |
| 60 |                        |                                                   |                |



Appendix3. Facilitating factors and barriers to diabetes guideline implementation [n(%)]

| Categories                                                                               | Overall<br>(n = 1150) | Physicians in different level hospitals              |                                                       |                                            | <i>P</i> -value |
|------------------------------------------------------------------------------------------|-----------------------|------------------------------------------------------|-------------------------------------------------------|--------------------------------------------|-----------------|
|                                                                                          |                       | Tertiary care<br>hospital<br>physicians<br>(n = 461) | Secondary care<br>hospital<br>physicians<br>(n = 307) | Primary care<br>practitioners<br>(n = 382) |                 |
| Facilitating factors                                                                     |                       |                                                      |                                                       |                                            |                 |
| The guideline can standardize clinical practices and improve the quality of medical care | 1100 (95.65)          | 443 (96.10)                                          | 298 (97.07)                                           | 359 (93.98)                                | 0.118           |
| Guide patients in self-care and nursing                                                  | 907 (78.87)           | 359 (77.87)                                          | 247 (80.46)                                           | 301 (78.80)                                | 0.691           |
| Guidelines with a high level of evidence can be highly convincing                        | 714 (62.09)           | 331 (71.80)*                                         | 207 (67.43)*                                          | 176 (46.07)*                               | < 0.001         |
| The format of the guidelines is standardized and easy to navigate                        | 657 (57.13)           | 273 (59.22)*                                         | 190 (61.89)*                                          | 194 (50.79)*                               | 0.007           |
| The guideline can facilitate communication with patients                                 | 686 (59.65)           | 260 (56.40)*                                         | 201 (65.47)*                                          | 225 (58.90)*                               | 0.040           |
| Reduce medical costs                                                                     | 627 (54.52)           | 266 (57.70)                                          | 169 (55.05)                                           | 192 (50.26)                                | 0.095           |
| Barriers                                                                                 |                       |                                                      |                                                       |                                            |                 |
| Restricted the autonomy of doctors                                                       | 376 (32.70)           | 155 (33.62)                                          | 96 (31.27)                                            | 125 (32.72)                                | 0.793           |
| Requires time-consuming communication with patients                                      | 676 (58.78)           | 242 (52.49)*                                         | 184 (59.93)*                                          | 250 (65.45)*                               | 0.001           |
| Increases the risk of physicians taking more responsibility for medical malpractice      | 239 (20.78)           | 81 (17.57)                                           | 69 (22.48)                                            | 89 (23.30)                                 | 0.087           |
| Limited availability and accessibility of TCM diabetes guidelines                        | 763 (66.35)           | 317 (68.76)                                          | 211 (68.73)                                           | 235 (61.52)                                | 0.050           |
| The guideline cannot be downloaded for reading                                           | 353 (30.70)           | 153 (33.19)                                          | 99 (32.25)                                            | 101 (26.44)                                | 0.084           |
| The guideline recommendation lacks a convincing basis                                    | 276 (24.00)           | 135 (29.28)*                                         | 70 (22.80)*                                           | 71 (18.59)*                                | 0.001           |

1  
2  
3  
4  
5  
6  
7  
8  
9  
10  
11  
12  
13  
14  
15  
16  
17  
18  
19  
20  
21  
22  
23  
24  
25  
26  
27  
28  
29  
30  
31  
32  
33  
34  
35  
36  
37  
38  
39  
40  
41  
42  
43  
44  
45  
46  
47  
48  
49  
50  
51  
52  
53  
54  
55  
56  
57  
58  
59  
60STROBE Statement—Checklist of items that should be included in reports of *cross-sectional studies*

|                              | <b>Item No</b> | <b>Recommendation</b>                                                                                                                                                                             | <b>Page/line numbers</b> |
|------------------------------|----------------|---------------------------------------------------------------------------------------------------------------------------------------------------------------------------------------------------|--------------------------|
| <b>Title and abstract</b>    | 1              | (a) Indicate the study's design with a commonly used term in the title or the abstract                                                                                                            | Page 1, 2                |
|                              |                | (b) Provide in the abstract an informative and balanced summary of what was done and what was found                                                                                               | Page 2                   |
| <b>Introduction</b>          |                |                                                                                                                                                                                                   |                          |
| Background/rationale         | 2              | Explain the scientific background and rationale for the investigation being reported                                                                                                              | Page 3, 4                |
| Objectives                   | 3              | State specific objectives, including any prespecified hypotheses                                                                                                                                  | Page 4                   |
| <b>Methods</b>               |                |                                                                                                                                                                                                   |                          |
| Study design                 | 4              | Present key elements of study design early in the paper                                                                                                                                           | Page 5                   |
| Setting                      | 5              | Describe the setting, locations, and relevant dates, including periods of recruitment, exposure, follow-up, and data collection                                                                   | Page 5, 6                |
| Participants                 | 6              | (a) Give the eligibility criteria, and the sources and methods of selection of participants                                                                                                       | Page 5                   |
| Variables                    | 7              | Clearly define all outcomes, exposures, predictors, potential confounders, and effect modifiers. Give diagnostic criteria, if applicable                                                          | Page 5                   |
| Data sources/<br>measurement | 8*             | For each variable of interest, give sources of data and details of methods of assessment (measurement). Describe comparability of assessment methods if there is more than one group              | Page 5, 6                |
| Bias                         | 9              | Describe any efforts to address potential sources of bias                                                                                                                                         | Page 5                   |
| Study size                   | 10             | Explain how the study size was arrived at                                                                                                                                                         | Page 6                   |
| Quantitative<br>variables    | 11             | Explain how quantitative variables were handled in the analyses. If applicable, describe which groupings were chosen and why                                                                      | Page 6                   |
| Statistical methods          | 12             | (a) Describe all statistical methods, including those used to control for confounding                                                                                                             | Page 6                   |
|                              |                | (b) Describe any methods used to examine subgroups and interactions                                                                                                                               | Page 6                   |
|                              |                | (c) Explain how missing data were addressed                                                                                                                                                       | NA                       |
|                              |                | (d) If applicable, describe analytical methods taking account of sampling strategy                                                                                                                | NA                       |
|                              |                | (e) Describe any sensitivity analyses                                                                                                                                                             | NA                       |
| <b>Results</b>               |                |                                                                                                                                                                                                   |                          |
| Participants                 | 13*            | (a) Report numbers of individuals at each stage of study—eg numbers potentially eligible, examined for eligibility, confirmed eligible, included in the study, completing follow-up, and analysed | Page 6                   |
|                              |                | (b) Give reasons for non-participation at each stage                                                                                                                                              | NA                       |
|                              |                | (c) Consider use of a flow diagram                                                                                                                                                                | NA                       |
| Descriptive data             | 14*            | (a) Give characteristics of study participants (eg demographic, clinical, social) and information on exposures and potential confounders                                                          | Page 6                   |
|                              |                | (b) Indicate number of participants with missing data for each variable of interest                                                                                                               | Page 6                   |
| Outcome data                 | 15*            | Report numbers of outcome events or summary measures                                                                                                                                              | NA                       |
| Main results                 | 16             | (a) Give unadjusted estimates and, if applicable, confounder-adjusted estimates and their precision (eg, 95% confidence interval). Make clear                                                     | NA                       |

|                          |    |                                                                                                                                                                            |                    |
|--------------------------|----|----------------------------------------------------------------------------------------------------------------------------------------------------------------------------|--------------------|
|                          |    | which confounders were adjusted for and why they were included                                                                                                             |                    |
|                          |    | (b) Report category boundaries when continuous variables were categorized                                                                                                  | NA                 |
|                          |    | (c) If relevant, consider translating estimates of relative risk into absolute risk for a meaningful time period                                                           | NA                 |
| Other analyses           | 17 | Report other analyses done—eg analyses of subgroups and interactions, and sensitivity analyses                                                                             | Page 8 to page 12  |
| <b>Discussion</b>        |    |                                                                                                                                                                            |                    |
| Key results              | 18 | Summarise key results with reference to study objectives                                                                                                                   | Page 13            |
| Limitations              | 19 | Discuss limitations of the study, taking into account sources of potential bias or imprecision. Discuss both direction and magnitude of any potential bias                 | Page 15            |
| Interpretation           | 20 | Give a cautious overall interpretation of results considering objectives, limitations, multiplicity of analyses, results from similar studies, and other relevant evidence | Page 13 to page 15 |
| Generalisability         | 21 | Discuss the generalisability (external validity) of the study results                                                                                                      | Page 15            |
| <b>Other information</b> |    |                                                                                                                                                                            |                    |
| Funding                  | 22 | Give the source of funding and the role of the funders for the present study and, if applicable, for the original study on which the present article is based              | Page 16            |

\*Give information separately for exposed and unexposed groups.

NA: Not applicable.

**Note:** An Explanation and Elaboration article discusses each checklist item and gives methodological background and published examples of transparent reporting. The STROBE checklist is best used in conjunction with this article (freely available on the Web sites of PLoS Medicine at <http://www.plosmedicine.org/>, Annals of Internal Medicine at <http://www.annals.org/>, and Epidemiology at <http://www.epidem.com/>). Information on the STROBE Initiative is available at [www.strobe-statement.org](http://www.strobe-statement.org).
