# Supplementary material for: Nationwide survey of physicians’ familiarity and awareness of diabetes guidelines in China: a cross-sectional study
Source: PubMed Central journal article supplement — BMJ Open. 2023 Dec 21;13(12):e074301. doi: 10.1136/bmjopen-2023-074301 (PMC10749004; doi:10.1136/bmjopen-2023-074301), 2023-12-21
Supplement: bmjopen-2023-074301supp001.pdf [file bmjopen-2023-074301supp001.pdf]

Appendix 1. Physicians demographic and profession characteristics [n(%)]

| Variable                                                     | Physicians in different level hospitals     |                                              |                                      | P-value |
|--------------------------------------------------------------|---------------------------------------------|----------------------------------------------|--------------------------------------|---------|
|                                                              | Tertiary care hospital physicians (n = 461) | Secondary care hospital physicians (n = 307) | Primary care practitioners (n = 382) |         |
| Age (mean years $\pm$ s.d.)                                  | 40.82 $\pm$ 9.21                            | 40.42 $\pm$ 8.78                             | 41.27 $\pm$ 8.13                     | 0.215   |
| Male gender                                                  | 189 (41.00)                                 | 158 (51.47)                                  | 209 (54.71)                          | < 0.001 |
| Education level                                              |                                             |                                              |                                      | < 0.001 |
| Technical secondary and below                                | 0 (0)                                       | 1 (0.33)                                     | 35 (9.16)                            |         |
| College degree                                               | 7 (1.52)                                    | 17 (5.54)                                    | 107 (28.01)                          |         |
| Bachelor degree                                              | 169 (36.66)                                 | 231 (75.24)                                  | 213 (55.76)                          |         |
| Master degree                                                | 222 (48.16)                                 | 58 (18.89)                                   | 26 (6.81)                            |         |
| Doctoral degree                                              | 63 (13.67)                                  | 0 (0)                                        | 1 (0.26)                             |         |
| Professional category                                        |                                             |                                              |                                      | < 0.001 |
| TCM                                                          | 135 (29.28)                                 | 76 (24.76)                                   | 88 (23.04)                           |         |
| Integrated traditional Chinese medicine and western medicine | 137 (29.72)                                 | 89 (28.99)                                   | 81 (21.20)                           |         |
| Modern clinical medicine                                     | 188 (40.78)                                 | 140 (45.60)                                  | 200 (52.36)                          |         |
| Other categories                                             | 1 (0.22)                                    | 2 (0.65)                                     | 13 (3.40)                            |         |
| Years in practice (mean years $\pm$ s.d.)                    | 15.50 $\pm$ 9.82                            | 15.12 $\pm$ 9.00                             | 17.30 $\pm$ 9.05                     | 0.001   |
| Technical title                                              |                                             |                                              |                                      | < 0.001 |
| Junior (Resident physicians)                                 | 71 (15.40)                                  | 53 (17.26)                                   | 170 (44.50)                          |         |
| Intermediate (Attending physicians)                          | 131 (28.42)                                 | 121 (39.41)                                  | 137 (35.86)                          |         |
| Sub-senior (Associate chief physicians)                      | 138 (29.93)                                 | 92 (29.97)                                   | 67 (17.54)                           |         |
| Senior (Chief physicians)                                    | 121 (26.25)                                 | 41 (13.36)                                   | 8 (2.09)                             |         |
| Diabetes practice setting                                    |                                             |                                              |                                      | < 0.001 |
| Department of endocrinology and diabetes                     | 327 (70.93)                                 | 171 (55.70)                                  | 11 (2.88)                            |         |
| Department of general practice                               | 14 (3.04)                                   | 13 (4.23)                                    | 212 (55.50)                          |         |
| Other departments                                            | 120 (26.03)                                 | 123 (40.07)                                  | 159 (41.63)                          |         |
| Number of patients with diabetes (per week)                  |                                             |                                              |                                      | < 0.001 |
| None                                                         | 4 (0.87)                                    | 2 (0.65)                                     | 9 (2.36)                             |         |
| 1 ~ 10                                                       | 99 (21.48)                                  | 75 (24.43)                                   | 163 (42.67)                          |         |
| 11 ~ 50                                                      | 133 (28.85)                                 | 120 (39.09)                                  | 150 (39.27)                          |         |
| 51 ~ 100                                                     | 115 (24.95)                                 | 60 (19.54)                                   | 44 (11.52)                           |         |
| 101 ~ 300                                                    | 98 (21.26)                                  | 36 (11.73)                                   | 15 (3.93)                            |         |
| $\geq$ 301                                                   | 12 (2.6)                                    | 14 (4.56)                                    | 1 (0.26)                             |         |
