# Supplementary material for: Nationwide survey of physicians’ familiarity and awareness of diabetes guidelines in China: a cross-sectional study
Source: PubMed Central journal article supplement — BMJ Open. 2023 Dec 21;13(12):e074301. doi: 10.1136/bmjopen-2023-074301 (PMC10749004; doi:10.1136/bmjopen-2023-074301), 2023-12-21
Supplement: bmjopen-2023-074301supp003.pdf [file bmjopen-2023-074301supp003.pdf]

Appendix 3. Facilitating factors and barriers to diabetes guideline implementation [n(%)]

| Categories                                                                               | Overall<br>(n = 1150) | Physicians in different level hospitals              |                                                       |                                            | P-value |
|------------------------------------------------------------------------------------------|-----------------------|------------------------------------------------------|-------------------------------------------------------|--------------------------------------------|---------|
|                                                                                          |                       | Tertiary care<br>hospital<br>physicians<br>(n = 461) | Secondary care<br>hospital<br>physicians<br>(n = 307) | Primary care<br>practitioners<br>(n = 382) |         |
| <b>Facilitating factors</b>                                                              |                       |                                                      |                                                       |                                            |         |
| The guideline can standardize clinical practices and improve the quality of medical care | 1100 (95.65)          | 443 (96.10)                                          | 298 (97.07)                                           | 359 (93.98)                                | 0.118   |
| Guide patients in self-care and nursing                                                  | 907 (78.87)           | 359 (77.87)                                          | 247 (80.46)                                           | 301 (78.80)                                | 0.691   |
| Guidelines with a high level of evidence can be highly convincing                        | 714 (62.09)           | 331 (71.80)*                                         | 207 (67.43)*                                          | 176 (46.07)*                               | < 0.001 |
| The format of the guidelines is standardized and easy to navigate                        | 657 (57.13)           | 273 (59.22)*                                         | 190 (61.89)*                                          | 194 (50.79)*                               | 0.007   |
| The guideline can facilitate communication with patients                                 | 686 (59.65)           | 260 (56.40)*                                         | 201 (65.47)*                                          | 225 (58.90)*                               | 0.040   |
| Reduce medical costs                                                                     | 627 (54.52)           | 266 (57.70)                                          | 169 (55.05)                                           | 192 (50.26)                                | 0.095   |
| <b>Barriers</b>                                                                          |                       |                                                      |                                                       |                                            |         |
| Restricted the autonomy of doctors                                                       | 376 (32.70)           | 155 (33.62)                                          | 96 (31.27)                                            | 125 (32.72)                                | 0.793   |
| Requires time-consuming communication with patients                                      | 676 (58.78)           | 242 (52.49)*                                         | 184 (59.93)*                                          | 250 (65.45)*                               | 0.001   |
| Increases the risk of physicians taking more responsibility for medical malpractice      | 239 (20.78)           | 81 (17.57)                                           | 69 (22.48)                                            | 89 (23.30)                                 | 0.087   |
| Limited availability and accessibility of TCM diabetes guidelines                        | 763 (66.35)           | 317 (68.76)                                          | 211 (68.73)                                           | 235 (61.52)                                | 0.050   |
| The guideline cannot be downloaded for reading                                           | 353 (30.70)           | 153 (33.19)                                          | 99 (32.25)                                            | 101 (26.44)                                | 0.084   |
| The guideline recommendation lacks a convincing basis                                    | 276 (24.00)           | 135 (29.28)*                                         | 70 (22.80)*                                           | 71 (18.59)*                                | 0.001   |
